# Supplementary material
Source: PubMed Central journal article supplement (PMC2886519)
Supplement: NIHMS204940-supplement-1_si_001.pdf [file NIHMS204940-supplement-1_si_001.pdf]

## SUPPORTING INFORMATION

### Borostannylation of Alkynes and Enynes. Scope and Limitations of the Reaction and Utility of the Adducts

Ramakrishna Reddy Singidi and T. V. RajanBabu \*  
Department of Chemistry, The Ohio State University, Columbus, OH 43210 USA

#### Table of Contents

|                                                                                                                                                                                                     |    |
|-----------------------------------------------------------------------------------------------------------------------------------------------------------------------------------------------------|----|
| General procedure for the Pd-catalyzed, borostannylation of alkynes and enynes with [B-Sn]-reagent, followed by pinacolate formation                                                                | S2 |
| Borostannylation of propargyl alcohol benzyl ether <b>2a</b> : synthesis of <b>4a</b>                                                                                                               | S2 |
| Borostannylation of phenylacetylene <b>2b</b> : synthesis of the compound <b>4b</b>                                                                                                                 | S2 |
| Borostannylation of 4-phenyl-1-butyne <b>2c</b> : synthesis of the compound <b>4c</b>                                                                                                               | S2 |
| Borostannylation of Trimethyl(propargyl)silane <b>2d</b> : synthesis of the compound <b>4d</b>                                                                                                      | S3 |
| Borostannylation of triphenyl(2-propynyl)stannane <b>2e</b> : synthesis of the compound <b>4e</b>                                                                                                   | S3 |
| Borostannylation of Diphenylacetylene <b>2f</b> : synthesis of the compound <b>4f</b>                                                                                                               | S3 |
| Borostannylation of 1-Phenyl-1-propyne <b>2g</b> : synthesis of the compounds <b>4g1</b> and <b>4g2</b>                                                                                             | S3 |
| Borostannylation of 1-Phenyl-1-butyne <b>2h</b> : synthesis of the compounds <b>4h1</b> and <b>4h2</b>                                                                                              | S4 |
| Improved Regioselectivity (94 : 6) for the borostannylation of 1-Phenyl-1-butyne <b>2h</b> in the presence of PdCl <sub>2</sub> (CH <sub>3</sub> CN) <sub>2</sub> , P( <i>t</i> -Bu) <sub>3</sub> . | S4 |
| Borostannylation of acetylene: synthesis of the compound <b>5</b>                                                                                                                                   | S5 |
| Borostannylation of 2-Methyl-1-buten-3-yne <b>6a</b> : synthesis of the compound <b>7a</b>                                                                                                          | S5 |
| Borostannylation of Enyne <b>6b</b> : synthesis of the compound <b>7b</b>                                                                                                                           | S5 |
| Borostannylation of 1-Ethynylcyclohexene <b>6c</b> : synthesis of the compound <b>7c</b>                                                                                                            | S5 |
| Borostannylation of Enyne <b>6d</b> : synthesis of the compound <b>7d</b>                                                                                                                           | S6 |
| Borostannylation of Enyne <b>6e</b> : synthesis of the compound <b>7e</b>                                                                                                                           | S6 |
| Selective Stille Coupling followed by Suzuki Coupling: synthesis of the compounds <b>8</b> and <b>9</b>                                                                                             | S6 |
| Diels-Alder reaction of <b>7a</b> : synthesis of the compound <b>10</b>                                                                                                                             | S7 |
| Synthesis of enyne <b>6b</b>                                                                                                                                                                        | S7 |
| Synthesis of enyne <b>6e</b>                                                                                                                                                                        | S7 |
| <sup>1</sup> H and <sup>13</sup> C NMR Spectra of key compounds                                                                                                                                     | S9 |

**General procedure for the Pd-catalyzed, borostannylation of alkynes and enynes with [B-Sn]-reagent 1, followed by pinacolate formation:**

To a solution of 1,3-dimethyl-2-(trimethylstannyl)-2-bora-1,3-diazocyclopentane (156 mg, 0.6 mmol) in benzene (4 mL) was added PdCl<sub>2</sub>(PPh<sub>3</sub>)<sub>2</sub> (3.5 mg, 0.005 mmol) and the mixture was stirred at room temperature for 15 min followed by addition of a solution of alkyne or enyne (0.5 mmol) in benzene (1 mL). After stirring the reaction mixture at room temperature for 6 h, a solution of pinacol (84 mg, 0.72 mmol) in benzene (0.5 mL) followed by *p*-toluenesulfonic acid (*p*-TSA, 136 mg, 0.72 mmol) were added. After 2 h, the reaction was quenched by the addition of Et<sub>3</sub>N (0.12 mL, 0.86 mmol) and the solvent was evaporated under reduced pressure to afford the crude product, which was purified by silica gel chromatography using 2-5% EtOAc/hexane as the mobile phase to yield the desired product.

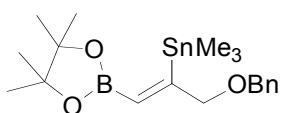

**4a**

**Borostannylation of propargyl alcohol benzyl ether: synthesis of 4a:** Compound **4a** was synthesized from propargyl alcohol benzyl ether **2a** in 83 % isolated yield using the general procedure described above. <sup>1</sup>H NMR (400 MHz, CDCl<sub>3</sub>) δ 7.35-7.25 (m, 5

H), 6.42 (d, *J* = 2.0 Hz, *J*<sub>Sn-H</sub> = 71.6 Hz, 1 H), 4.47 (s, 2 H), 4.21 (d, *J* = 1.6 Hz, *J*<sub>Sn-H</sub> = 13.6 Hz, 2 H), 1.24 (s, 12 H), 0.17 (s, 9 H, *J*<sub>Sn-H</sub> = 26.8 Hz); <sup>13</sup>C NMR (100 MHz, CDCl<sub>3</sub>) δ 171.89, 138.74, 128.48, 127.78, 127.59, 83.57, 79.58, 77.43, 72.33, 25.02, -7.42; IR (neat, cm<sup>-1</sup>): 2977.0, 2924.1, 2858.1, 2339.8, 1683.9, 1540.0, 1495.6, 1351.8, 1096.1, 967.5; MS (ESI): *m/z*: 461.11 [M+Na]<sup>+</sup>.

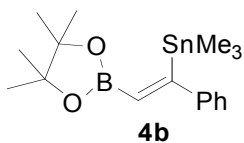

**4b**

**Borostannylation of phenylacetylene: synthesis of the compound 4b:**

Compound **4b** was synthesized from phenylacetylene in 82 % isolated yield using the general procedure described above. <sup>1</sup>H NMR (400 MHz, CDCl<sub>3</sub>) δ 7.27 (d, *J* = 6.8 Hz, 2 H), 7.17 (t, *J* = 6.0 Hz, 1 H), 7.02 (d, *J* = 6.8 Hz, 2 H), 6.26 (s, *J*<sub>Sn-H</sub> = 72.0 Hz, 1 H), 1.28 (s, 12 H), 0.16 (s, *J*<sub>Sn-H</sub> = 26.8 Hz, 9 H); <sup>13</sup>C NMR (100 MHz, CDCl<sub>3</sub>) δ 176.23, 149.36, 128.10,

126.35, 83.69, 25.08, -5.62; IR (neat, cm<sup>-1</sup>): 2977.7, 2924.9, 2539.4, 1683.8, 1558.2, 1487.1, 1338.7, 1143.0, 968.9, 846.4; MS (ESI): *m/z*: 417.08 [M+Na]<sup>+</sup>.

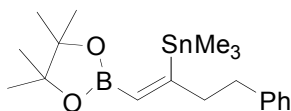

**4c**

**Borostannylation of 4-phenyl-1-butyne: synthesis of the compound 4c:**

Compound **4c** was synthesized from 4-phenyl-1-butyne in 81 % isolated yield using the general procedure described above. <sup>1</sup>H NMR (400 MHz, CDCl<sub>3</sub>) δ 7.26 (d, *J* = 7.6 Hz, 2H), 7.17-7.148 (m, 3H), 6.15 (s, *J*<sub>Sn-H</sub> =

82.8 Hz, 1H), 2.63 (s, 4H), 1.24 (s, 12H), 0.18 (s, *J*<sub>Sn-H</sub> = 26.4 Hz, 9H); <sup>13</sup>C NMR (100 MHz, CDCl<sub>3</sub>) δ 177.19, 142.22, 128.67, 128.53, 126.02, 83.47, 47.04, 36.37, 25.04, -5.84; IR (neat, cm<sup>-1</sup>): 2977.3, 2923.6, 2856.2, 2359.4, 1652.2, 1495.4, 1455.8, 1535.2, 1234.7, 1146.2; MS (ESI): *m/z*: 445.12 [M+Na]<sup>+</sup>.

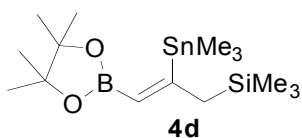

**Borostannylation of trimethyl(propargyl)silane: synthesis of the compound 4d:** Compound **4d** was synthesized from trimethyl(propargyl)silane in 80 % isolated yield using the general procedure described above.  $^1\text{H NMR}$  (500 MHz,  $\text{CDCl}_3$ )  $\delta$  5.87 (s,

$J_{\text{Sn-H}} = 79$  Hz, 1 H), 2.05 (s,  $J_{\text{Sn-H}} = 49.5$  Hz, 2 H), 1.23 (12 H), 0.14 (s, 9H,  $J_{\text{Sn-H}} = 27$  Hz), -0.24 (s, 9 H);  $^{13}\text{C NMR}$  (100 MHz,  $\text{CDCl}_3$ )  $\delta$  176.36, 83.16, 53.62, -1.23, -6.82; IR (neat,  $\text{cm}^{-1}$ ): 2924.4, 2859.0, 2359.4, 1652.2, 1558.1, 1349.9, 1133.9, 1026.1, 824.5; MS (ESI):  $m/z$ : 427.03  $[\text{M}+\text{Na}]^+$ .

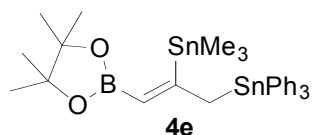

**Borostannylation of triphenyl(2-propynyl)stannane: synthesis of the compound 4e:** Compound **4e** was synthesized from triphenyl(2-propynyl)stannane in 80 % isolated yield using the general procedure described above.

$^1\text{H NMR}$  (400 MHz,  $\text{CDCl}_3$ )  $\delta$  7.60-7.40 (m, 6 H), 7.362-7.326 (m, 9 H), 6.07 (s,  $J_{\text{Sn-H}} = 84$ , 20 Hz, 1 H), 2.99 (d,  $J = 0.8$  Hz,  $J_{\text{Sn-H}} = 44$ , 36 Hz, 2 H), 1.19 (12 H), -0.11 (s,  $J_{\text{Sn-H}} = 27$  Hz, 9 H);  $^{13}\text{C NMR}$  (100 MHz,  $\text{CDCl}_3$ )  $\delta$  138.60, 137.50, 129.18, 128.43, 83.13, 24.90, -0.6; IR (neat,  $\text{cm}^{-1}$ ): 3063.8, 2924.3, 2359.7, 1733.6, 1558.3, 1348.3, 1143.8; MS (ESI):  $m/z$ : 701.08  $[\text{M}+\text{Na}]^+$ .

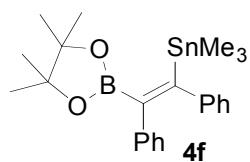

**Borostannylation of piperonylacetylene: synthesis of the compound 4f:** Compound **4f** was synthesized from dipenylacetylene in 84 % isolated yield using the general procedure described above.  $^1\text{H NMR}$  (400 MHz,  $\text{CDCl}_3$ )  $\delta$  6.95-6.87 (m, 8 H), 6.62 (d,  $J = 7.6$  Hz, 2 H), 1.28 (s, 12 H), 0.08 (s, 9H,  $J_{\text{Sn-H}} = 26$  Hz, 9 H);  $^{13}\text{C NMR}$  (100 MHz,  $\text{CDCl}_3$ )  $\delta$  170.38, 146.82, 142.56, 129.72, 127.54, 127.14, 127.01, 126.93, 125.29, 124.57, 84.22, 77.44, 25.04, -4.86. IR (neat,  $\text{cm}^{-1}$ ): 2923.8, 1732.9, 1652.0, 1557.9, 1493.9, 1455.9, 1049.4; MS (ESI):  $m/z$ : 493.13  $[\text{M}+\text{Na}]^+$ .

**Borostannylation of 1-phenyl-1-propyne: synthesis of the compounds 4g1 and 4g2:** Borostannylation of 1-phenyl-1-propyne using the general procedure described above yielded the two region isomers **4g1** and **4g2** in 88:12 ratio respectively in 90 % combined isolated yield.

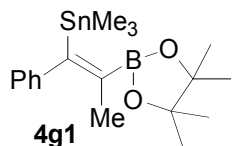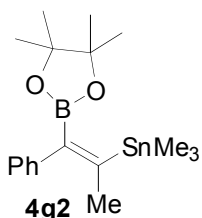

**4g1:**  $^1\text{H NMR}$  (500 MHz,  $\text{CDCl}_3$ )  $\delta$  7.26 (t,  $J = 7.2$  Hz, 2 H), 7.06 (t,  $J = 7.2$  Hz, 1 H), 6.78 (d,  $J = 7.2$  Hz, 1 H), 1.64 (t,  $J = 5.5$  Hz, 3 H), 1.28 (s, 12 H), -0.02 (t,  $J = 26.0$  Hz, 9 H);  $^{13}\text{C NMR}$  (125 MHz,  $\text{CDCl}_3$ )  $\delta$  167.79, 147.50, 128.18, 127.84, 125.93, 124.81, 83.91, 25.12, 18.92, -5.32; IR (neat,  $\text{cm}^{-1}$ ): 2977.9, 2923.7, 2856.6, 1683.7, 1575.3, 1488.3, 1352.1, 1308.0, 1114.2, 760.9; MS (ESI):  $m/z$ : 431.11  $[\text{M}+\text{Na}]^+$ .

**4g2:**  $^1\text{H}$  NMR (500 MHz,  $\text{CDCl}_3$ )  $\delta$  7.27 (t,  $J = 7.6$  Hz, 2 H), 7.16 (t,  $J = 7.6$  Hz, 1 H), 7.02 (d,  $J = 7.6$  Hz, 1 H), 1.89 (t,  $J = 28.5$  Hz, 3 H), 1.21 (s, 12 H), 0.19 (t,  $J = 27.0$  Hz, 9 H).

**Borostannylation of 1-phenyl-1-butyne: synthesis of the compounds 4h1 and 4h2:** Borostannylation of 1-phenyl-1-butyne using the general procedure described above yielded the two region isomers **4h1** and **4h2** in 85:15 ratio respectively in 89 % combined isolated yield. Regioselectivity was improved to 94:6 when the reaction was run at 60°C for 12 h. in the presence of  $\text{PdCl}_2(\text{CH}_3\text{CN})_2$ ,  $\text{P}(t\text{-Bu})_3$ .

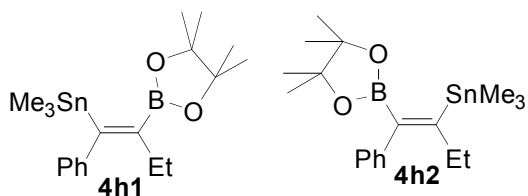

**4h1:**  $^1\text{H}$  NMR (500 MHz,  $\text{CDCl}_3$ )  $\delta$  7.25 (t,  $J = 7.5$  Hz, 2 H), 7.06 (t,  $J = 7.5$  Hz, 1 H), 6.78 (d,  $J = 7.5$  Hz, 2 H), 2.03 (q,  $J = 10.0$  Hz, 2 H), 1.28 (s, 12 H), 0.85 (t,  $J = 10.0$  Hz, 3 H), -0.03 (t,  $J = 26.0$  Hz, 9 H);  $^{13}\text{C}$  NMR (125 MHz,  $\text{CDCl}_3$ )  $\delta$  166.37, 147.38, 128.04, 125.95, 125.88, 125.81, 124.67, 83.77, 26.32, 25.08, 15.70, -5.06; IR (neat,  $\text{cm}^{-1}$ ): 2976.9, 2926.0, 2867.9, 1683.8, 1488.5, 1351.7, 1128.9, 968.4, 867.8; MS (ESI):  $m/z$ : 443.14  $[\text{M}+\text{Na}]^+$ .

**4h2:**  $^1\text{H}$  NMR (500 MHz,  $\text{CDCl}_3$ )  $\delta$  7.26 (t,  $J = 7.5$  Hz, 2 H), 7.17 (t,  $J = 7.5$  Hz, 1 H), 6.99 (d,  $J = 7.5$  Hz, 2 H), 2.30-2.10 (m, 2 H), 1.20 (s, 12 H), 0.80 (t,  $J = 8.2$  Hz, 3 H), 0.19 (t,  $J = 26.0$  Hz, 9 H)

**Effect of ligands in improving the regioselectivity of the borostannylation of the internal unsymmetrical acetylene 2h [Table]**

| entry | reaction conditions                                                                                                                               | ratio of <b>4h1</b> : <b>4h2</b> (% yield) |
|-------|---------------------------------------------------------------------------------------------------------------------------------------------------|--------------------------------------------|
| 1     | a) $\text{PdCl}_2(\text{PPh}_3)_2$ , $\text{C}_6\text{H}_6$ , rt, 2h.<br>b) PTSA, Pinacol, rt. 12h.                                               | 86 : 13 (89)                               |
| 2     | a) $\text{PdCl}_2(\text{CH}_3\text{CN})_2$ , $\text{C}_6\text{H}_6$ , 80 °C, 12h.<br>b) PTSA, Pinacol, rt. 12h.                                   | No reaction, recovered starting material   |
| 3     | a) $\text{PdCl}_2(\text{CH}_3\text{CN})_2$ , $\text{P}(o\text{-tolyl})_3$ , $\text{C}_6\text{H}_6$ , rt, 6h.<br>b) PTSA, Pinacol, rt. 12h., 82%   | 87 : 13 (82)                               |
| 4     | a) $\text{Pd}_2(\text{dba})_3$ , $\text{CHCl}_3$ , $\text{P}(o\text{-tolyl})_3$ , $\text{C}_6\text{H}_6$ , rt, 24h.<br>b) PTSA, Pinacol, rt. 12h. | 87 : 13 (82)                               |
| 5     | a) $\text{PdCl}_2(\text{CH}_3\text{CN})_2$ , $\text{P}(t\text{-Bu})_3$ , $\text{C}_6\text{H}_6$ , 60 °C, 12h.<br>b) PTSA, Pinacol, rt. 12h.       | 94 : 6 (75)                                |
| 6     | $\text{PdCl}_2(\text{CH}_3\text{CN})_2$ , <b>L1</b> , $\text{C}_6\text{H}_6$ , rt to 60 °C, 6h.                                                   | No reaction, recovered starting material   |
| 7     | $\text{Pd}_2(\text{dba})_3$ , $\text{CHCl}_3$ , <b>L1</b> , $\text{C}_6\text{H}_6$ , rt to 60 °C, 24h.                                            | No reaction, recovered starting material   |

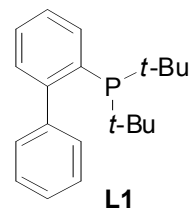

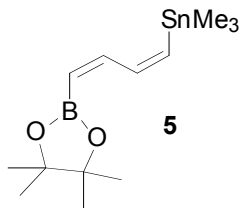

**Borostannylation of acetylene: synthesis of the compound 5:** Solution of mixture of 1,3-dimethyl-2-(trimethylstannyl)-2-bora-1,3-diazocyclopentane (156 mg, 0.6 mmol) and PdCl<sub>2</sub>(PPh<sub>3</sub>)<sub>2</sub> (3.5 mg, 0.005 mmol) in benzene (4 mL) was stirred at room temperature for 6 h under acetylene atmosphere (balloon pressure). After stirring the reaction mixture at room temperature for 6 h, a solution of pinacol (84 mg, 0.72 mmol) in benzene (0.5 mL) followed by *p*-toluenesulfonic acid (*p*-TSA, 136 mg, 0.72 mmol) were added. After 2 h, the reaction was

quenched by the addition of Et<sub>3</sub>N (0.12 mL, 0.86 mmol) and the solvent was evaporated under reduced pressure to afford the crude product, which was purified by silica gel chromatography using 2% EtOAc/hexane as the mobile phase to yield the desired product **5** in 86 % isolated yield. <sup>1</sup>H NMR (400 MHz, CDCl<sub>3</sub>) δ 7.69 (t, *J* = 12 Hz, *J*<sub>Sn-H</sub> = 75 Hz, 1 H), 6.79 (t, *J* = 13.5 Hz, 1 H), 6.38 (d, *J* = 12.5 Hz, *J*<sub>Sn-H</sub> = 24.5 Hz, 1 H), 5.47 (d, *J* = 13.5 Hz, 1 H), 1.26 (s, 12 H), 0.18 (s, *J*<sub>Sn-H</sub> = 28 Hz, 9 H); <sup>13</sup>C NMR (400 MHz, CDCl<sub>3</sub>) δ 151.93, 146.48, 141.08, 83.40, 25.08, -0.8; IR (neat, cm<sup>-1</sup>): 2977.9, 2939.6, 1733.4, 1606.3, 1418.2, 1143.1; MS (ESI): *m/z*: 367.079 [M+Na]<sup>+</sup>.

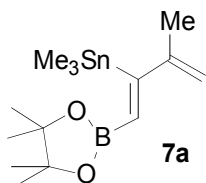

**Borostannylation of 2-methyl-1-buten-3-yne: synthesis of the compound 7a:** Compound **7a** was synthesized from 2-Methyl-1-buten-3-yne **6a** in 84 % isolated yield using the general procedure described above. <sup>1</sup>H NMR (500 MHz, CDCl<sub>3</sub>) δ 6.12 (t, *J* = 87.6 Hz, 1 H), 4.74 (s, 1 H), 4.57 (s, 1 H), 1.78 (s, 3 H), 1.24 (s, 12 H), 0.18 (t, *J* = 20.0 Hz, 9H);

<sup>13</sup>C NMR (125 MHz, CDCl<sub>3</sub>) δ 178.17, 152.96, 110.50, 83.57, 25.07, 22.49, -0.46; IR (neat, cm<sup>-1</sup>): 2926.1, 2339.9, 1733.6, 1576.0, 1456.3, 1338.0, 1727.8, 1144.2, 960.5.

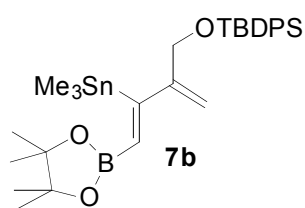

**Borostannylation of alkyne 6b: synthesis of the compound 7b:**

Compound **7b** was synthesized from alkyne **6b** in 82 % isolated yield using the general procedure described above. <sup>1</sup>H NMR (400 MHz, CDCl<sub>3</sub>) δ 7.66 (d, *J* = 7.6 Hz, 4 H), 7.48-7.30 (m, 6 H), 6.05 (t, *J* = 92.0 Hz, 1 H), 5.24 (s, 1 H), 4.70 (s, 1 H), 4.14 (s, 2 H), 1.22 (s, 12 H), 1.04 (s, 9 H), 0.13 (t, *J* = 26.4 Hz, 9 H);

<sup>13</sup>C NMR (100 MHz, CDCl<sub>3</sub>) δ 174.53, 154.97, 135.73, 133.85, 129.80, 127.86, 107.73, 83.59, 65.25, 27.04, 25.01, 19.53, -5.04; IR (neat, cm<sup>-1</sup>): 2928.8, 2856.3, 2359.5, 1575.8, 1472.0, 1337.6, 1111.2, 969.1, 885.9; MS (ESI): *m/z*: 635.19 [M+Na]<sup>+</sup>.

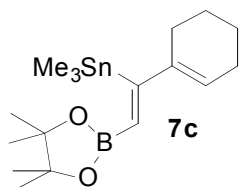

**Borostannylation of 1-Ethynylcyclohexene: synthesis of the compound 7c:**

Compound **7c** was synthesized from 1-ethynylcyclohexene **6c** in 85 % isolated yield using the general procedure described above. <sup>1</sup>H NMR (400 MHz, CDCl<sub>3</sub>) δ 6.07 (t, *J* = 92.0 Hz, 1 H), 5.46-5.35 (bs, 1 H), 2.16-1.98 (m, 4 H), 1.68-1.49 (m, 4 H), 1.24 (s, 12 H), 0.16 (t, *J* = 28 Hz, 9 H);

<sup>13</sup>C NMR (125 MHz, CDCl<sub>3</sub>) δ 178.68, 145.46, 124.18, 83.43, 27.98, 25.73, 25.06, 23.11, 22.54; IR (neat, cm<sup>-1</sup>): 2976.8, 2926.3, 1733.2, 1652.1, 1558.1, 1335.9, 1143.5, 969.5, 768.7; MS (ESI): *m/z*: 421.13 [M+Na]<sup>+</sup>.

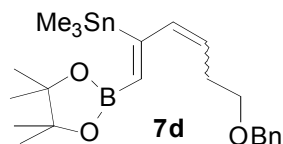

#### Borostannylation of alkyne **6d**: synthesis of the compound **7d**:

Compound **7d** was synthesized from alkyne **6d** in 81 % isolated yield using the general procedure described above.  $^1\text{H NMR}$  (500 MHz,  $\text{CDCl}_3$ )  $\delta$  7.31-7.23 (m, 10 H), 6.34 (dd,  $J = 15.5, 1.0$  Hz, 1 H), 6.22 (dd,  $J = 11.5, 2.0$  Hz, 1 H), 6.17 (d,  $J = 1.0$  Hz, 1 H),

6.07 (d,  $J = 2.0$  Hz, 1 H), 5.82-5.72 (m, 1 H), 5.34-5.27 (m, 1 H), 4.50 (s, 2 H), 4.47 (s, 2 H), 3.50 (t,  $J = 6.5$  Hz, 2 H), 3.44 (t,  $J = 7.0$  Hz, 2 H), 2.42-2.36 (m, 4 H), 1.29-1.19 (m, 24 H), 0.28-0.12 (m, 18 H); IR (neat,  $\text{cm}^{-1}$ ): 2976.8, 2924.3, 2855.9, 2359.5, 1575.8, 1455.8, 1343.5, 1143.1, 1103.8, 968.6, 850.7; MS (ESI):  $m/z$ : 501.15  $[\text{M}+\text{Na}]^+$ .

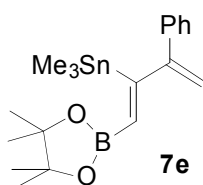

#### Borostannylation of alkyne **6e**: synthesis of the compound **7e**:

Compound **7e** was synthesized from alkyne **6e** in 10 % isolated yield using the general procedure described above.  $^1\text{H NMR}$  (500 MHz,  $\text{CDCl}_3$ )  $\delta$  7.22-7.05 (m, 5 H), 6.27 (s, 1 H), 5.17 (d,  $J = 1.5$  Hz, 1 H), 4.92 (d,  $J = 1.5$  Hz, 1 H), 1.51 (s, 12 H), 0.25 (t,  $J = 24.3$  Hz, 9 H).

#### Selective Stille Coupling followed by Suzuki Coupling:

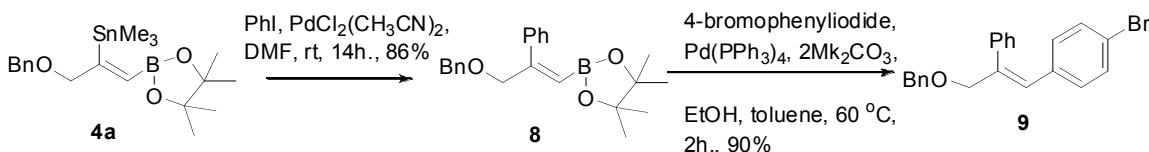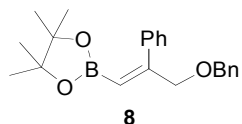

#### Selective Stille coupling: Synthesis of the compound **8**:

The substrate **4a** (20 mg, 0.05 mmol) in DMF (0.8 mL) was added  $\text{PdCl}_2(\text{CH}_3\text{CN})$  (0.6 mg, 0.0025 mmol) followed by the solution of iodobenzene (12 mg, 0.06 mmol) in DMF (0.2 mL), and the reaction mixture was stirred at the rt for

12 h. The reaction mixture was diluted with diethyl ether and washed successively with water, brine and dried over  $\text{Na}_2\text{SO}_4$ . The organic layer was evaporated under reduced pressure to afford the crude product which was purified by column chromatography on silica gel using 3% EtOAc/hexane as the eluent to yield **8** (15 mg, 0.04 mmol) in 86% yield as a viscous oil.  $^1\text{H NMR}$  (500 MHz,  $\text{CDCl}_3$ )  $\delta$  7.31-7.24 (m, 5H), 5.81 (t,  $J = 1.5$  Hz, 1H), 4.54 (s, 2H), 4.29 (d,  $J = 1.5$  Hz, 2H), 1.12 (s, 9H).

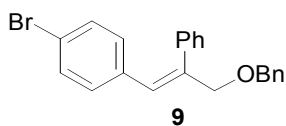

#### Suzuki Coupling for the Synthesis of **9**:

To the substrate **8** (8 mg, 0.025 mmol) in toluene (0.5 mL) under an atmosphere of nitrogen was added the 1-bromo-4-iodobenzene (14 mg, 0.05 mmol) in 0.32 mL toluene followed by 0.3 mL of 2 M potassium carbonate

solution and 0.3 mL EtOH. To this mixture was added *tetrakis*-(triphenylphosphine)palladium (1.5 mg), and the reaction was heated at 60 °C for 2 h. The reaction mixture was diluted with diethyl ether and the solution was washed successively with water, brine and dried over  $\text{Na}_2\text{SO}_4$ . The organic layer was evaporated under reduced pressure to afford the crude product which was purified by column chromatography on silica gel using 5 % EtOAc/hexane as the mobile phase to yield the compound **9** (8 mg, 0.022 mmol) in 90% yield as a viscous oil.  $^1\text{H NMR}$  (400 MHz,

CDCl<sub>3</sub>)  $\delta$  7.32-7.16 (m, 12H), 6.83 (d,  $J$  = 8.0 Hz, 2H), 6.63 (s, 1H), 4.59 (s, 2H), 4.29 (d,  $J$  = 1.2 Hz, 2H).

### Diels-Alder reaction of **7a**

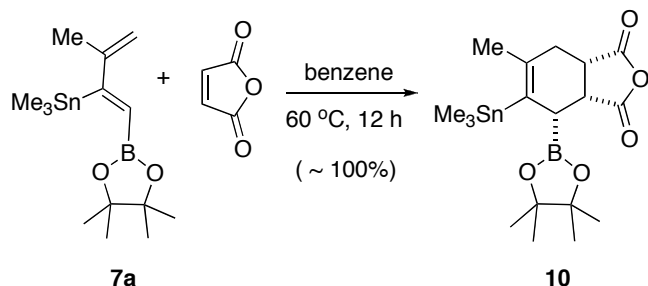

Diene **7a** (18 mg, 0.05 mmol) and maleic anhydride (10 mg, 0.05 mmol) in benzene (1.5 mL) were refluxed for 12 h. Evaporation of the solvent under reduced pressure yielded the desired product **10** in quantitative yield. <sup>1</sup>H NMR (500 MHz, CDCl<sub>3</sub>)  $\delta$  3.17-3.12 (m, 1 H), 3.05 (dd,  $J$  = 8.0, 11.0 Hz, 1 H), 2.71 (dd,  $J$  = 8.0, 30.0 Hz, 1 H), 2.53-2.42 (m, 2 H), 1.84 (dt,  $J$  = 25.0, 5.5 Hz, 3 H), 1.12 (s, 6 H), 1.09 (s, 6 H), 0.19 (t,  $J$  = 26 Hz, 9 H). The configuration was assigned as shown based on the ample literature precedents on reactions of similar compounds.

**Synthesis of enyne **6b****: Enyne **6b** was synthesized from the known compound **11**, which was obtained from the propargyl alcohol using the literature known procedure (*J. Org. Chem.* **2005**, *70*, 2364-2367).

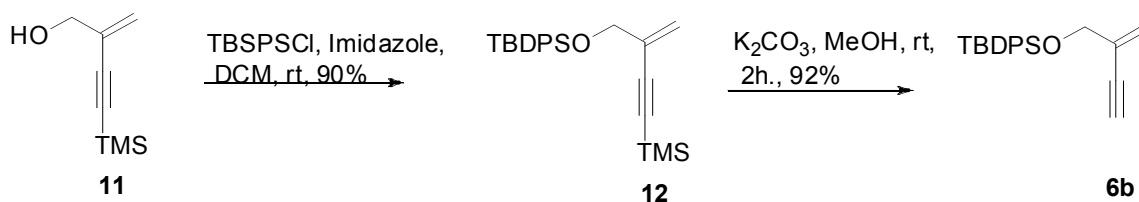

**Compound **12****: <sup>1</sup>H NMR (500 MHz, CDCl<sub>3</sub>)  $\delta$  7.54 (dd,  $J$  = 7.8, 2.0 Hz, 4 H), 7.30-7.23 (m, 6 H), 5.64 (d,  $J$  = 2.0 Hz, 1 H), 5.43 (d,  $J$  = 2.0 Hz, 1 H), 4.05 (t,  $J$  = 2.0 Hz, 2 H), 0.94 (s, 9 H), 0.03 (s, 9 H); IR (neat, cm<sup>-1</sup>): 2929.5, 2857.5, 2149.8, 1652.2, 1558.0, 1456.1, 1249.9, 1111.9, 824.5.

**6b**: <sup>1</sup>H NMR (500 MHz, CDCl<sub>3</sub>)  $\delta$  7.65 (d,  $J$  = 8.4 Hz, 4 H), 7.44-7.35 (m, 6 H), 5.82 (d,  $J$  = 2.0 Hz, 1 H), 5.60 (d,  $J$  = 2.0 Hz, 1 H), 4.18 (t,  $J$  = 2.0 Hz, 3 H), 2.85 (s, 1 H), 1.07 (s, 9 H); <sup>13</sup>C NMR (100 MHz, CDCl<sub>3</sub>)  $\delta$  135.70, 133.43, 130.0, 129.80, 127.97, 121.39, 81.94, 65.54, 26.99, 19.53; IR (neat, cm<sup>-1</sup>): 2928.3, 2857.4, 2539.4, 1652.2, 1539.9, 1456.1, 1111.2, 823.7; MS (ESI):  $m/z$ : 343.14 [M+Na]<sup>+</sup>.

**Synthesis of enyne **6e****: Enyne **6e** was synthesized from the phenyl acetylene using the procedure described for the synthesis of enyne **6b** from the propargyl alcohol. (*J. Org. Chem.* **2005**, *70*, 2364-2367).

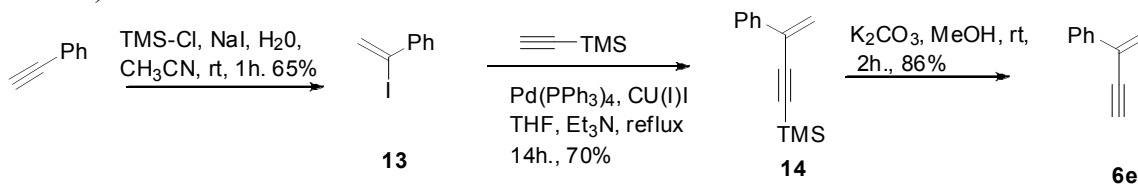

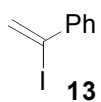

$^1\text{H}$  NMR (500 MHz,  $\text{CDCl}_3$ )  $\delta$  7.45 (dd,  $J = 8.0, 2.0$  Hz, 2 H), 7.27-7.19 (m, 3 H), 6.40 (d,  $J = 2.0$  Hz, 1 H), 6.02 (d,  $J = 2.0$  Hz, 1 H);  $^{13}\text{C}$  NMR (100 MHz,  $\text{CDCl}_3$ )  $\delta$  141.28, 129.14, 128.52, 128.37, 127.59, 107.88.

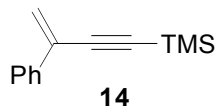

$^1\text{H}$  NMR (400 MHz,  $\text{CDCl}_3$ )  $\delta$  7.63 (dd,  $J = 7.8, 1.5$  Hz, 2 H), 7.36-7.29 (m, 3 H), 5.92 (s, 1 H), 5.70 (s, 1 H), 0.24 (s, 9 H);  $^{13}\text{C}$  NMR (100 MHz,  $\text{CDCl}_3$ )  $\delta$  137.16, 130.87, 128.59, 128.55, 126.28, 121.68, 104.33, 96.14, 0.18; IR (neat,  $\text{cm}^{-1}$ ): 2958.0, 2898.2, 2162.0, 2066.7, 1733.1, 1645.7, 1598.3, 1491.2, 1447.9, 1249.5, 1036.0, 842.0.

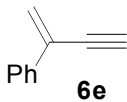

$^1\text{H}$  NMR (400 MHz,  $\text{CDCl}_3$ )  $\delta$  7.65 (d,  $J = 7.6$  Hz, 2 H), 7.37-7.28 (m, 3 H), 5.97 (s, 1 H), 5.75 (s, 1 H), 3.10 (s, 1 H);  $^{13}\text{C}$  NMR (100 MHz,  $\text{CDCl}_3$ )  $\delta$  136.85, 129.96, 128.66, 128.62, 126.20, 122.45, 82.98, 78.86; IR (neat,  $\text{cm}^{-1}$ ): 2925.1, 2857.0, 2162.0, 1733.0, 1652.2, 1493.8, 1448.2, 1397.7, 1049.6.



The Ohio State University  
Department of Chemistry  
NMR Facility  
400MHz - 0083

Current Data Parameters  
NAME Rs-3-171  
EXPNO 3  
PROCNO 1

F2 - Acquisition Parameters  
Date\_ 20090209  
Time 20.11  
INSTRUM spect  
PROBHD 5 mm QNP 1H/13  
PULPROG zg30  
TD 65536  
SOLVENT CDCl3  
NS 16  
DS 2  
SWH 8278.146 Hz  
FIDRES 0.126314 Hz  
AQ 3.9584243 sec  
RG 114  
DW 60.400 use  
DE 6.00 use  
TE 300.2 K  
D1 1.00000000 sec  
MCREST 0.00000000 sec  
MCWRK 0.01500000 sec

==== CHANNEL f1 =====  
NUC1 1H  
P1 13.00 use  
PL1 0.00 dB  
SFO1 400.1324710 MHz

F2 - Processing parameters  
SI 32768  
SF 400.1300179 MHz  
WDW EM  
SSB 0  
LB 0.30 Hz  
GB 0  
PC 1.00

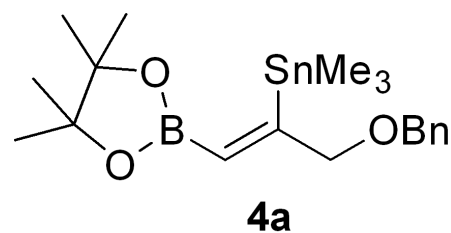

7.351  
7.318  
7.311  
7.305  
7.285  
7.275  
7.263  
7.256  
7.240  
6.423  
6.419

4.476  
4.251  
4.216  
4.212  
4.178

1.292  
1.241

0.241  
0.239  
0.172  
0.136  
0.104  
0.102  
0.053

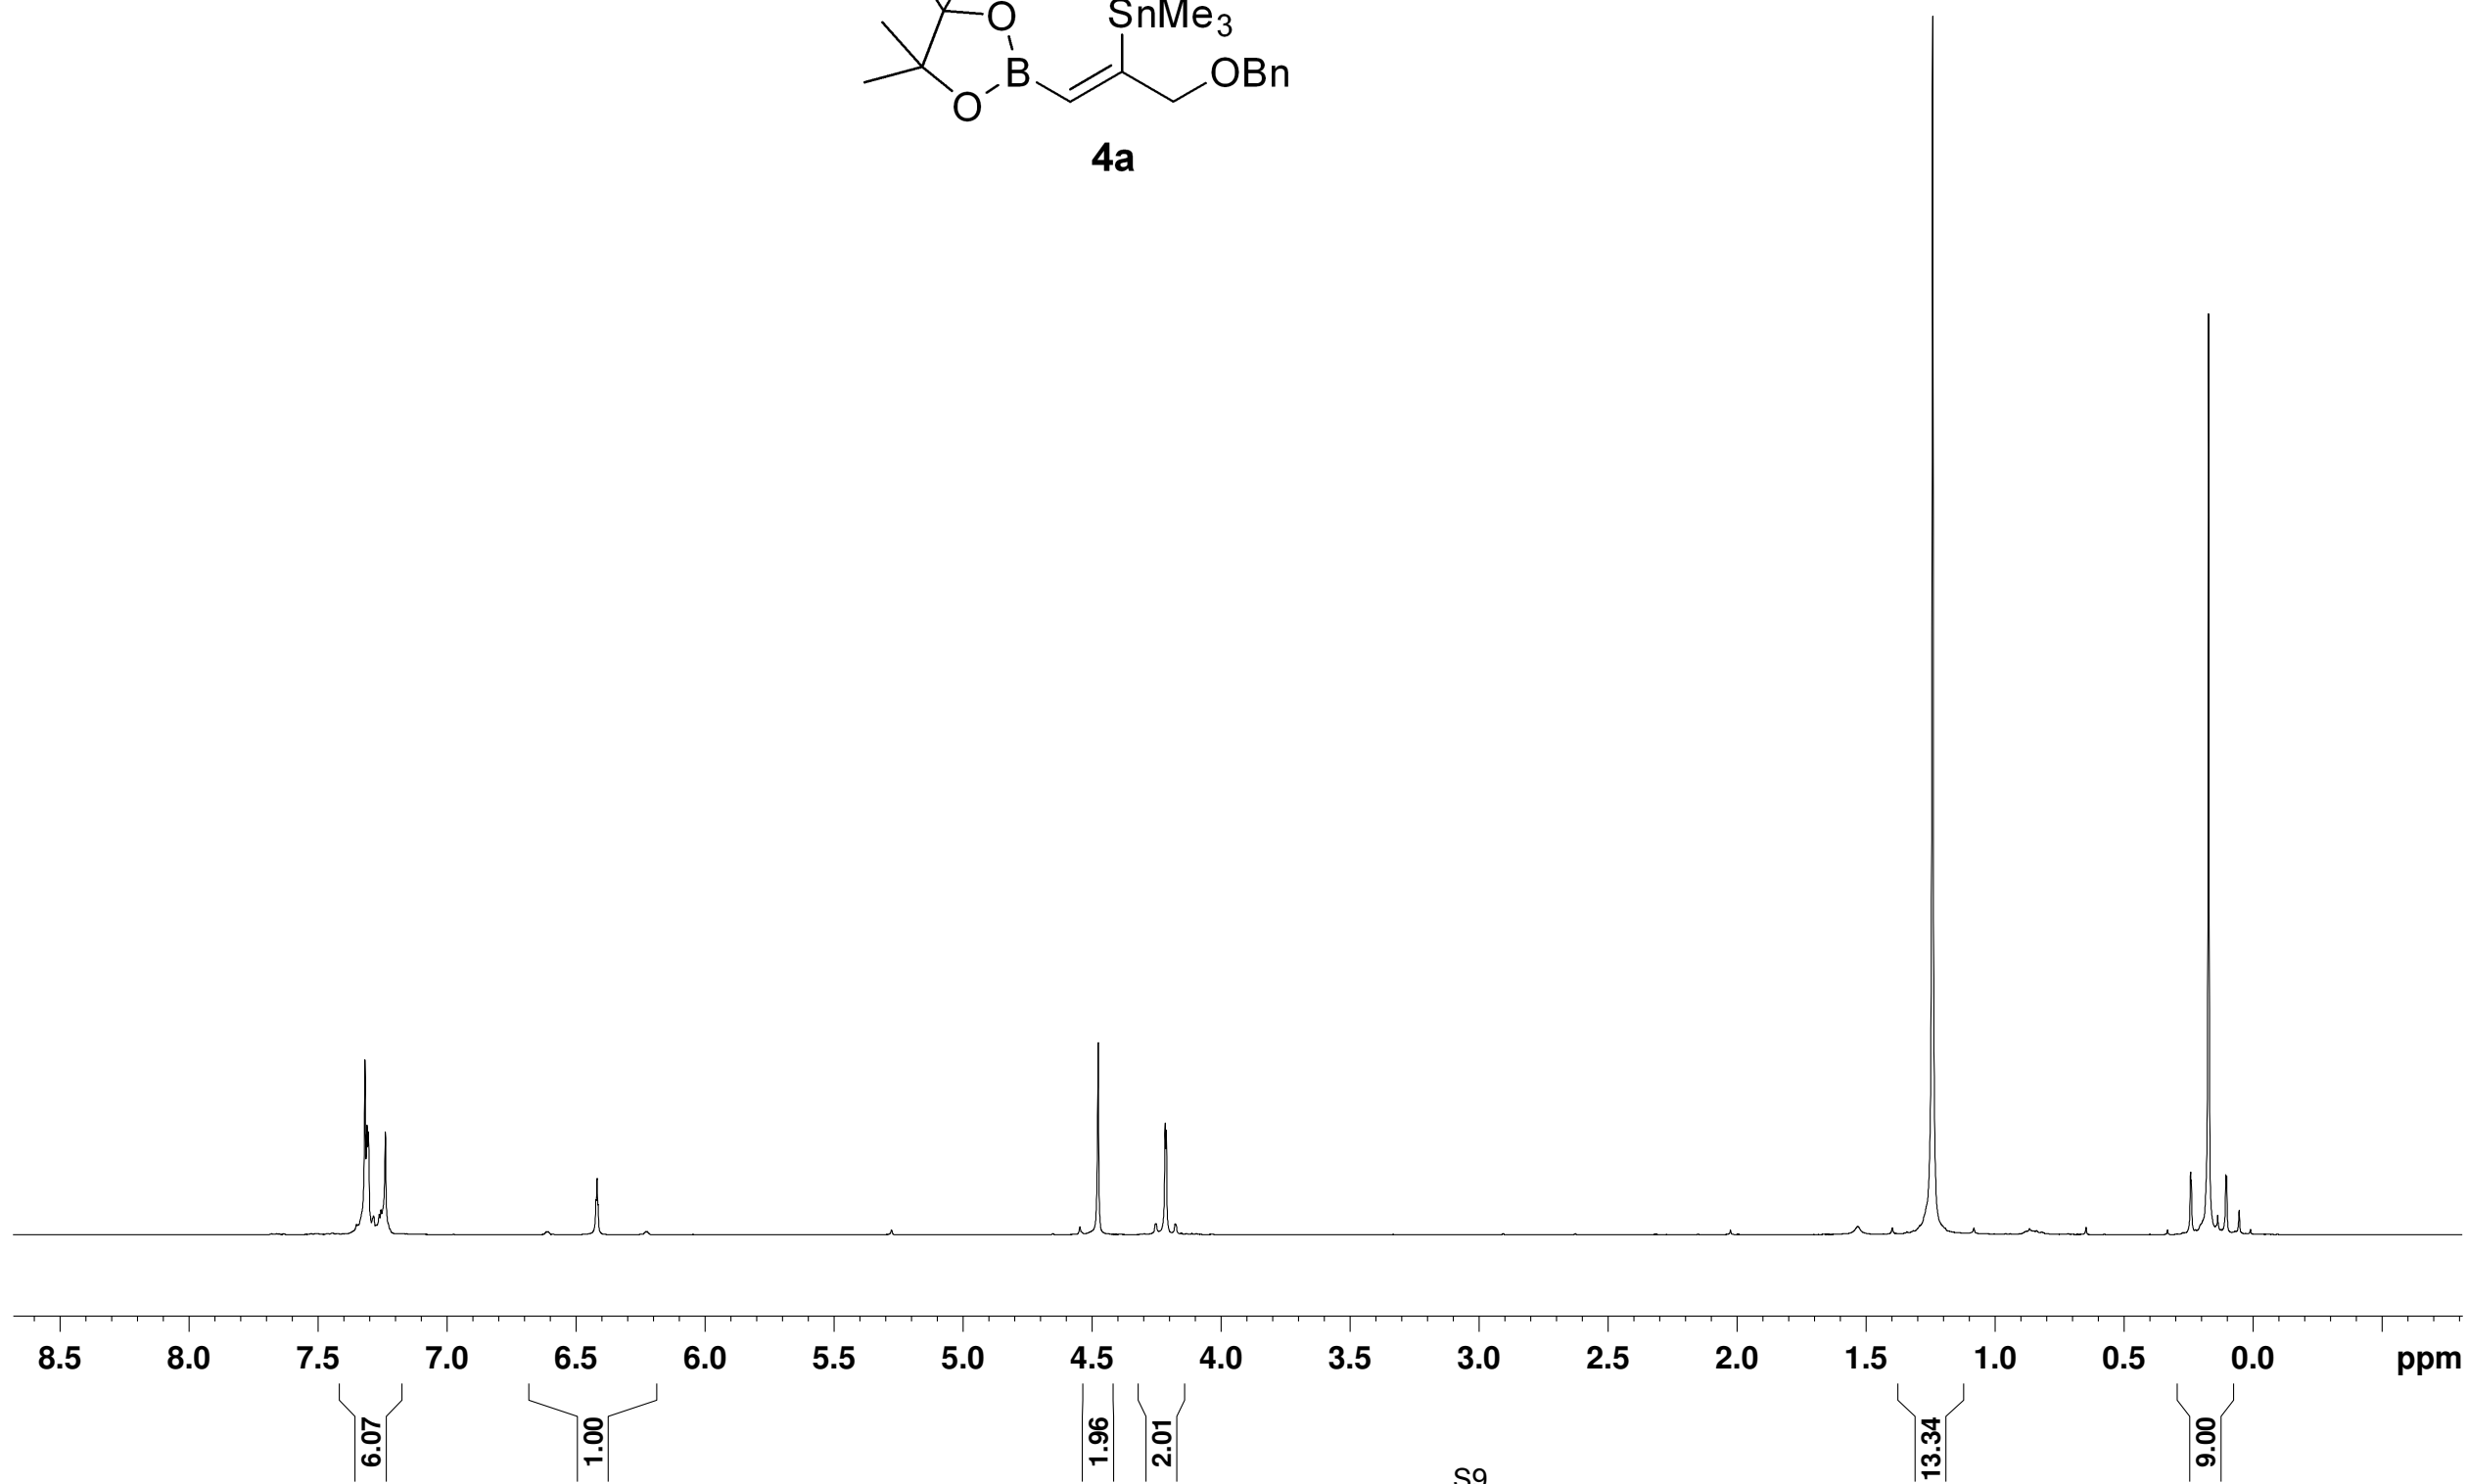



7.280  
7.276  
7.262  
7.240  
7.174  
7.171  
7.156  
7.037  
7.034  
7.017  
6.262

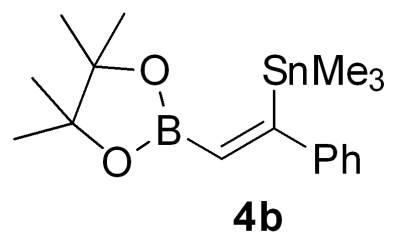

1.283  
1.241  
0.228  
0.226  
0.159  
0.093  
0.090  
0.055

The Ohio State University  
Department of Chemistry  
NMR Facility  
400MHz - 0083

Current Data Parameters  
NAME Rs-3-154  
EXPNO 4  
PROCNO 1

F2 - Acquisition Parameters  
Date\_ 20090203  
Time 14.40  
INSTRUM spect  
PROBHD 5 mm QNP 1H/13  
PULPROG zg30  
TD 65536  
SOLVENT CDCl3  
NS 16  
DS 2  
SWH 8278.146 Hz  
FIDRES 0.126314 Hz  
AQ 3.9584243 sec  
RG 912.3  
DW 60.400 use  
DE 6.00 use  
TE 300.2 K  
D1 1.00000000 sec  
MCREST 0.00000000 sec  
MCWRK 0.01500000 sec

==== CHANNEL f1 =====  
NUC1 1H  
P1 13.00 use  
PL1 0.00 dB  
SFO1 400.1324710 MHz

F2 - Processing parameters  
SI 32768  
SF 400.1300176 MHz  
WDW EM  
SSB 0  
LB 0.30 Hz  
GB 0  
PC 1.00

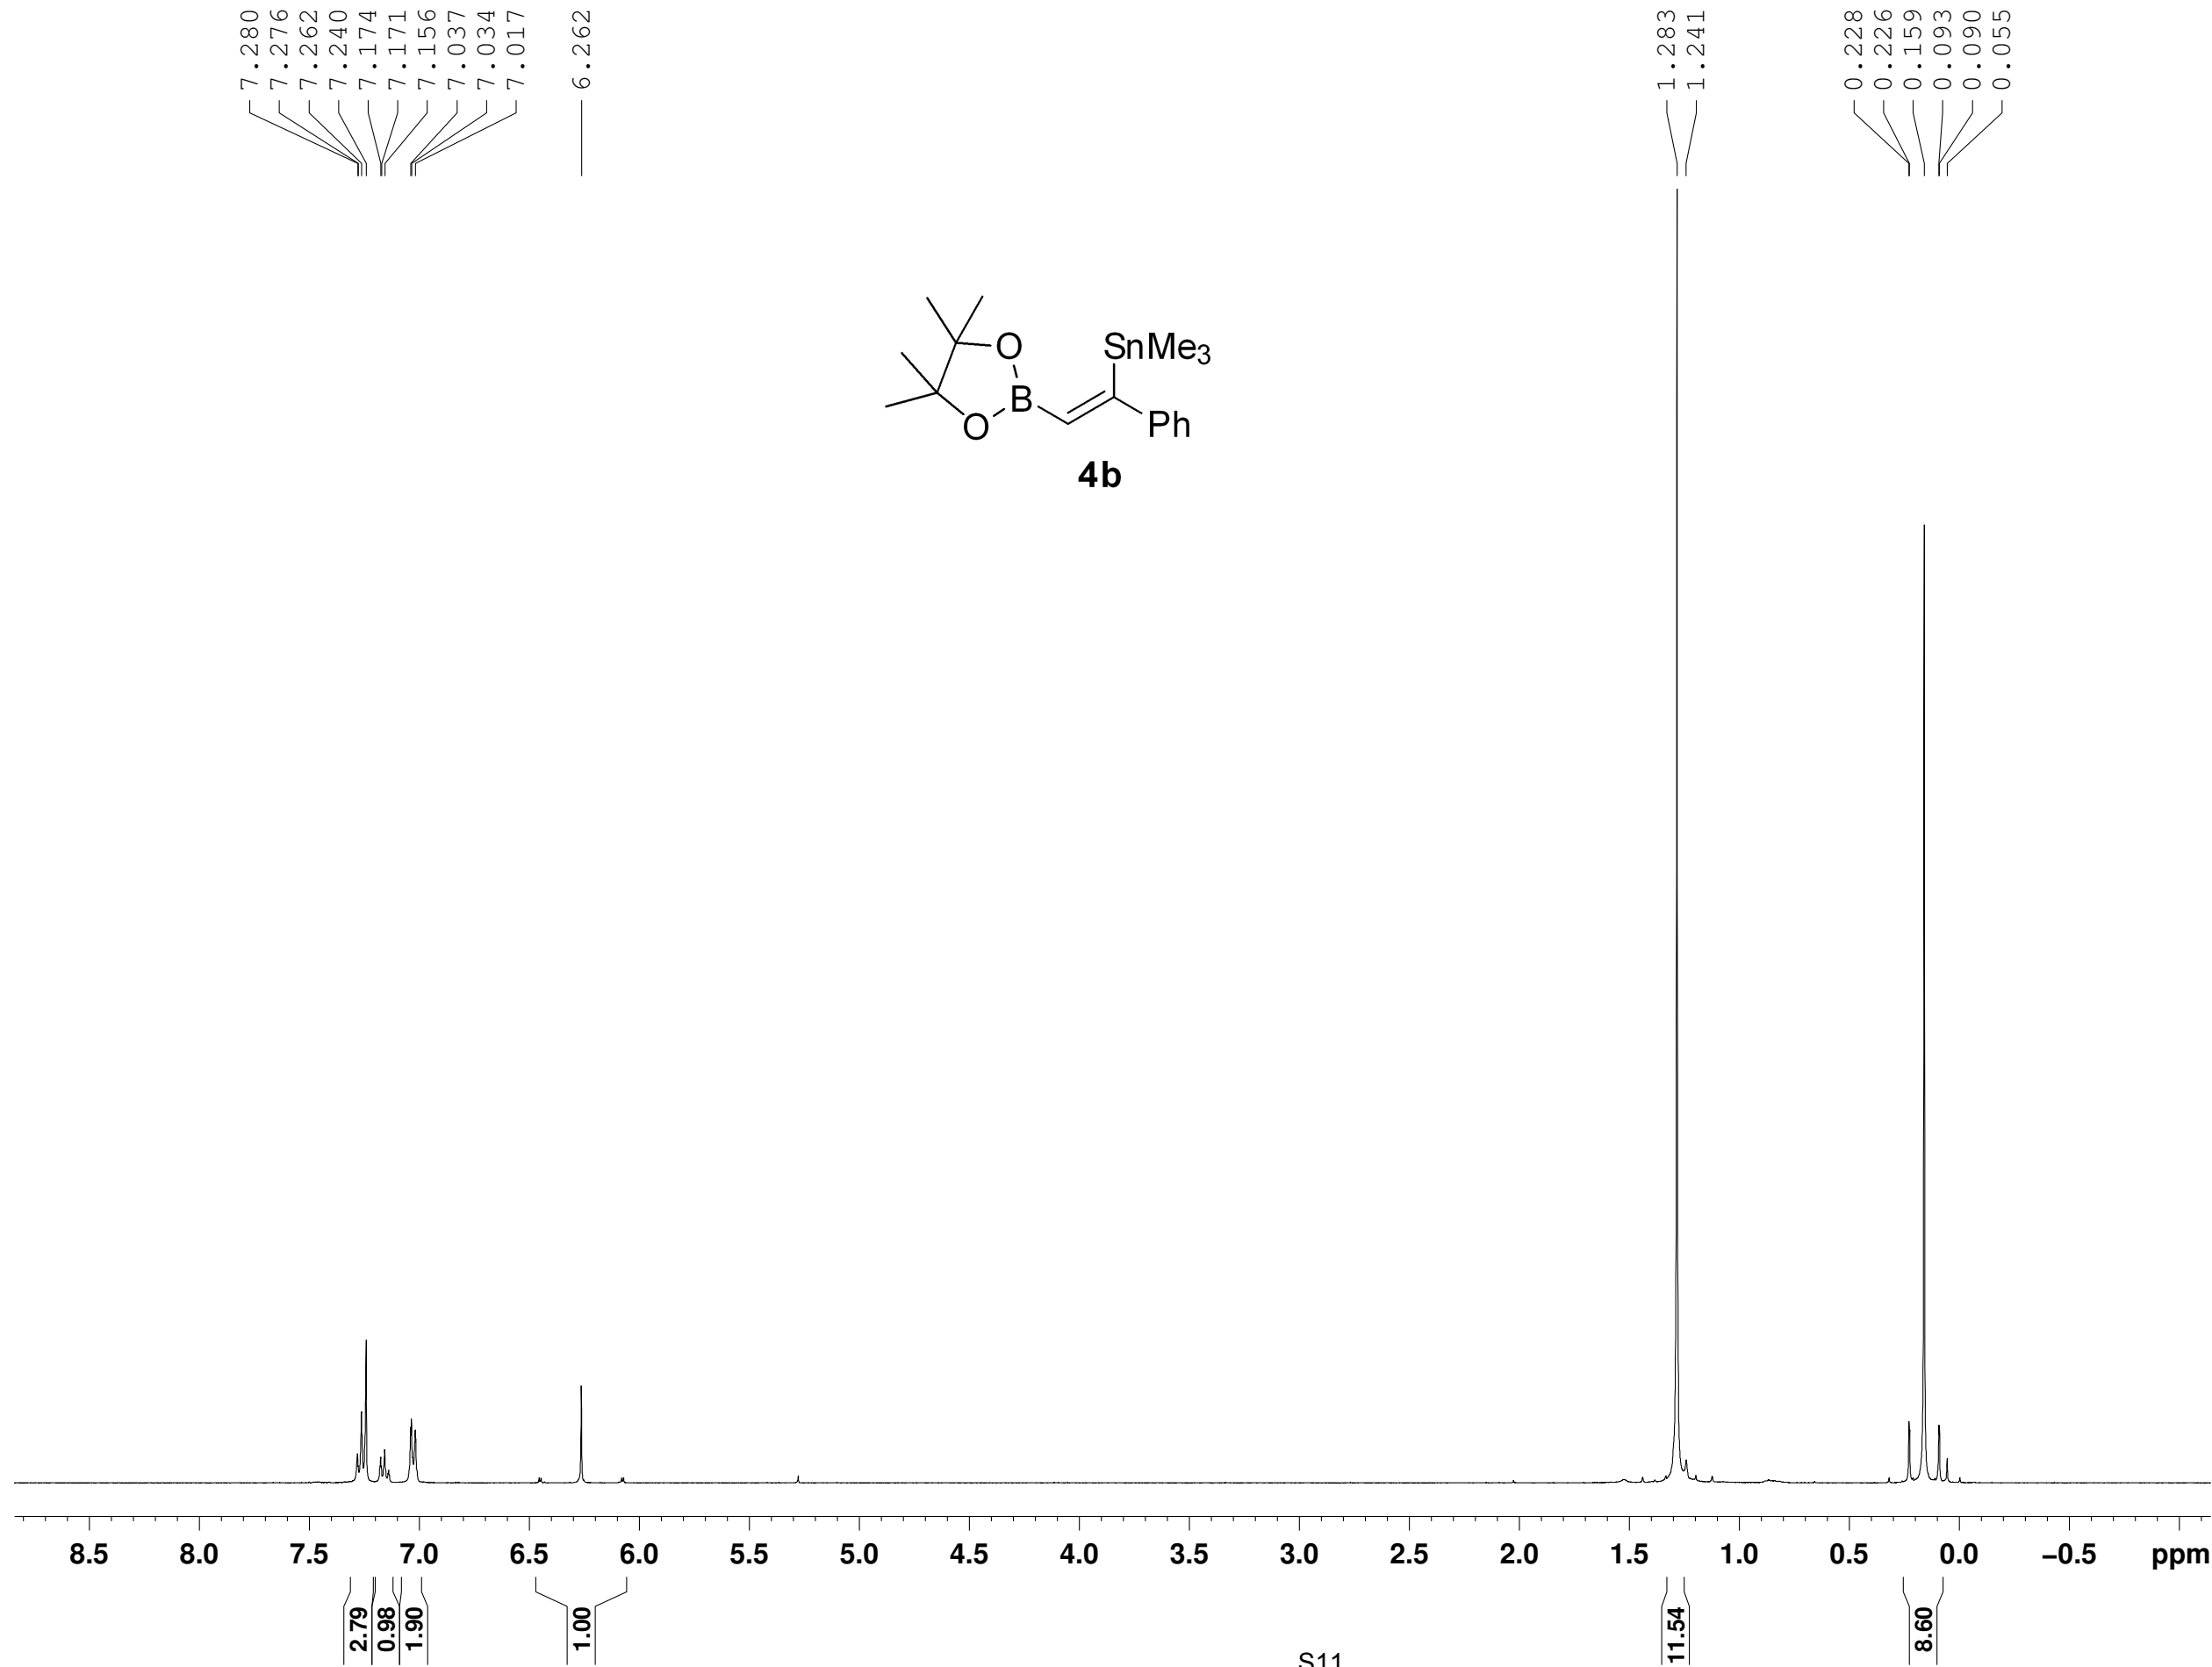

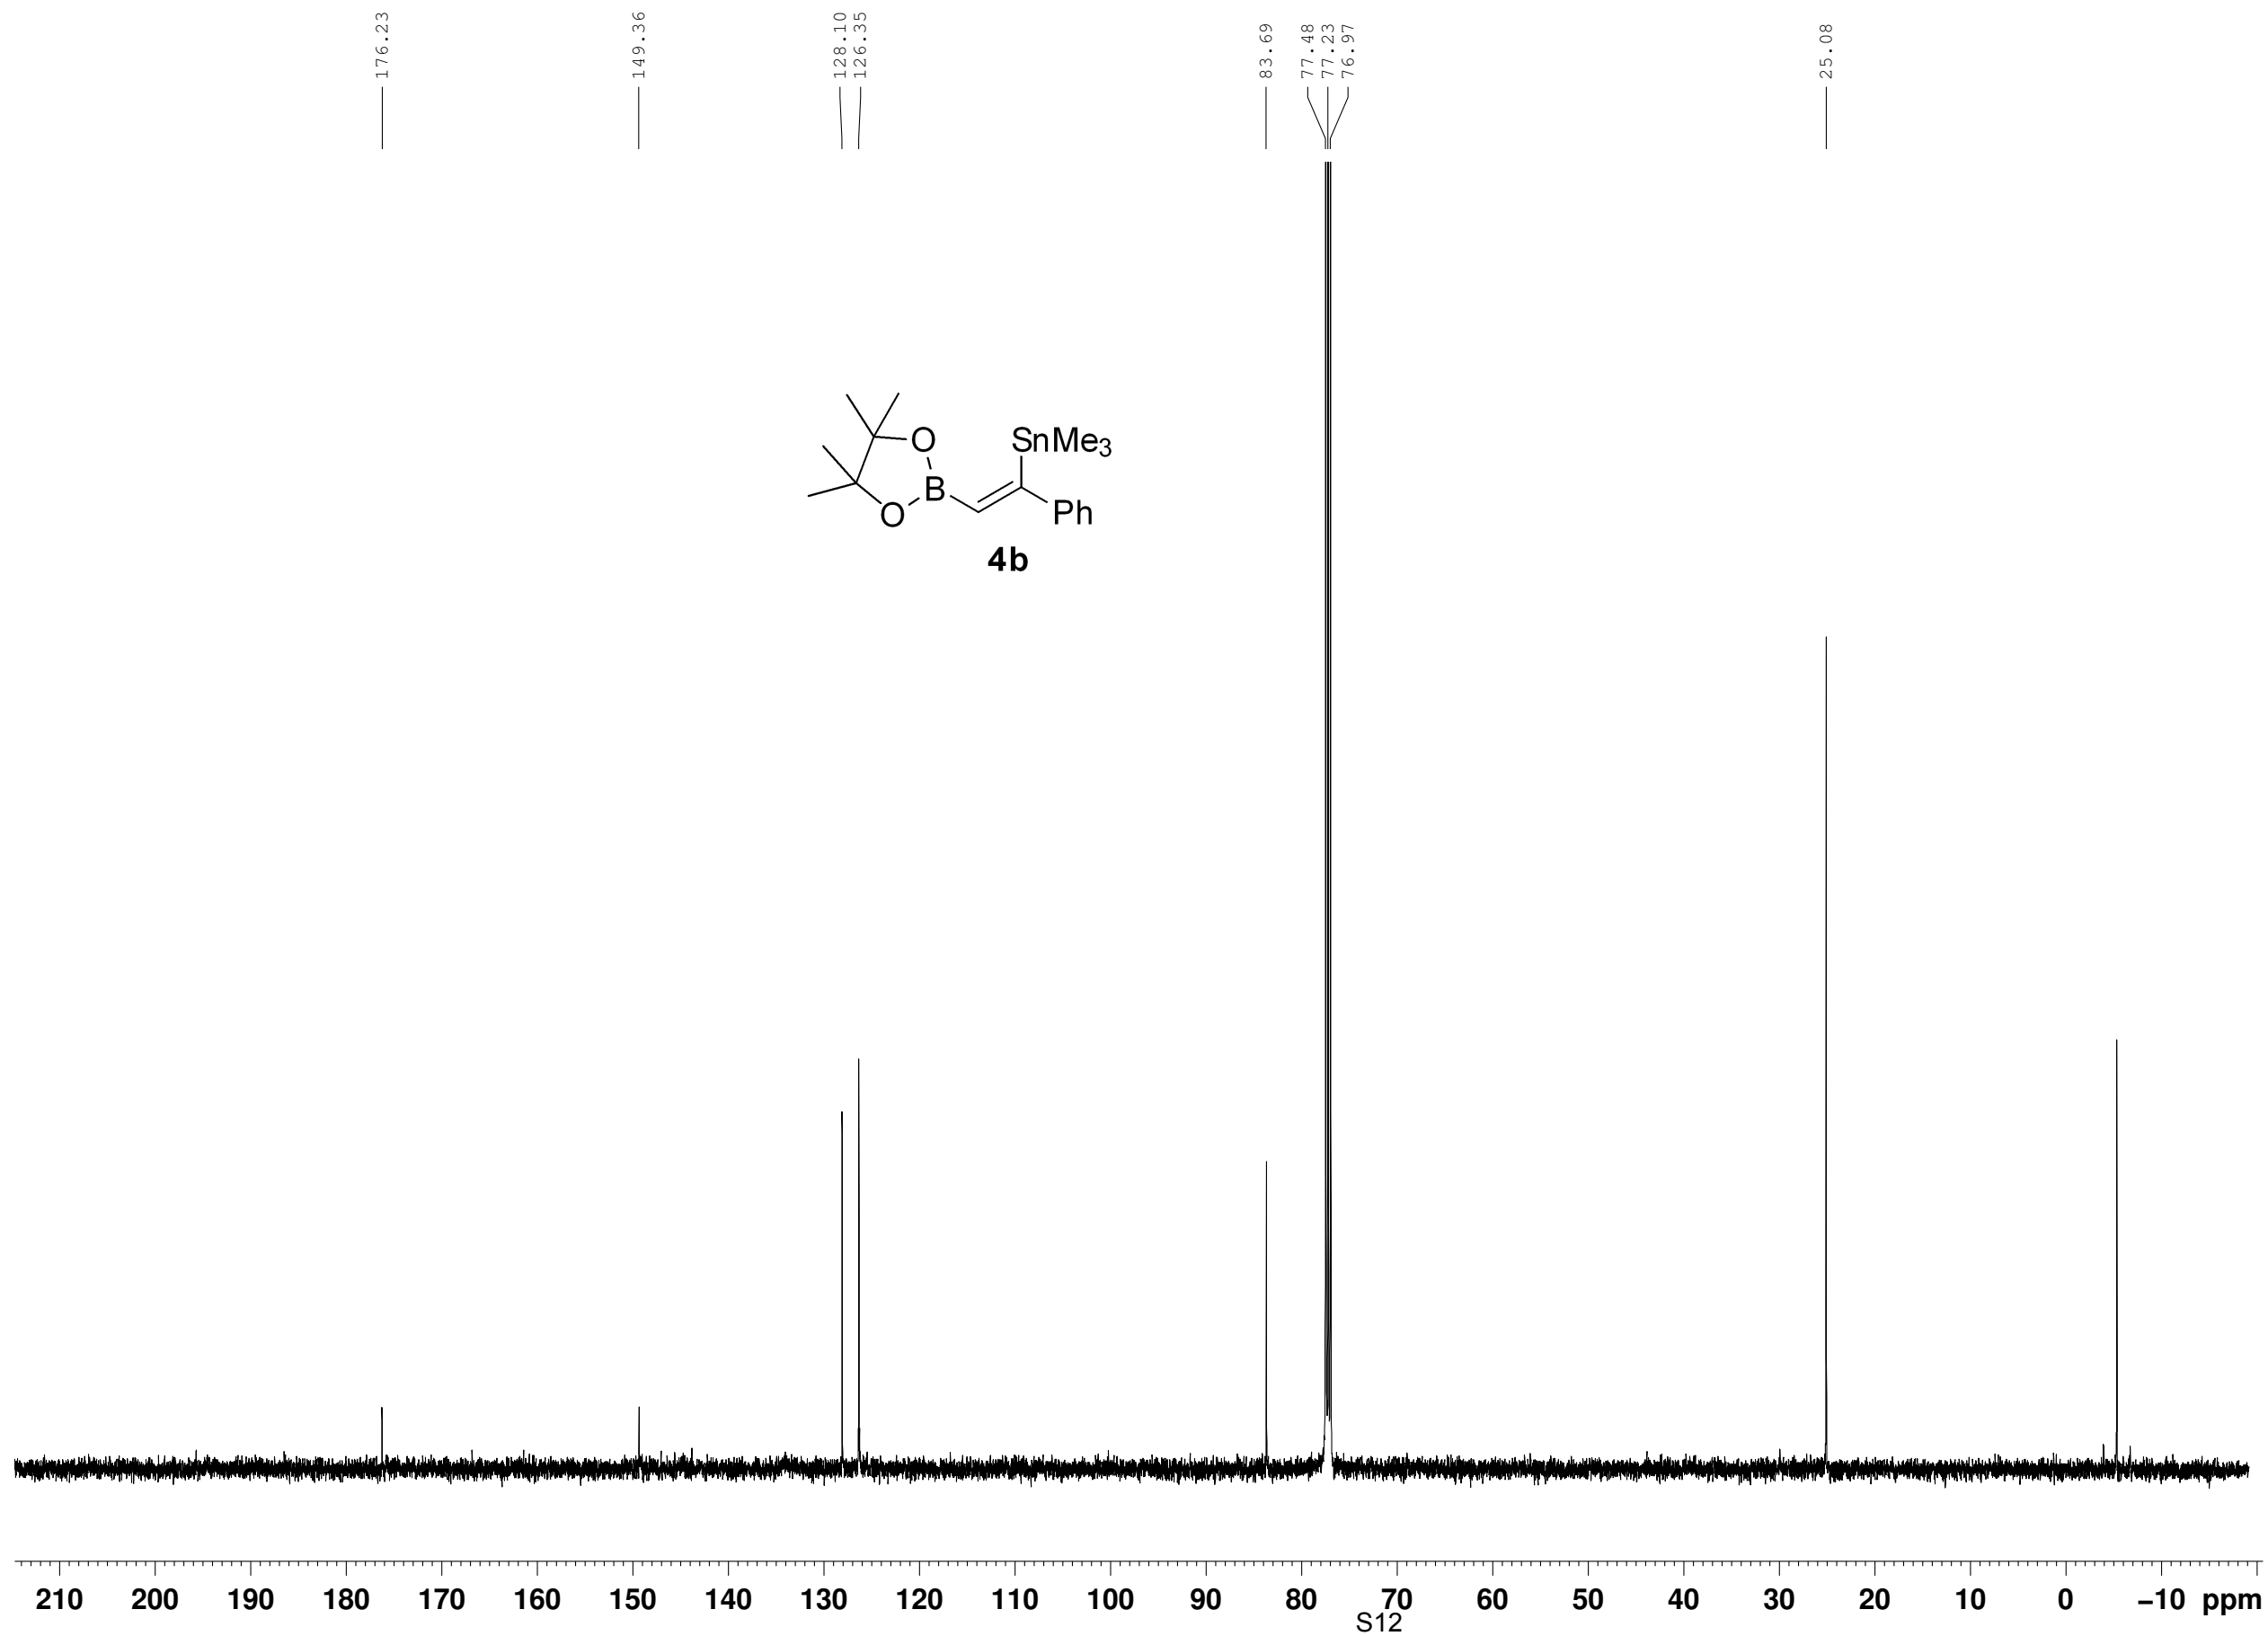

Current Data Parameters  
 NAME Rs-3-154  
 EXPNO 4  
 PROCNO 1

F2 - Acquisition Parameters  
 Date\_ 20090204  
 Time 7.32  
 INSTRUM spect  
 PROBHD 5 mm Multinucl  
 PULPROG zgpg30  
 TD 65536  
 SOLVENT CDC13  
 NS 1097  
 DS 4  
 SWH 30030.029 Hz  
 FIDRES 0.458222 Hz  
 AQ 1.0912244 sec  
 RG 6502  
 DW 16.650 usec  
 DE 12.00 usec  
 TE 300.2 K  
 D1 2.0000000 sec  
 d11 0.03000000 sec  
 DELTA 1.89999998 sec  
 MCREST 0.00000000 sec  
 MCWRK 0.01500000 sec

==== CHANNEL f1 =====  
 NUC1 13C  
 P1 12.00 usec  
 PL1 3.00 dB  
 SFO1 125.7427020 MHz

==== CHANNEL f2 =====  
 CPDPRG2 waltz16  
 NUC2 1H  
 PCPD2 100.00 usec  
 PL2 -1.00 dB  
 PL12 15.59 dB  
 PL13 22.50 dB  
 SFO2 500.0220001 MHz

F2 - Processing parameters  
 SI 32768  
 SF 125.7301023 MHz  
 WDW EM  
 SSB 0  
 LB 1.00 Hz  
 GB 0  
 PC 1.00

The Ohio State University  
Department of Chemistry  
NMR Facility  
400MHz - 0083

Current Data Parameters  
NAME Rs-3-155  
EXPNO 1  
PROCNO 1

F2 - Acquisition Parameters  
Date\_ 20090204  
Time 15.52  
INSTRUM spect  
PROBHD 5 mm QNP 1H/13  
PULPROG zg30  
TD 65536  
SOLVENT CDCl3  
NS 16  
DS 2  
SWH 8278.146 Hz  
FIDRES 0.126314 Hz  
AQ 3.9584243 sec  
RG 645.1  
DW 60.400 use  
DE 6.00 use  
TE 300.2 K  
D1 1.00000000 sec  
MCREST 0.00000000 sec  
MCWRK 0.01500000 sec

==== CHANNEL f1 =====  
NUC1 1H  
P1 13.00 use  
PL1 0.00 dB  
SFO1 400.1324710 MHz

F2 - Processing parameters  
SI 32768  
SF 400.1300174 MHz  
WDW EM  
SSB 0  
LB 0.30 Hz  
GB 0  
PC 1.00

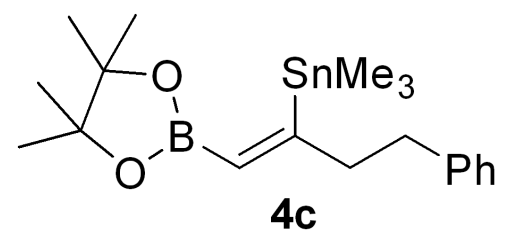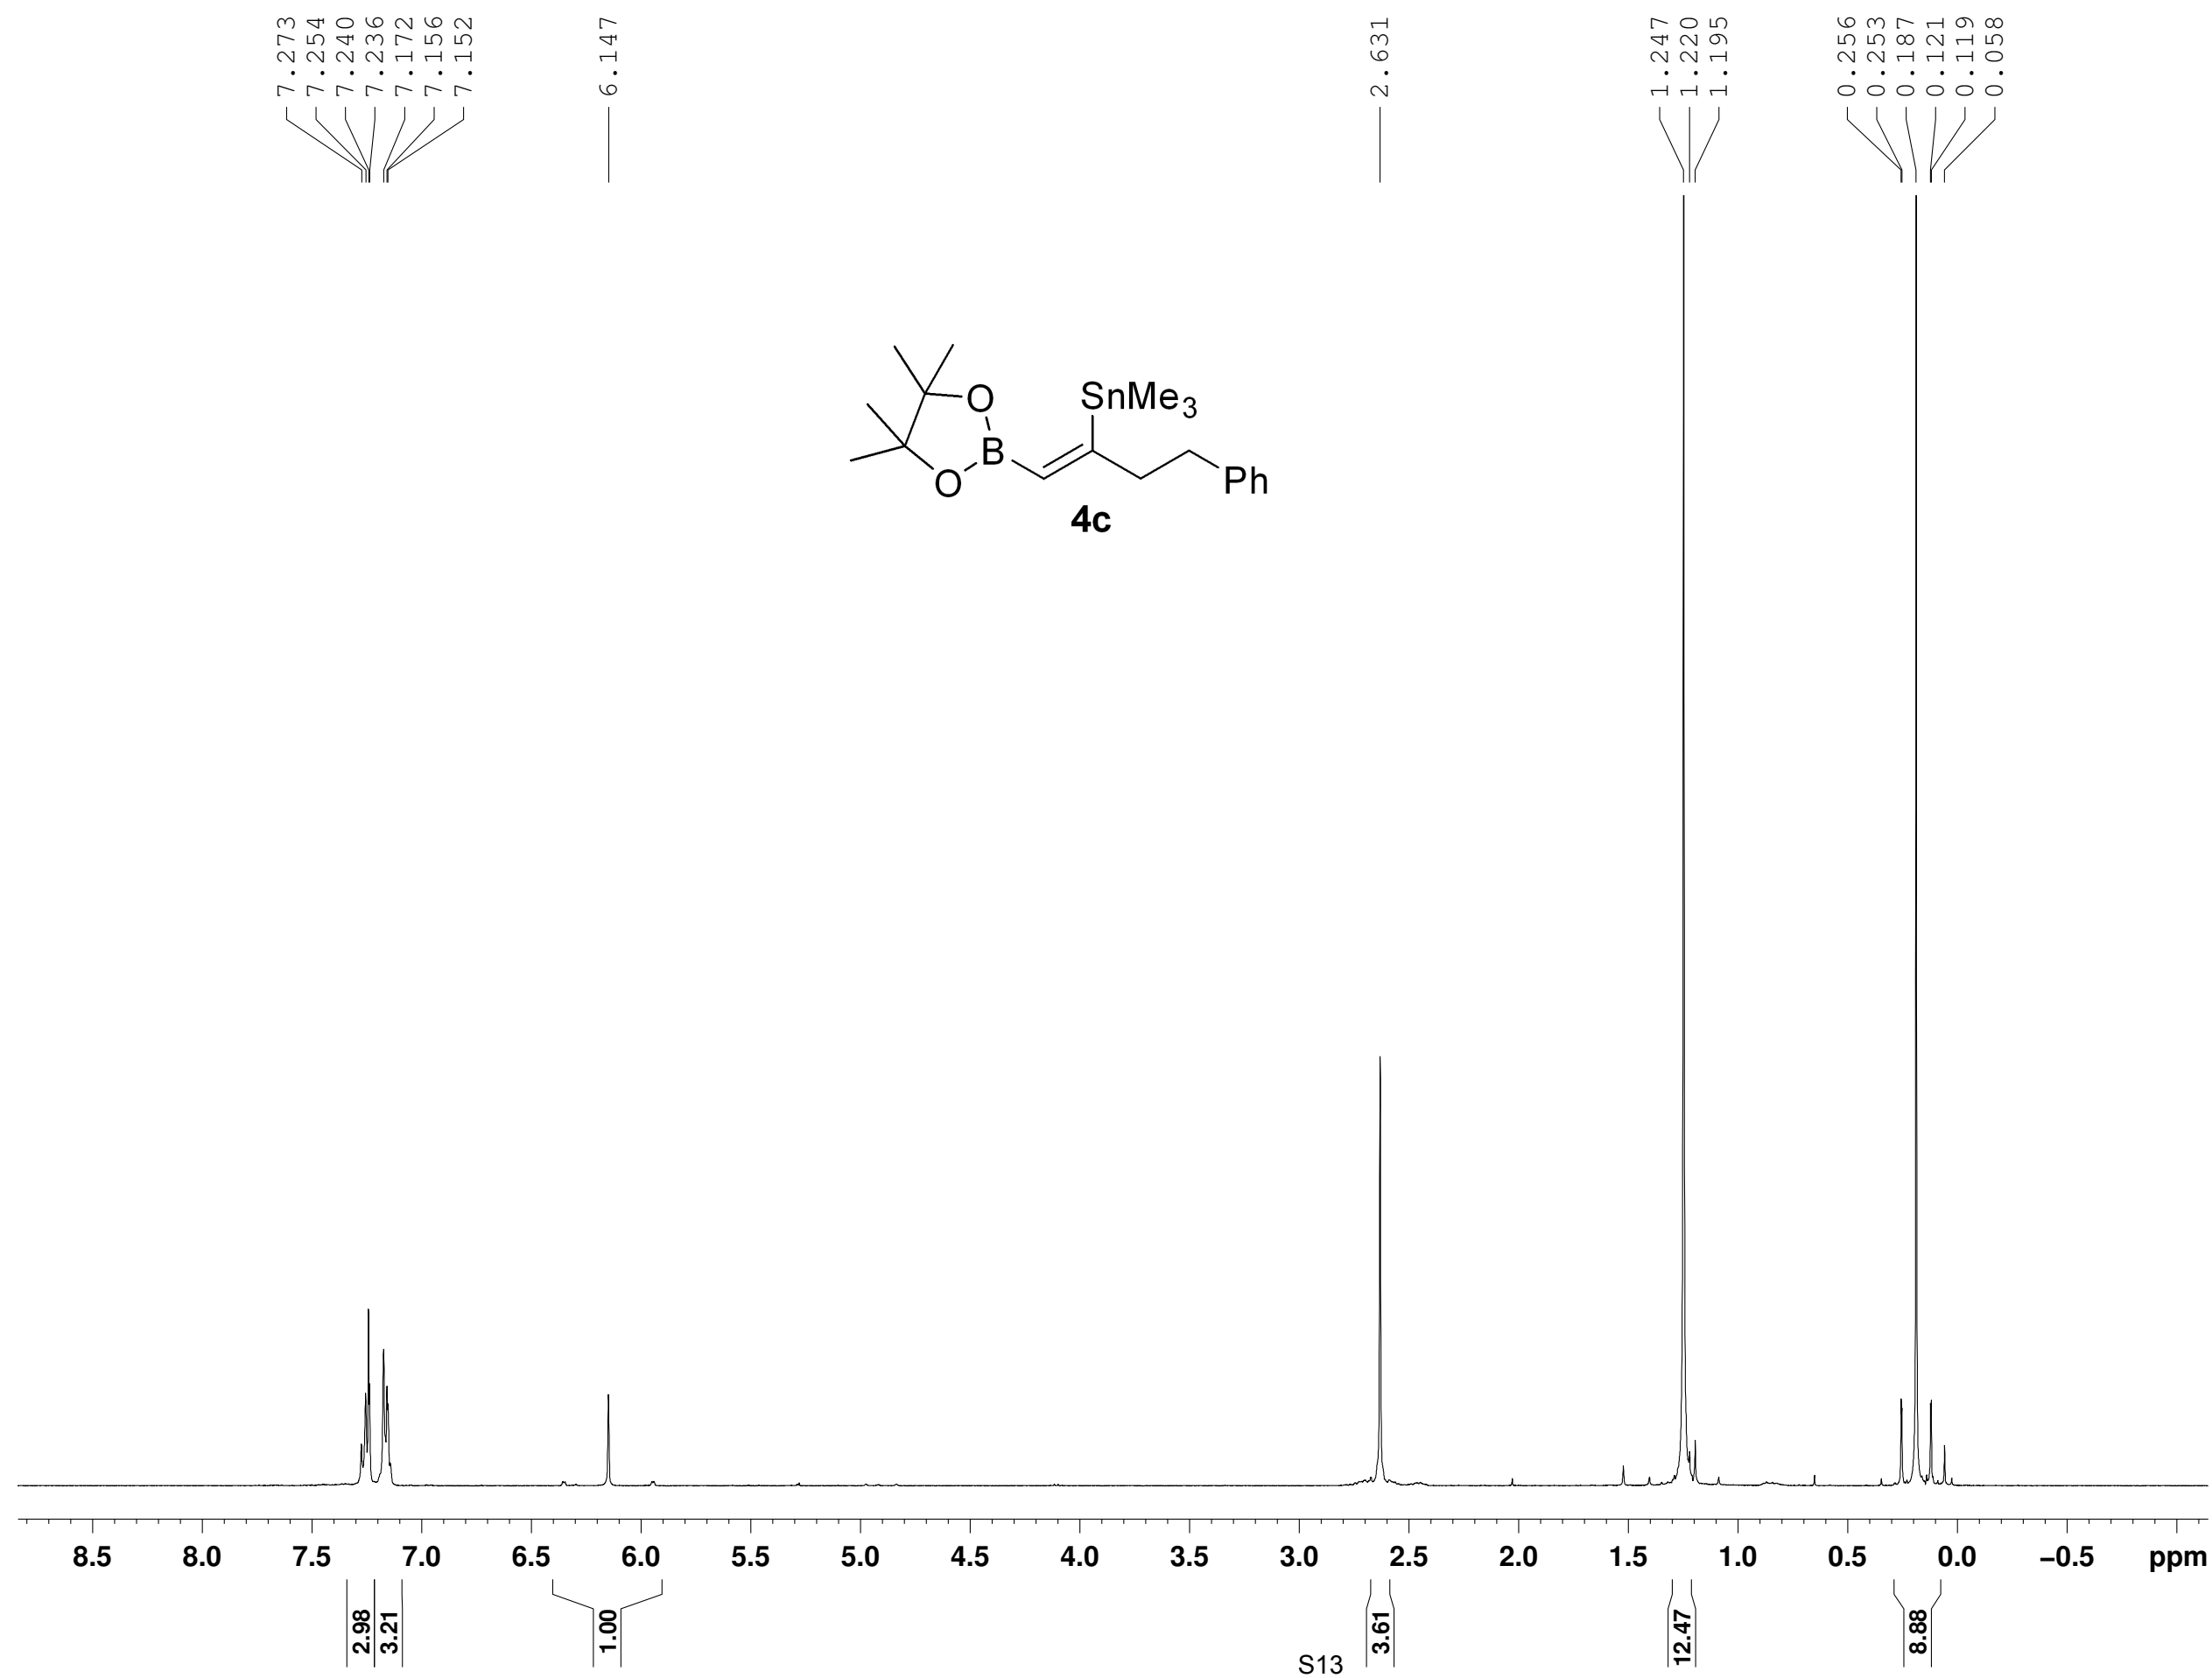

S13

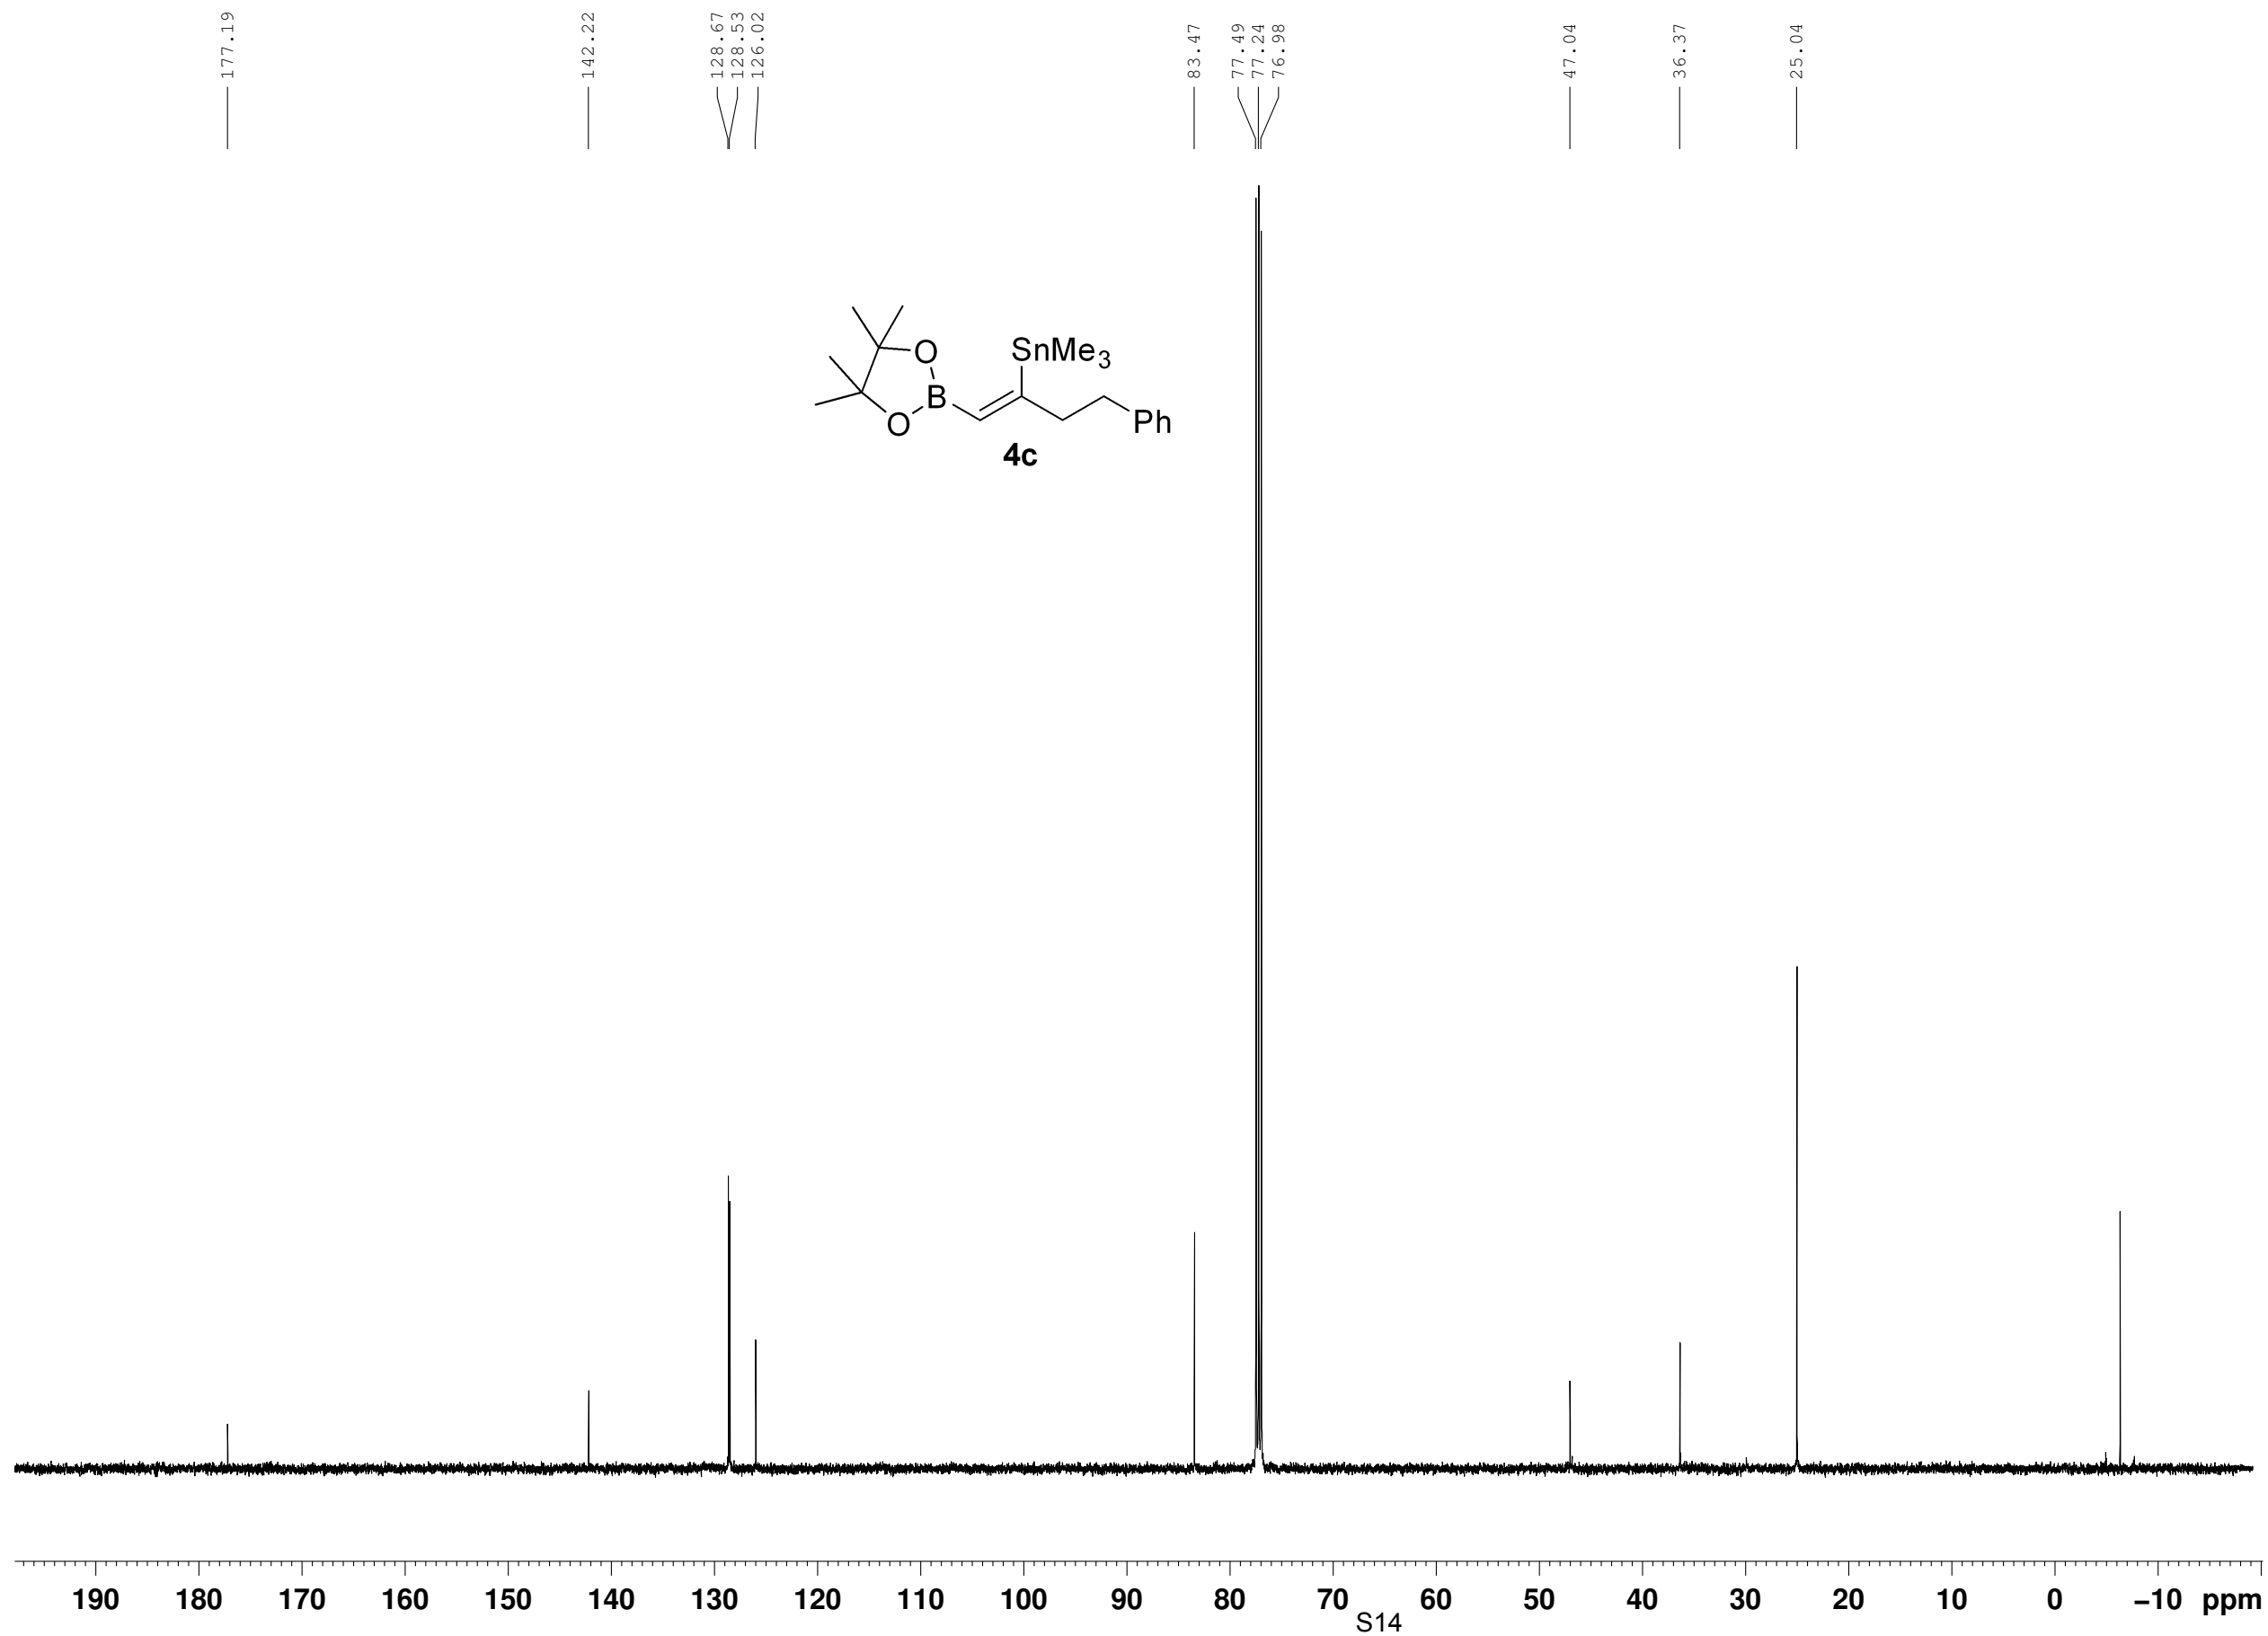

Current Data Parameters  
 NAME Rs-3-155  
 EXPNO 2  
 PROCNO 1

F2 - Acquisition Parameters  
 Date\_ 20090204  
 Time 16.11  
 INSTRUM spect  
 PROBHD 5 mm Multinucl  
 PULPROG zgpg30  
 TD 65536  
 SOLVENT CDC13  
 NS 860  
 DS 4  
 SWH 30030.029 Hz  
 FIDRES 0.458222 Hz  
 AQ 1.0912244 sec  
 RG 13004  
 DW 16.650 usec  
 DE 12.00 usec  
 TE 300.2 K  
 D1 2.0000000 sec  
 d11 0.03000000 sec  
 DELTA 1.89999998 sec  
 MCREST 0.00000000 sec  
 MCWRK 0.01500000 sec

==== CHANNEL f1 =====  
 NUC1 13C  
 P1 12.00 usec  
 PL1 3.00 dB  
 SFO1 125.7427020 MHz

==== CHANNEL f2 =====  
 CPDPRG2 waltz16  
 NUC2 1H  
 PCPD2 100.00 usec  
 PL2 -1.00 dB  
 PL12 15.59 dB  
 PL13 22.50 dB  
 SFO2 500.0220001 MHz

F2 - Processing parameters  
 SI 32768  
 SF 125.7301014 MHz  
 WDW EM  
 SSB 0  
 LB 1.00 Hz  
 GB 0  
 PC 1.40

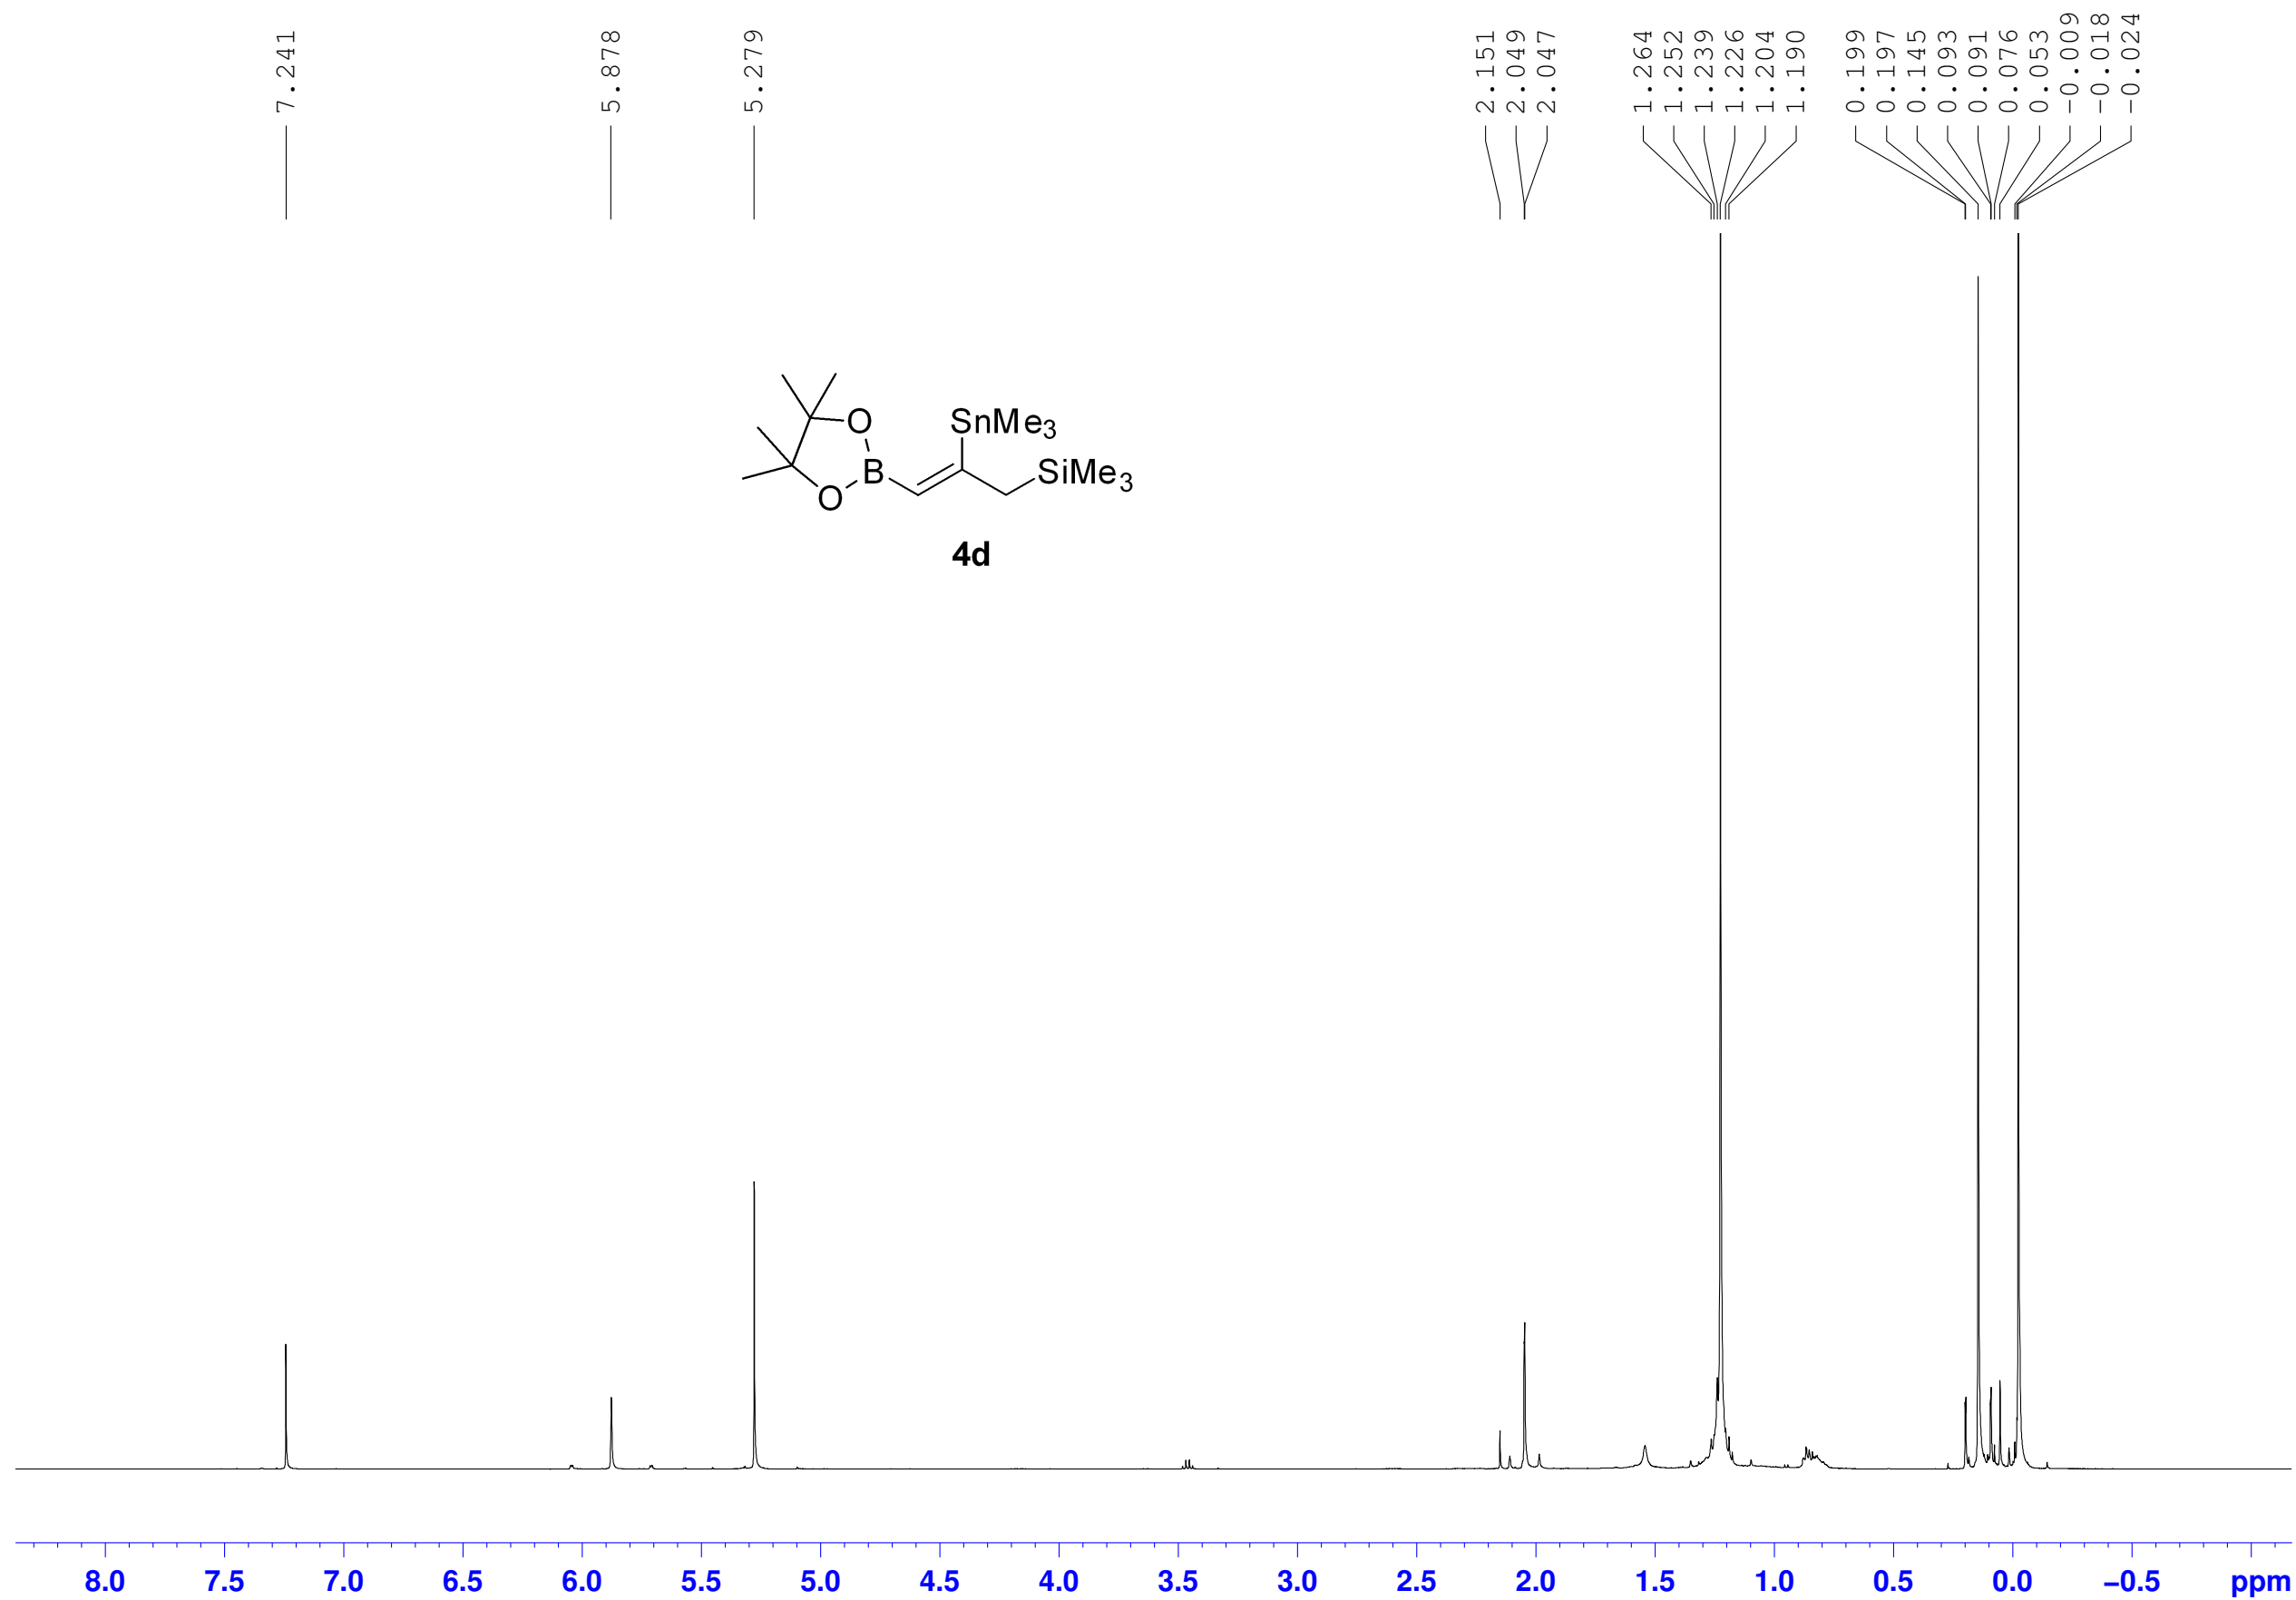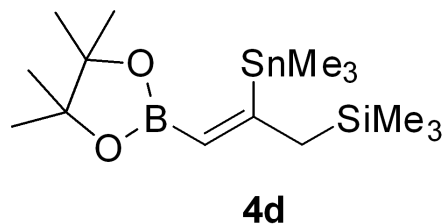

Current Data Parameters  
 NAME Rs-3-245C  
 EXPNO 2  
 PROCNO 1

F2 - Acquisition Parameters  
 Date\_ 20090418  
 Time 11.09  
 INSTRUM spect  
 PROBHD 5 mm Multinucl  
 PULPROG zg30  
 TD 65536  
 SOLVENT CDC13  
 NS 16  
 DS 2  
 SWH 10330.578 Hz  
 FIDRES 0.157632 Hz  
 AQ 3.1719923 sec  
 RG 256  
 DW 48.400 usec  
 DE 6.00 usec  
 TE 300.2 K  
 D1 1.00000000 sec  
 MCREST 0.00000000 sec  
 MCWRK 0.01500000 sec

==== CHANNEL f1 =====  
 NUC1 1H  
 P1 14.80 usec  
 PL1 -1.00 dB  
 SFO1 500.0230878 MHz

F2 - Processing parameters  
 SI 32768  
 SF 500.0200213 MHz  
 WDW EM  
 SSB 0  
 LB 0.30 Hz  
 GB 0  
 PC 1.00

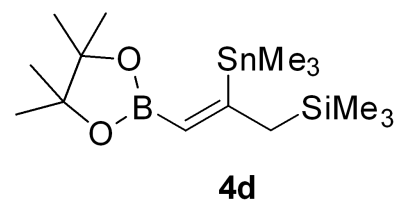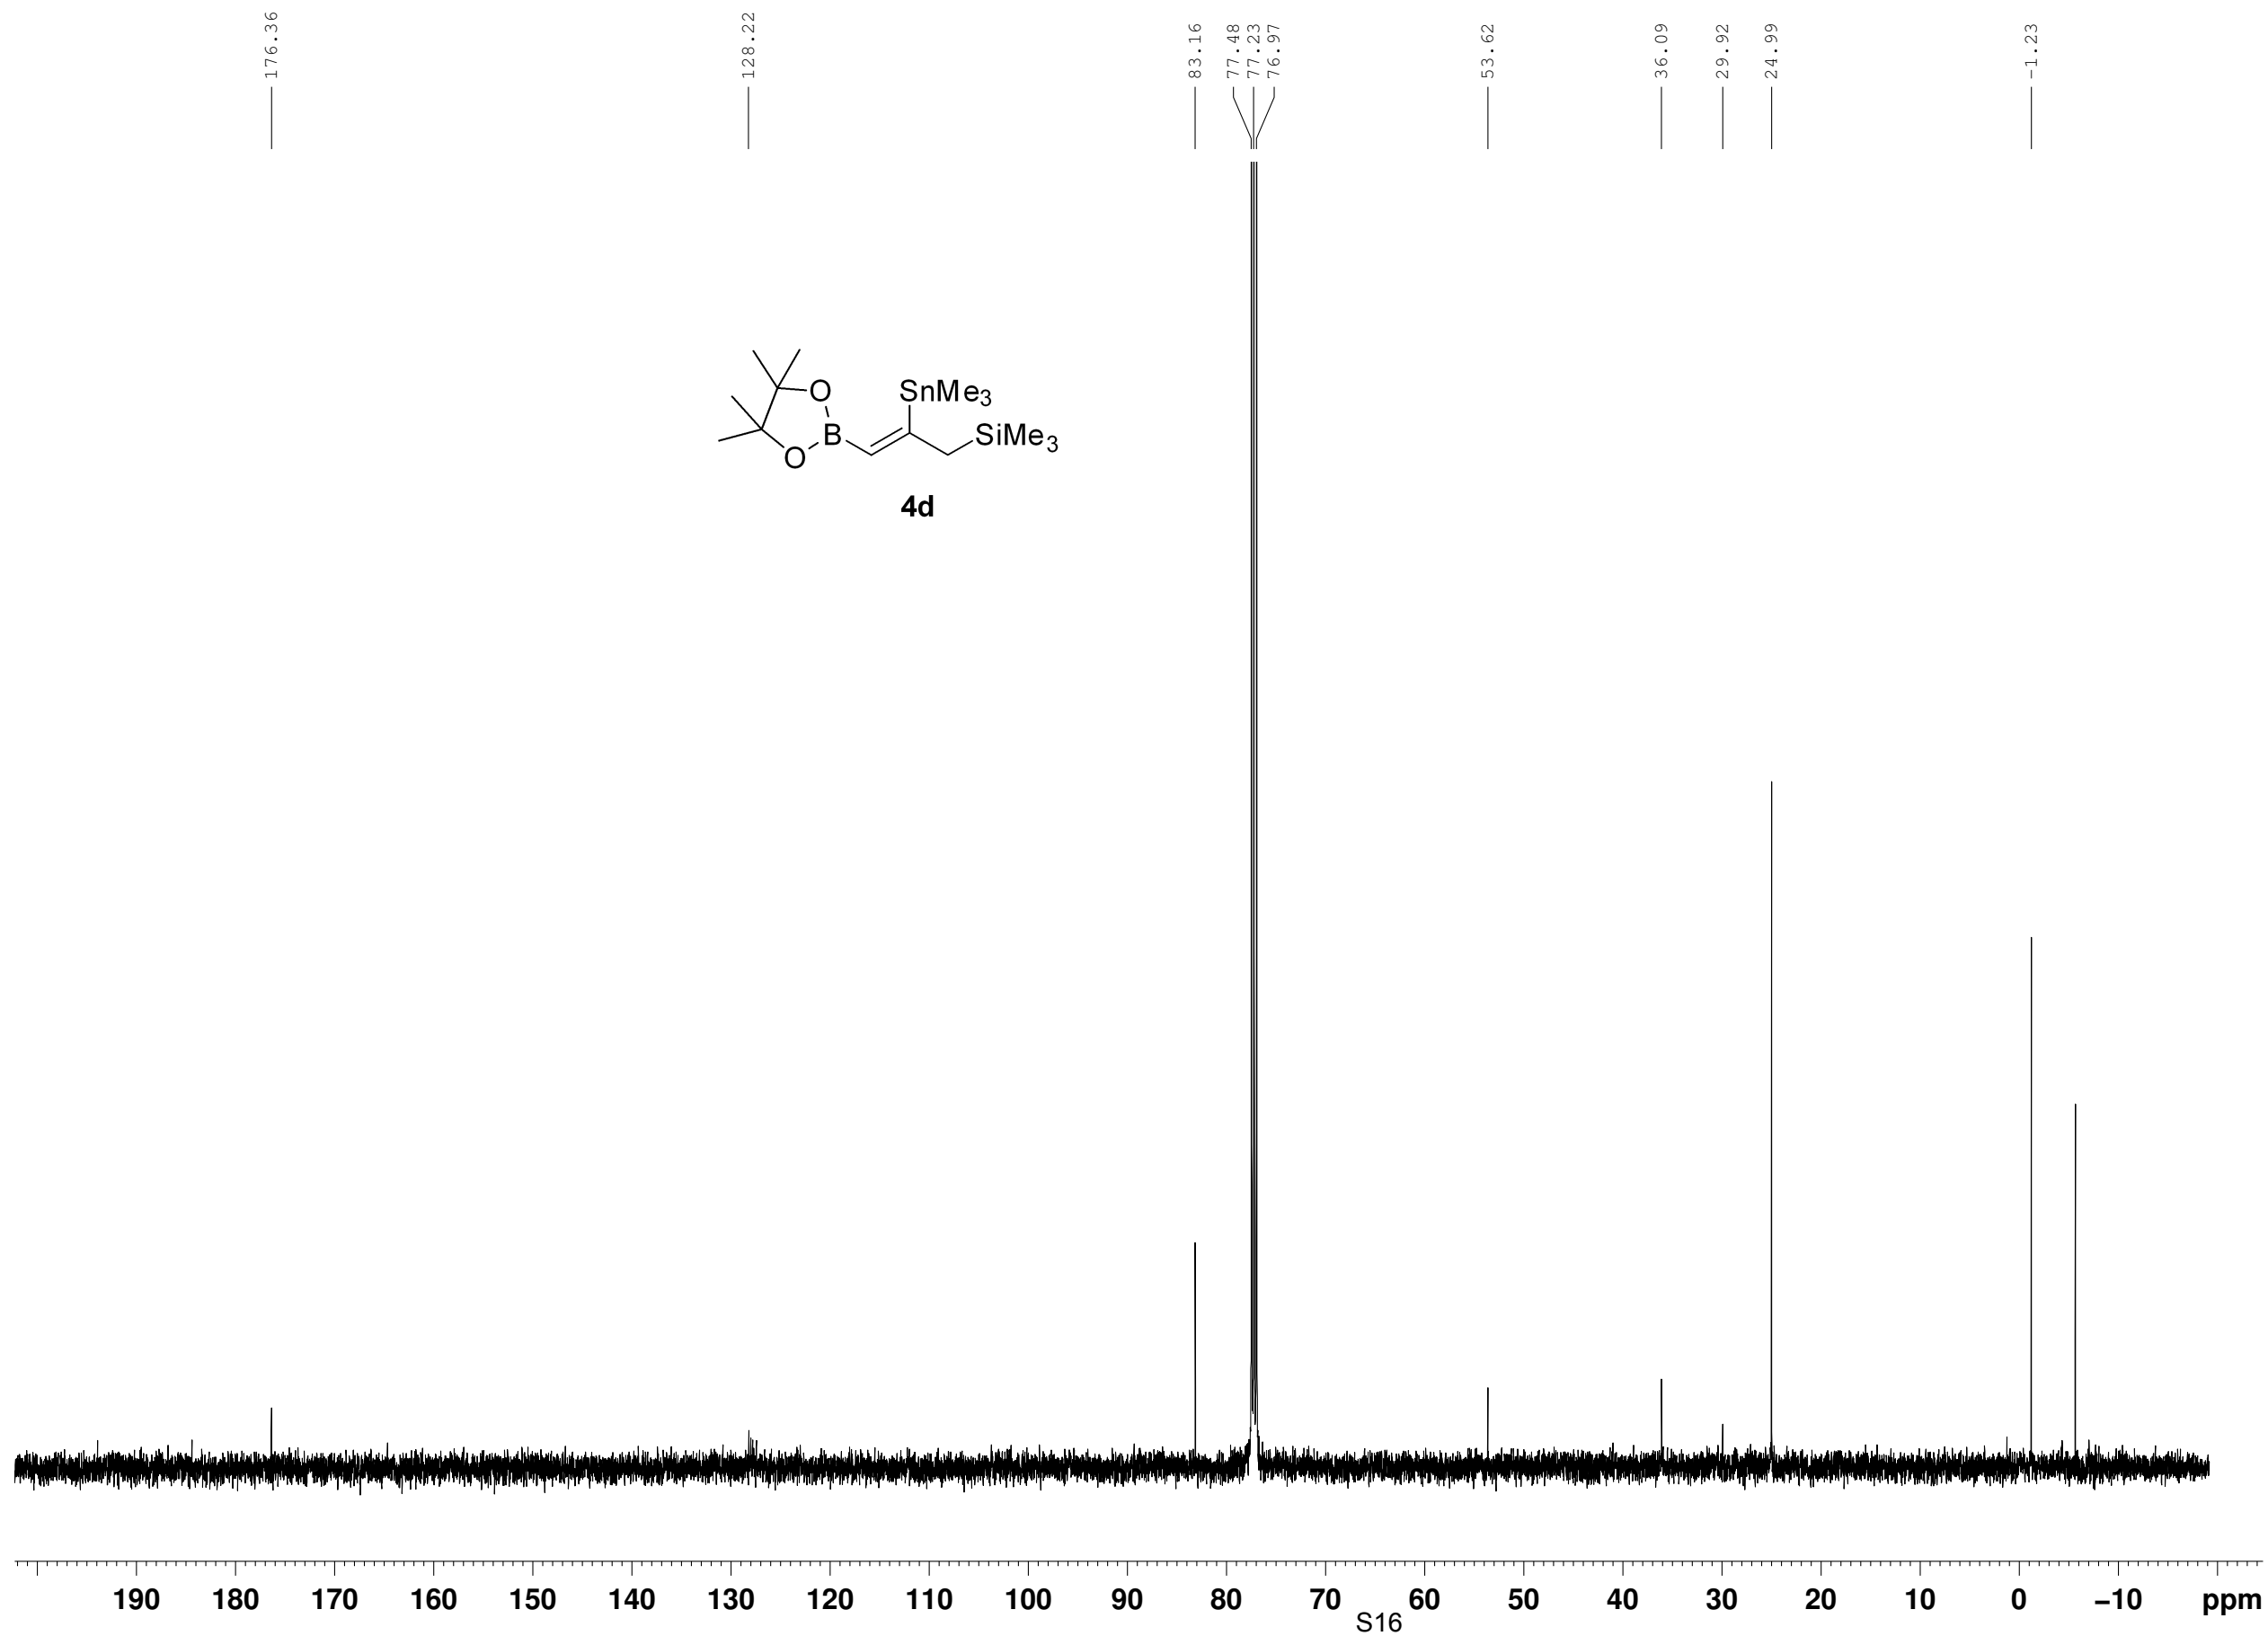

Current Data Parameters  
 NAME Rs-3-245C  
 EXPNO 3  
 PROCNO 1

F2 - Acquisition Parameters  
 Date\_ 20090418  
 Time 11.16  
 INSTRUM spect  
 PROBHD 5 mm Multinucl  
 PULPROG zgpg30  
 TD 65536  
 SOLVENT CDC13  
 NS 614  
 DS 4  
 SWH 30030.029 Hz  
 FIDRES 0.458222 Hz  
 AQ 1.0912244 sec  
 RG 3649.1  
 DW 16.650 usec  
 DE 12.00 usec  
 TE 300.2 K  
 D1 2.0000000 sec  
 d11 0.03000000 sec  
 DELTA 1.89999998 sec  
 MCREST 0.00000000 sec  
 MCWRK 0.01500000 sec

==== CHANNEL f1 =====  
 NUC1 13C  
 P1 12.00 usec  
 PL1 3.00 dB  
 SFO1 125.7427020 MHz

==== CHANNEL f2 =====  
 CPDPRG2 waltz16  
 NUC2 1H  
 PCPD2 100.00 usec  
 PL2 -1.00 dB  
 PL12 15.59 dB  
 PL13 22.50 dB  
 SFO2 500.0220001 MHz

F2 - Processing parameters  
 SI 32768  
 SF 125.7301014 MHz  
 WDW EM  
 SSB 0  
 LB 1.00 Hz  
 GB 0  
 PC 1.40



The Ohio State University  
Department of Chemistry  
NMR Facility  
400MHz - 0083

Current Data Parameters  
NAME Rs-3-250  
EXPNO 1  
PROCNO 1

F2 - Acquisition Parameters  
Date\_ 20090420  
Time 11.05  
INSTRUM spect  
PROBHD 5 mm QNP 1H/13  
PULPROG zg30  
TD 65536  
SOLVENT CDCl3  
NS 16  
DS 2  
SWH 8278.146 Hz  
FIDRES 0.126314 Hz  
AQ 3.9584243 sec  
RG 128  
DW 60.400 use  
DE 6.00 use  
TE 299.2 K  
D1 1.00000000 sec  
MCREST 0.00000000 sec  
MCWRK 0.01500000 sec

==== CHANNEL f1 =====  
NUC1 1H  
P1 13.00 use  
PL1 0.00 dB  
SFO1 400.1324710 MHz

F2 - Processing parameters  
SI 32768  
SF 400.1300174 MHz  
WDW EM  
SSB 0  
LB 0.30 Hz  
GB 0  
PC 1.00

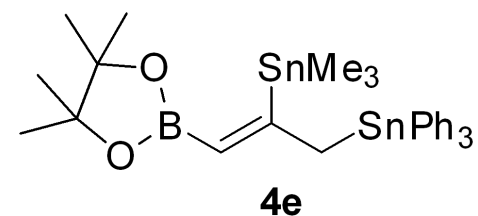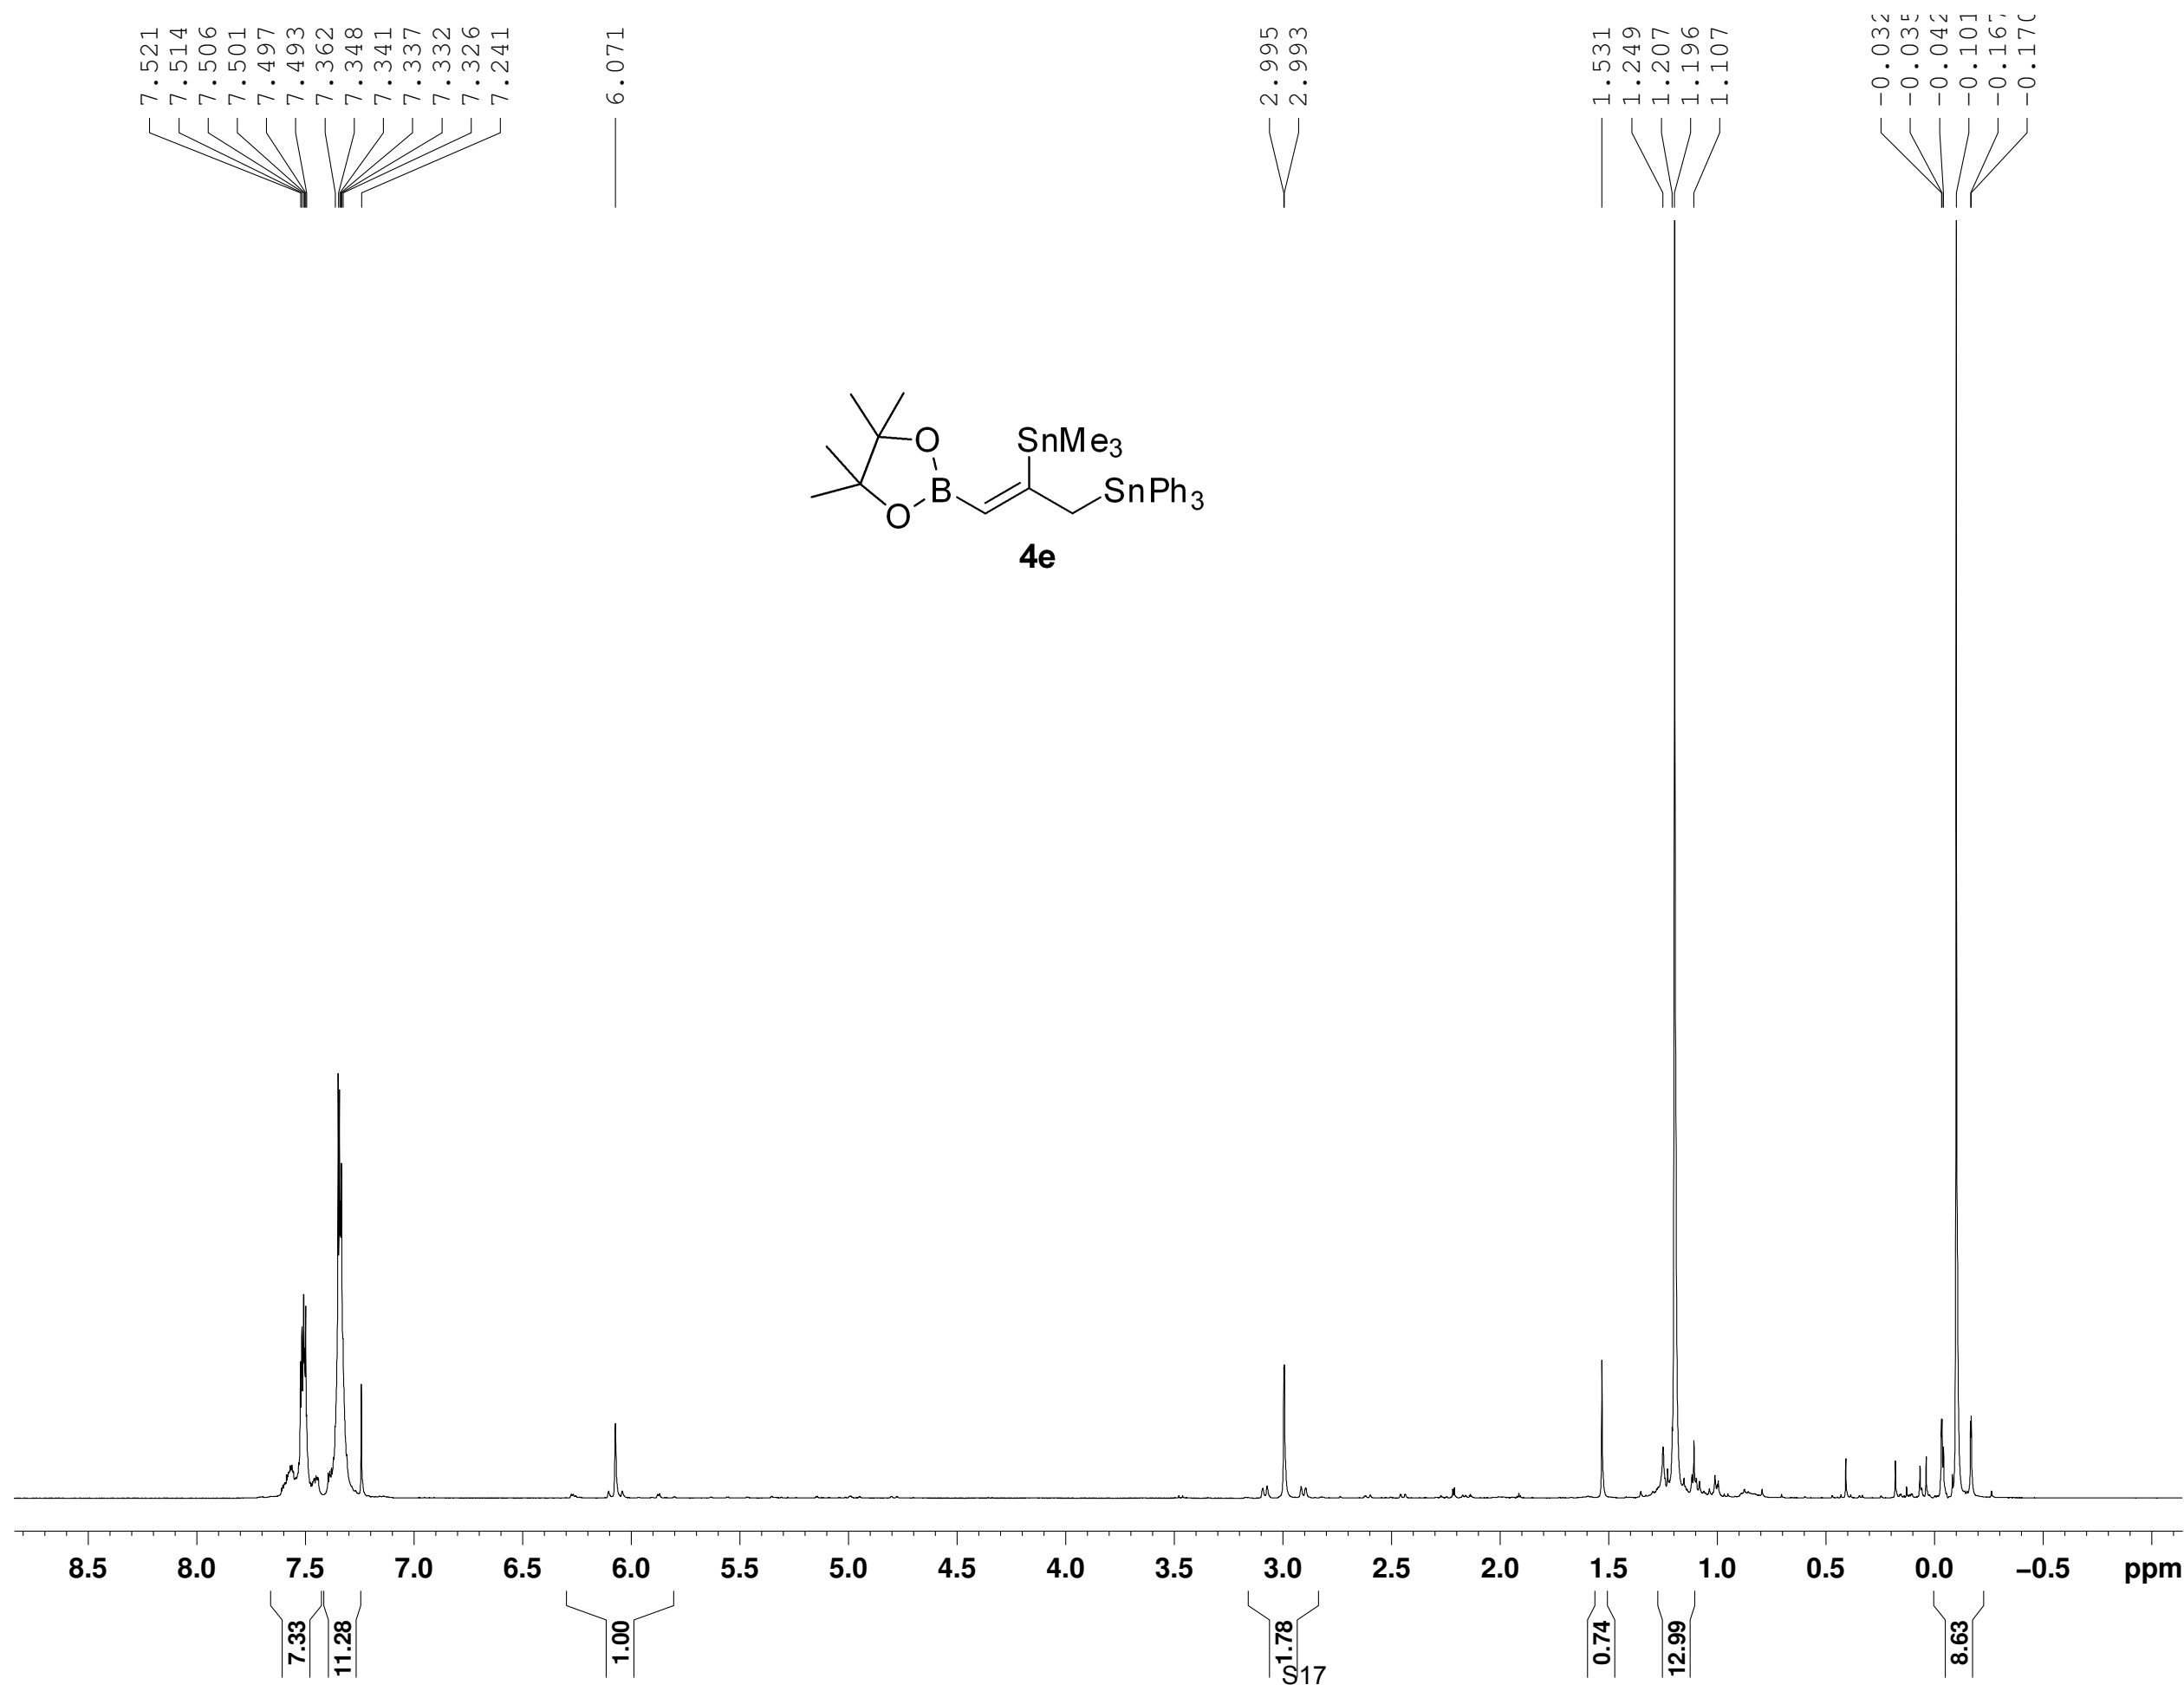

176.61

138.59  
137.67  
137.49  
137.32  
137.17  
129.18  
128.93  
128.68  
128.43

83.13  
77.55  
77.33  
76.92

30.51  
24.90

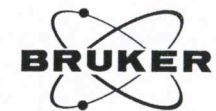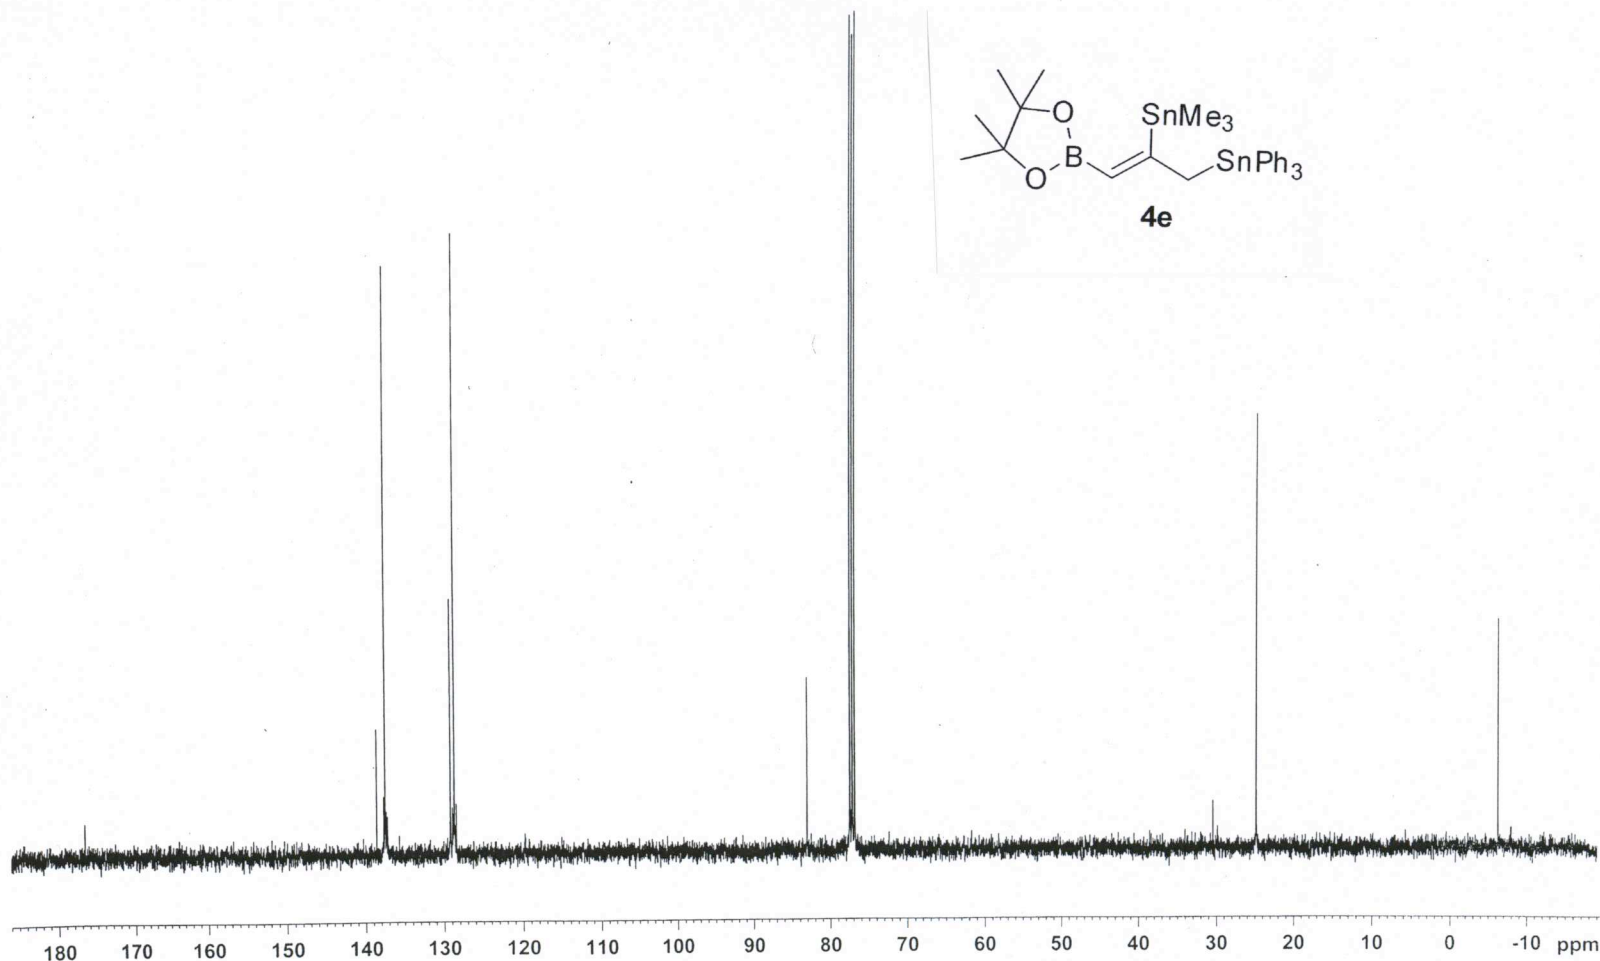

Current Data Parameters  
NAME Rs-3-250  
EXPNO 2  
PROCNO 1

F2 - Acquisition Parameters  
Date\_ 20090420  
Time 11.10  
INSTRUM spect  
PROBHD 5 mm QNP 1H/13  
PULPROG zgpg30  
TD 65536  
SOLVENT CDCl3  
NS 211  
DS 4  
SWH 23980.814 Hz  
FIDRES 0.365918 Hz  
AQ 1.3664756 sec  
RG 7298.2  
DW 20.850 usec  
DE 6.00 usec  
TE 299.2 K  
D1 2.00000000 sec  
d11 0.03000000 sec  
DELTA 1.89999998 sec  
MCREST 0.00000000 sec  
MCWRK 0.01500000 sec

===== CHANNEL f1 =====  
NUC1 \* 13C  
P1 10.50 usec  
PL1 0.00 dB  
SFO1 100.6228298 MHz

===== CHANNEL f2 =====  
CPDPRG2 waltz16  
NUC2 1H  
PCPD2 80.00 usec  
PL2 -6.00 dB  
PL12 14.56 dB  
PL13 16.50 dB  
SFO2 400.1316005 MHz

F2 - Processing parameters  
SI 32768  
SF 100.6127483 MHz  
WDW EM  
SSB 0  
LB 1.00 Hz  
GB 0  
PC 1.00

7.241  
7.053  
7.049  
7.034  
7.014  
6.995  
6.963  
6.960  
6.956  
6.947  
6.941  
6.935  
6.923  
6.910  
6.907  
6.904  
6.890  
6.887  
6.870  
6.640  
6.637  
6.632  
6.628  
6.620  
6.617  
5.276

3.492  
3.474  
3.457  
3.439

2.029  
1.493  
1.284  
1.263  
1.245  
1.233  
1.213  
1.195  
1.178  
0.872  
0.150  
0.147  
0.081  
0.068  
0.058  
0.049  
0.016  
0.013

The Ohio State University  
Department of Chemistry  
NMR Facility  
400MHz - 0083

Current Data Parameters  
NAME Rs-3-158  
EXPNO 1  
PROCNO 1

F2 - Acquisition Parameters  
Date\_ 20090204  
Time 21.18  
INSTRUM spect  
PROBHD 5 mm QNP 1H/13  
PULPROG zg30  
TD 65536  
SOLVENT CDCl3  
NS 16  
DS 2  
SWH 8278.146 Hz  
FIDRES 0.126314 Hz  
AQ 3.9584243 sec  
RG 724.1  
DW 60.400 use  
DE 6.00 use  
TE 300.2 K  
D1 1.00000000 sec  
MCREST 0.00000000 sec  
MCWRK 0.01500000 sec

==== CHANNEL f1 =====  
NUC1 1H  
P1 13.00 use  
PL1 0.00 dB  
SFO1 400.1324710 MHz

F2 - Processing parameters  
SI 32768  
SF 400.1300171 MHz  
WDW EM  
SSB 0  
LB 0.30 Hz  
GB 0  
PC 1.00

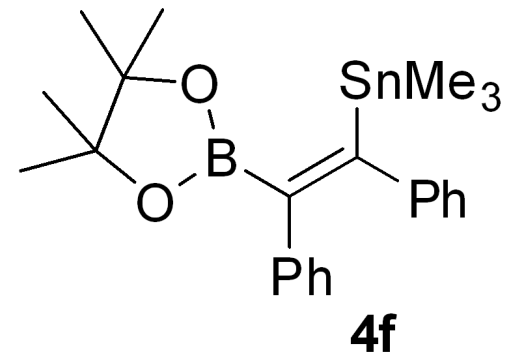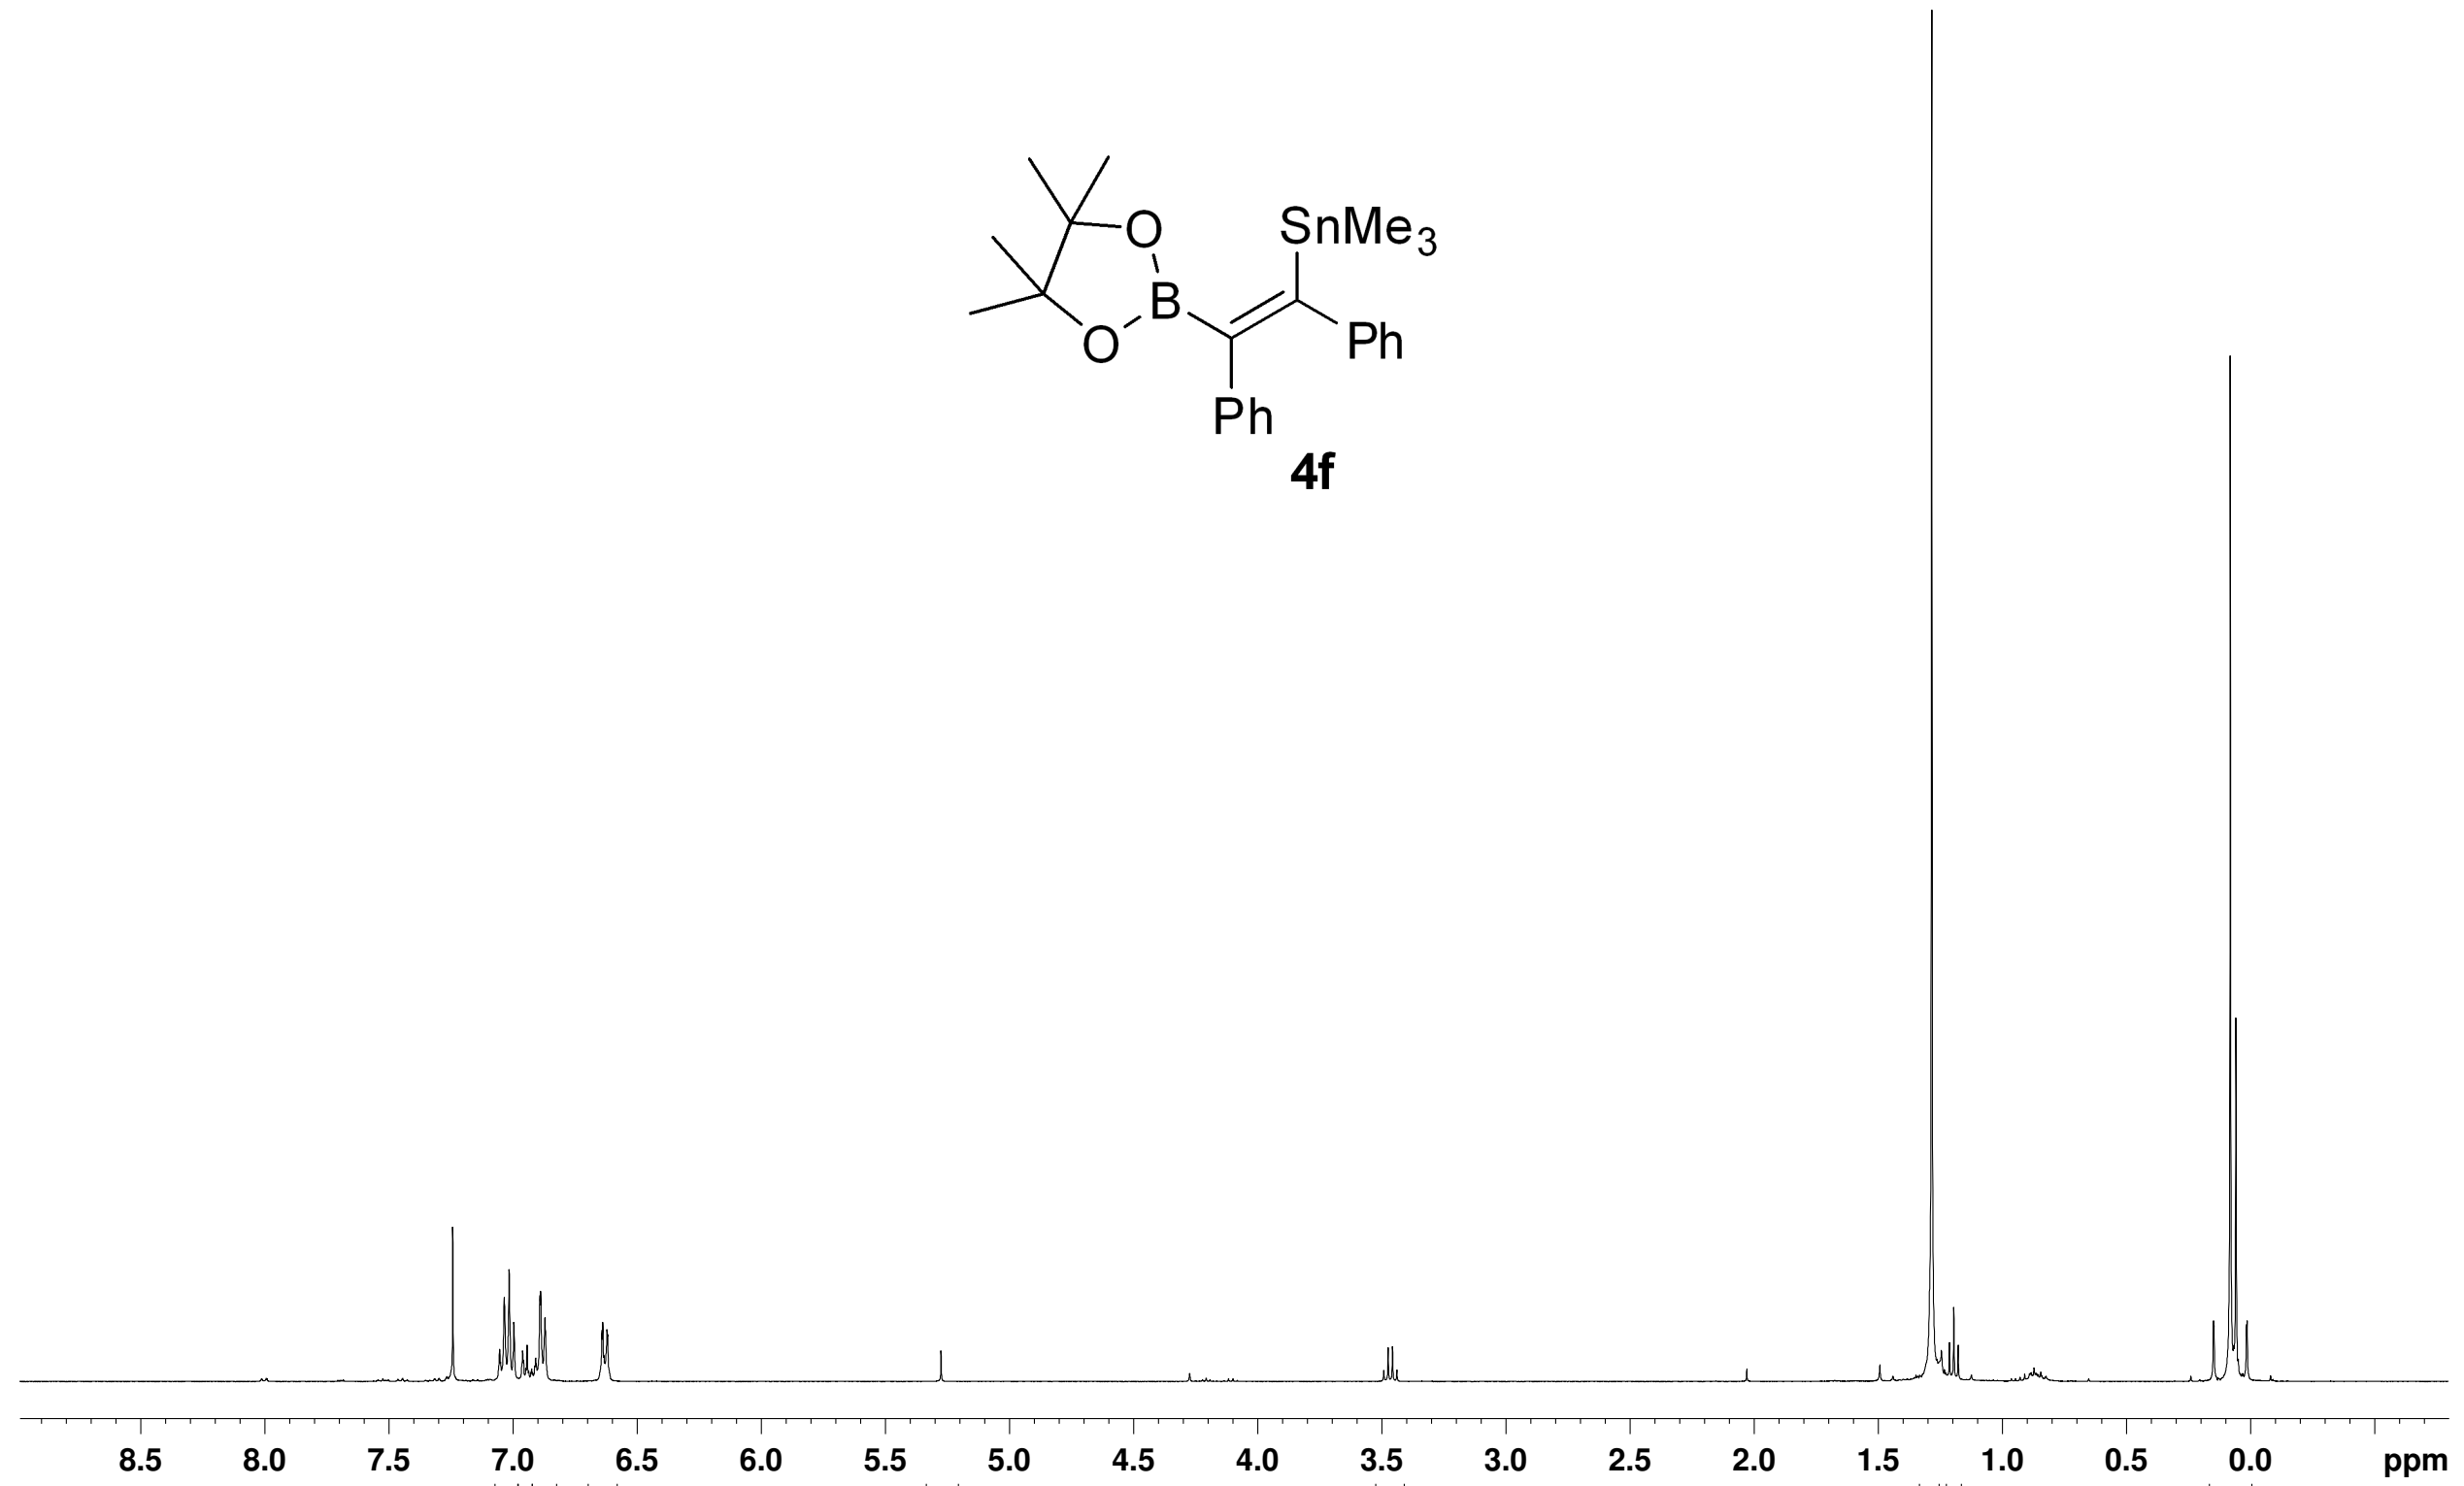

The Ohio State University  
Department of Chemistry  
NMR Facility  
400MHz - 0083

Current Data Parameters  
NAME Rs-3-158  
EXPNO 2  
PROCNO 1

F2 - Acquisition Parameters  
Date\_ 20090204  
Time 21.27  
INSTRUM spect  
PROBHD 5 mm QNP 1H/13  
PULPROG zgpg30  
TD 65536  
SOLVENT CDCl3  
NS 1412  
DS 4  
SWH 23980.814 Hz  
FIDRES 0.365918 Hz  
AQ 1.3664756 sec  
RG 18390.4  
DW 20.850 use  
DE 6.00 use  
TE 300.2 K  
D1 2.00000000 sec  
d11 0.03000000 sec  
DELTA 1.89999998 sec  
MCREST 0.00000000 sec  
MCWRK 0.01500000 sec

==== CHANNEL f1 =====  
NUC1 13C  
P1 10.50 use  
PL1 0.00 dB  
SFO1 100.6228298 MHz

==== CHANNEL f2 =====  
CPDPRG2 waltz16  
NUC2 1H  
PCPD2 80.00 use  
PL2 -6.00 dB  
PL12 14.56 dB  
PL13 16.50 dB  
SFO2 400.1316005 MHz

F2 - Processing parameters  
SI 32768  
SF 100.6127469 MHz  
WDW EM  
SSB 0  
LB 1.00 Hz  
GB 0  
PC 1.40

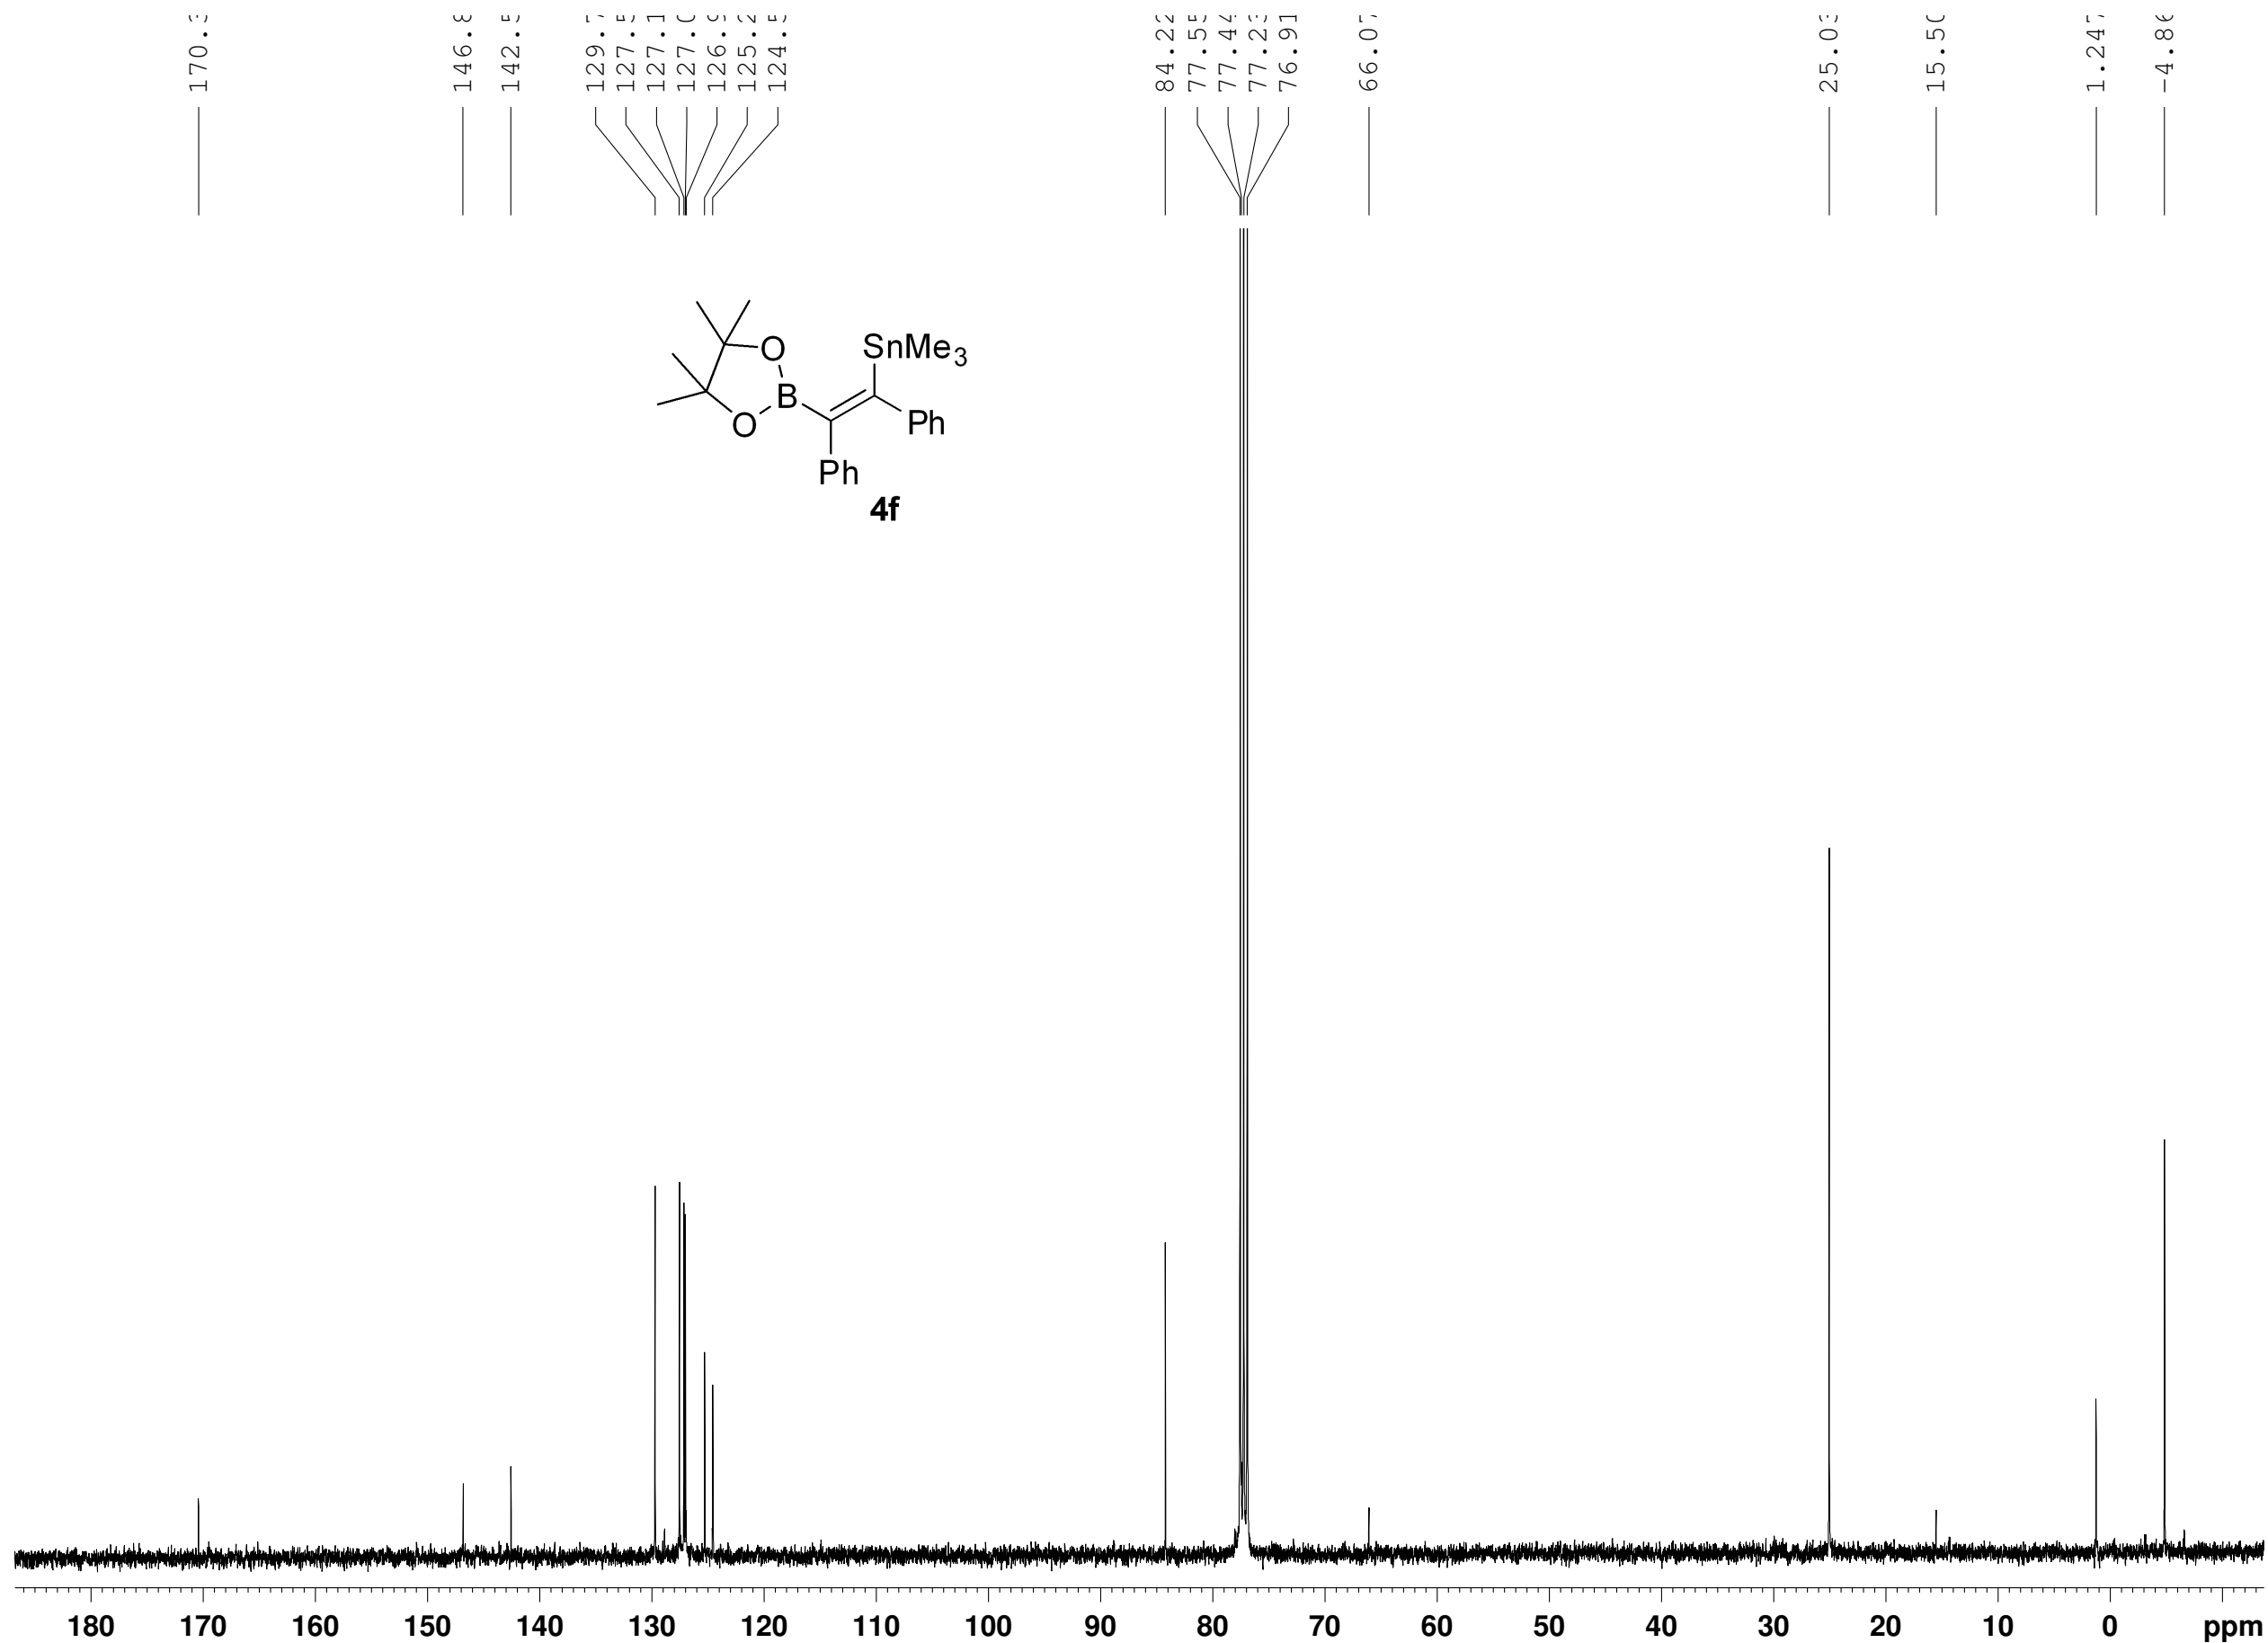

7.277  
7.269  
7.262  
7.254  
7.239  
7.082  
7.067  
7.052  
6.787  
6.784  
6.770

2.150  
1.974  
1.971  
1.889  
1.654  
1.644  
1.633  
1.513  
1.296  
1.288  
1.251  
1.241  
1.212  
0.647  
0.188  
0.054  
0.032  
0.030  
-0.022  
-0.075  
-0.077

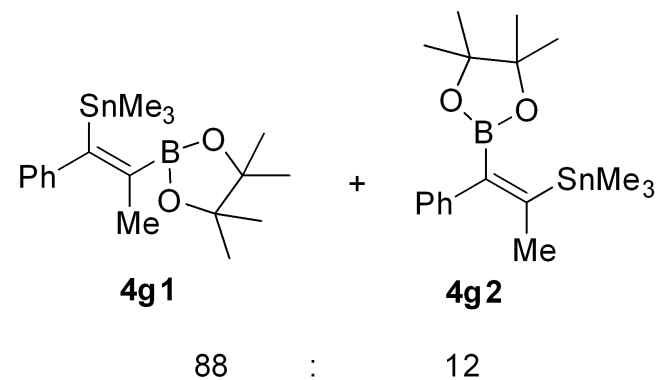

Current Data Parameters  
NAME Rs-3-162  
EXPNO 1  
PROCNO 1

F2 - Acquisition Parameters  
Date\_ 20090205  
Time 14.11  
INSTRUM spect  
PROBHD 5 mm Multinucl  
PULPROG zg30  
TD 65536  
SOLVENT CDCl3  
NS 16  
DS 2  
SWH 10330.578 Hz  
FIDRES 0.157632 Hz  
AQ 3.1719923 sec  
RG 287.4  
DW 48.400 usec  
DE 6.00 usec  
TE 300.2 K  
D1 1.00000000 sec  
MCREST 0.00000000 sec  
MCWRK 0.01500000 sec

==== CHANNEL f1 =====  
NUC1 1H  
P1 14.80 usec  
PL1 -1.00 dB  
SFO1 500.0230878 MHz

F2 - Processing parameters  
SI 32768  
SF 500.0200222 MHz  
WDW EM  
SSB 0  
LB 0.30 Hz  
GB 0  
PC 1.00

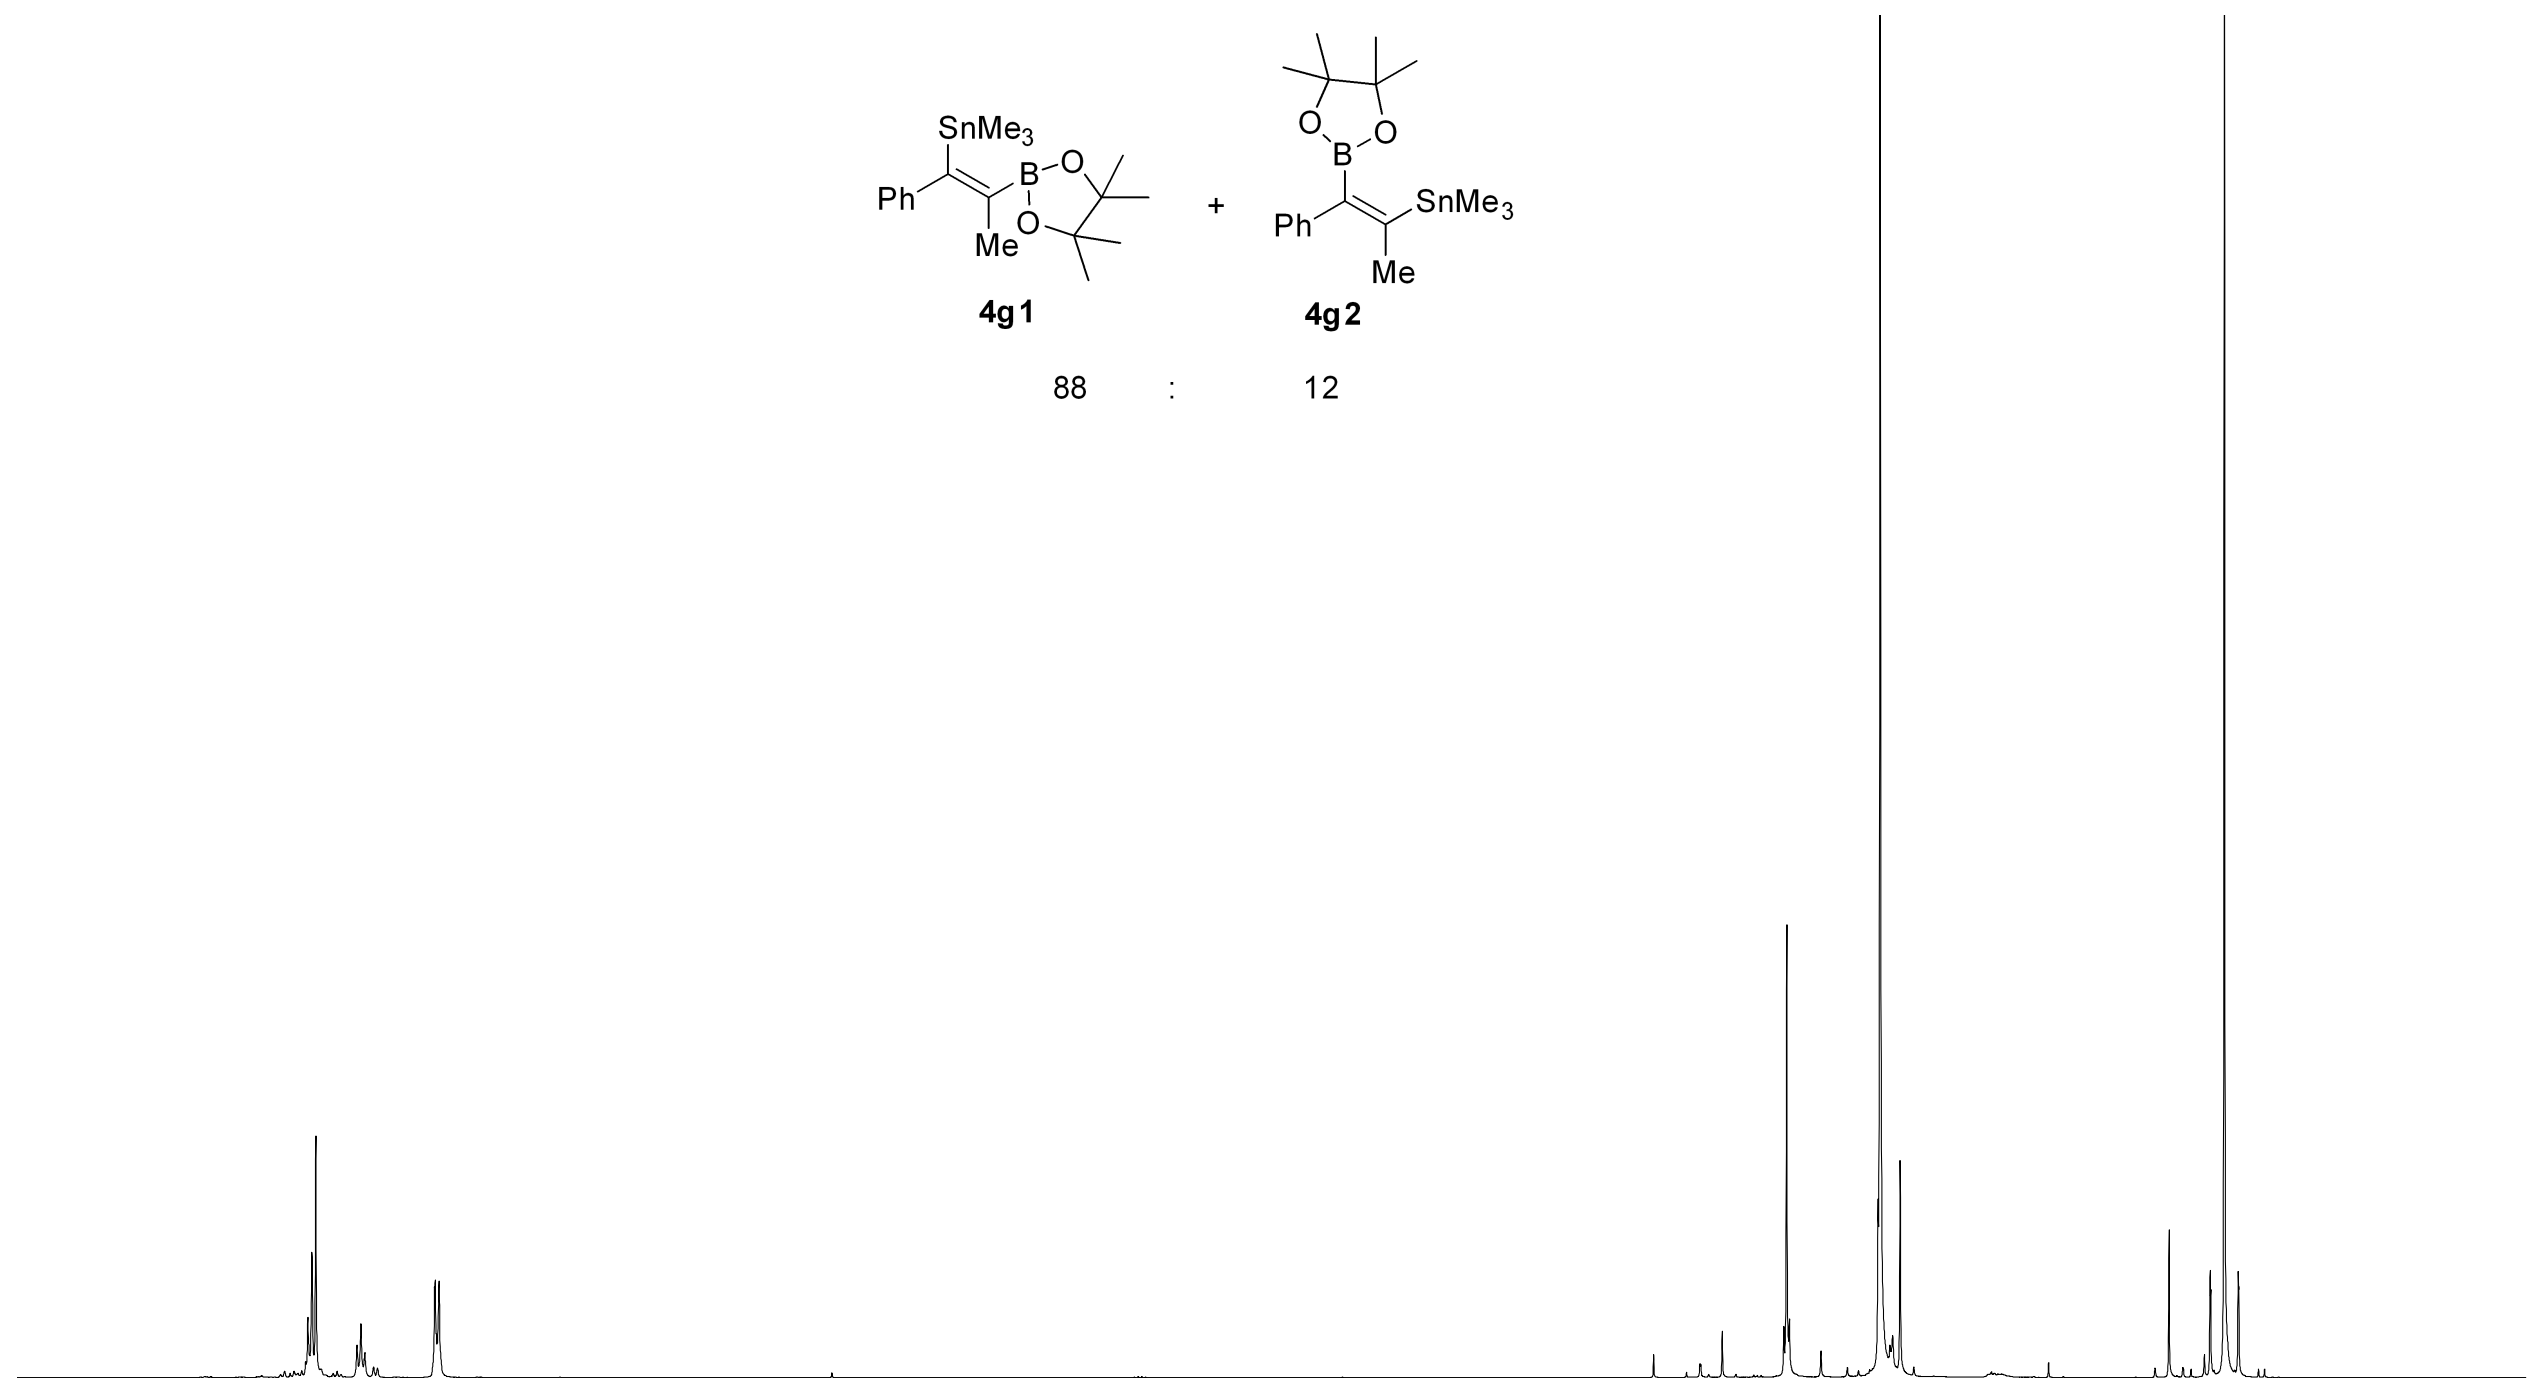

3.00  
0.11  
1.00  
0.18  
1.99

0.08  
0.15  
0.27  
3.12  
13.19  
1.20

0.83  
9.27

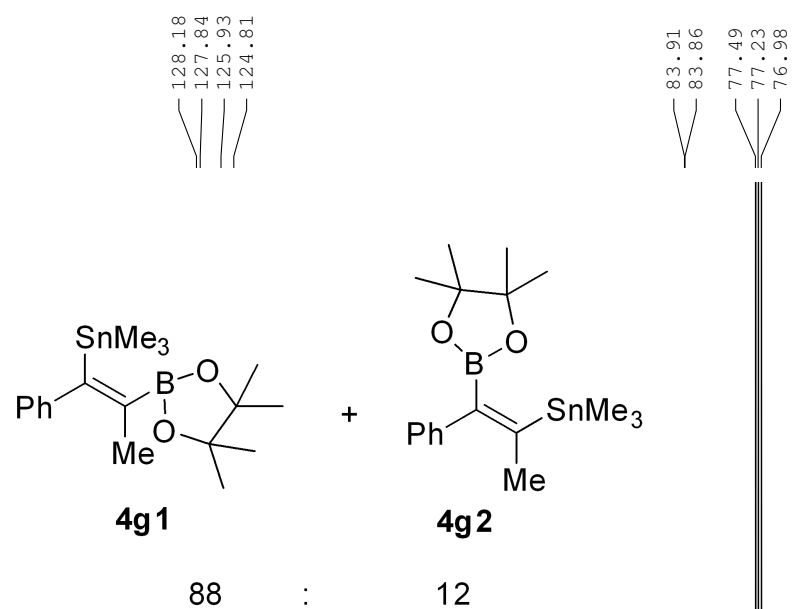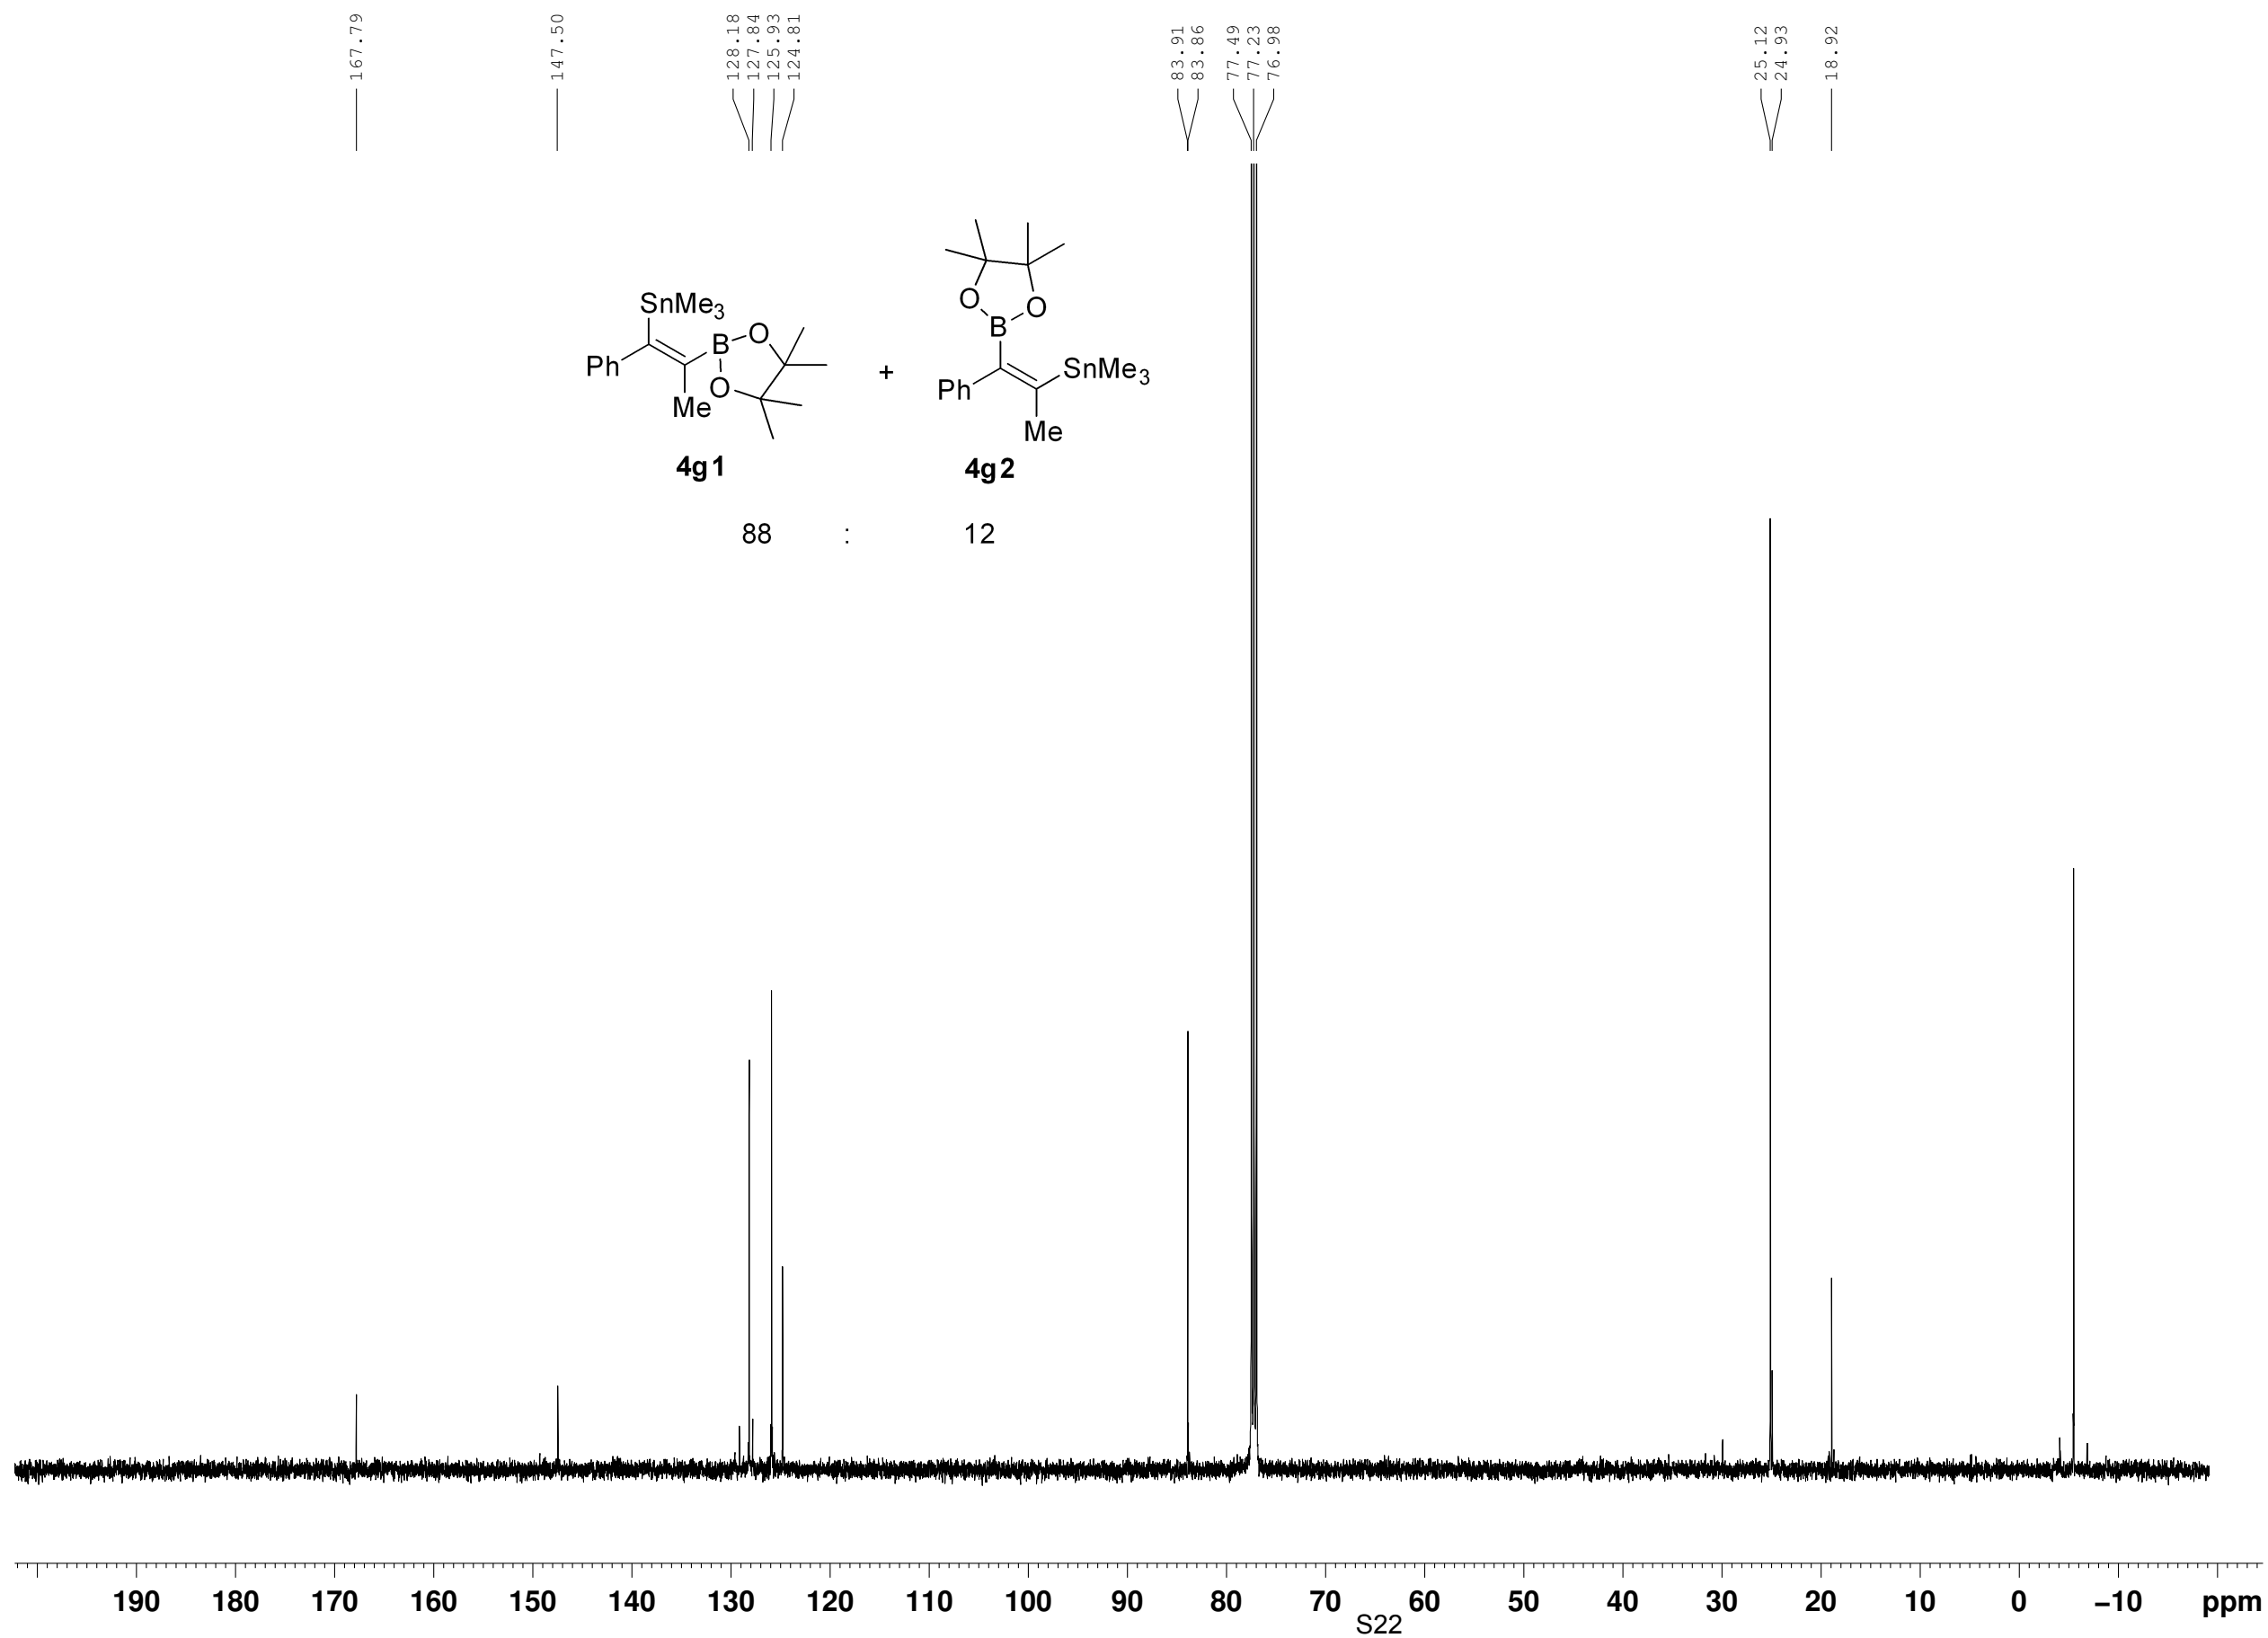

Current Data Parameters  
 NAME Rs-3-162  
 EXPNO 3  
 PROCNO 1

F2 - Acquisition Parameters  
 Date\_ 20090205  
 Time 14.18  
 INSTRUM spect  
 PROBHD 5 mm Multinucl  
 PULPROG zgpg30  
 TD 65536  
 SOLVENT CDC13  
 NS 1284  
 DS 4  
 SWH 30030.029 Hz  
 FIDRES 0.458222 Hz  
 AQ 1.0912244 sec  
 RG 6502  
 DW 16.650 usec  
 DE 12.00 usec  
 TE 300.2 K  
 D1 2.0000000 sec  
 d11 0.03000000 sec  
 DELTA 1.89999998 sec  
 MCREST 0.00000000 sec  
 MCWRK 0.01500000 sec

==== CHANNEL f1 =====  
 NUC1 13C  
 P1 12.00 usec  
 PL1 3.00 dB  
 SFO1 125.7427020 MHz

==== CHANNEL f2 =====  
 CPDPRG2 waltz16  
 NUC2 1H  
 PCPD2 100.00 usec  
 PL2 -1.00 dB  
 PL12 15.59 dB  
 PL13 22.50 dB  
 SFO2 500.0220001 MHz

F2 - Processing parameters  
 SI 32768  
 SF 125.7301014 MHz  
 WDW EM  
 SSB 0  
 LB 1.00 Hz  
 GB 0  
 PC 1.00

7.252  
7.249  
7.240  
7.237  
7.221  
7.077  
7.075  
7.072  
7.060  
7.047  
7.045  
7.043  
6.788  
6.785  
6.781  
6.778  
6.771  
6.769

2.051  
2.036  
2.031  
2.026  
2.022  
2.007  
1.511  
1.324  
1.284  
1.256  
1.242  
1.228  
0.868  
0.853  
0.838  
0.017  
0.014  
0.002  
-0.038  
-0.090  
-0.092

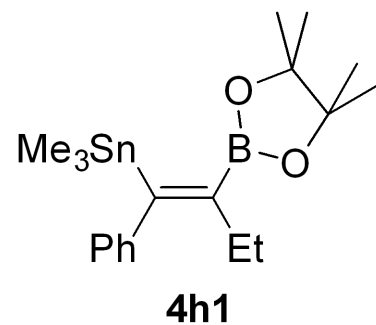

```

Current Data Parameters
NAME          Rs-3-198A
EXPNO         1
PROCNO       1

F2 - Acquisition Parameters
Date_        20090302
Time         14.37
INSTRUM      spect
PROBHD       5 mm Multinucl
PULPROG      zg30
TD           65536
SOLVENT      CDC13
NS           16
DS           2
SWH          10330.578 Hz
FIDRES       0.157632 Hz
AQ           3.1719923 sec
RG           228.1
DW           48.400 usec
DE           6.00 usec
TE           300.2 K
D1           1.00000000 sec
MCREST       0.00000000 sec
MCWRK        0.01500000 sec

===== CHANNEL f1 =====
NUC1         1H
P1           14.80 usec
PL1          -1.00 dB
SFO1         500.0230878 MHz

F2 - Processing parameters
SI           32768
SF           500.0200216 MHz
WDW          EM
SSB          0
LB           0.30 Hz
GB           0
PC           1.00
  
```

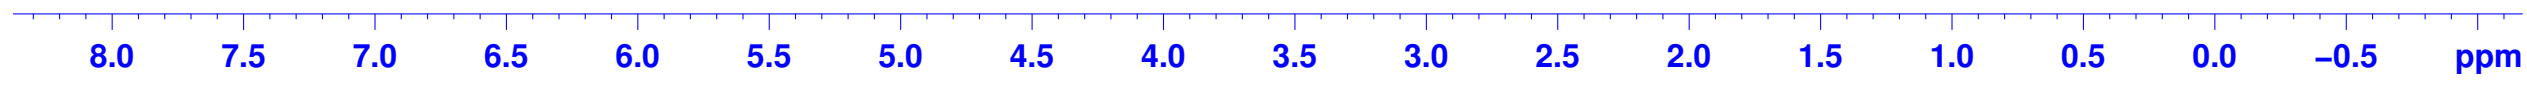

2.47  
1.00  
1.98

2.16  
12.67  
3.85  
9.17

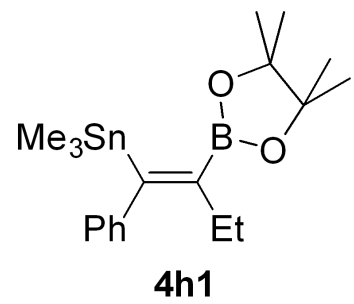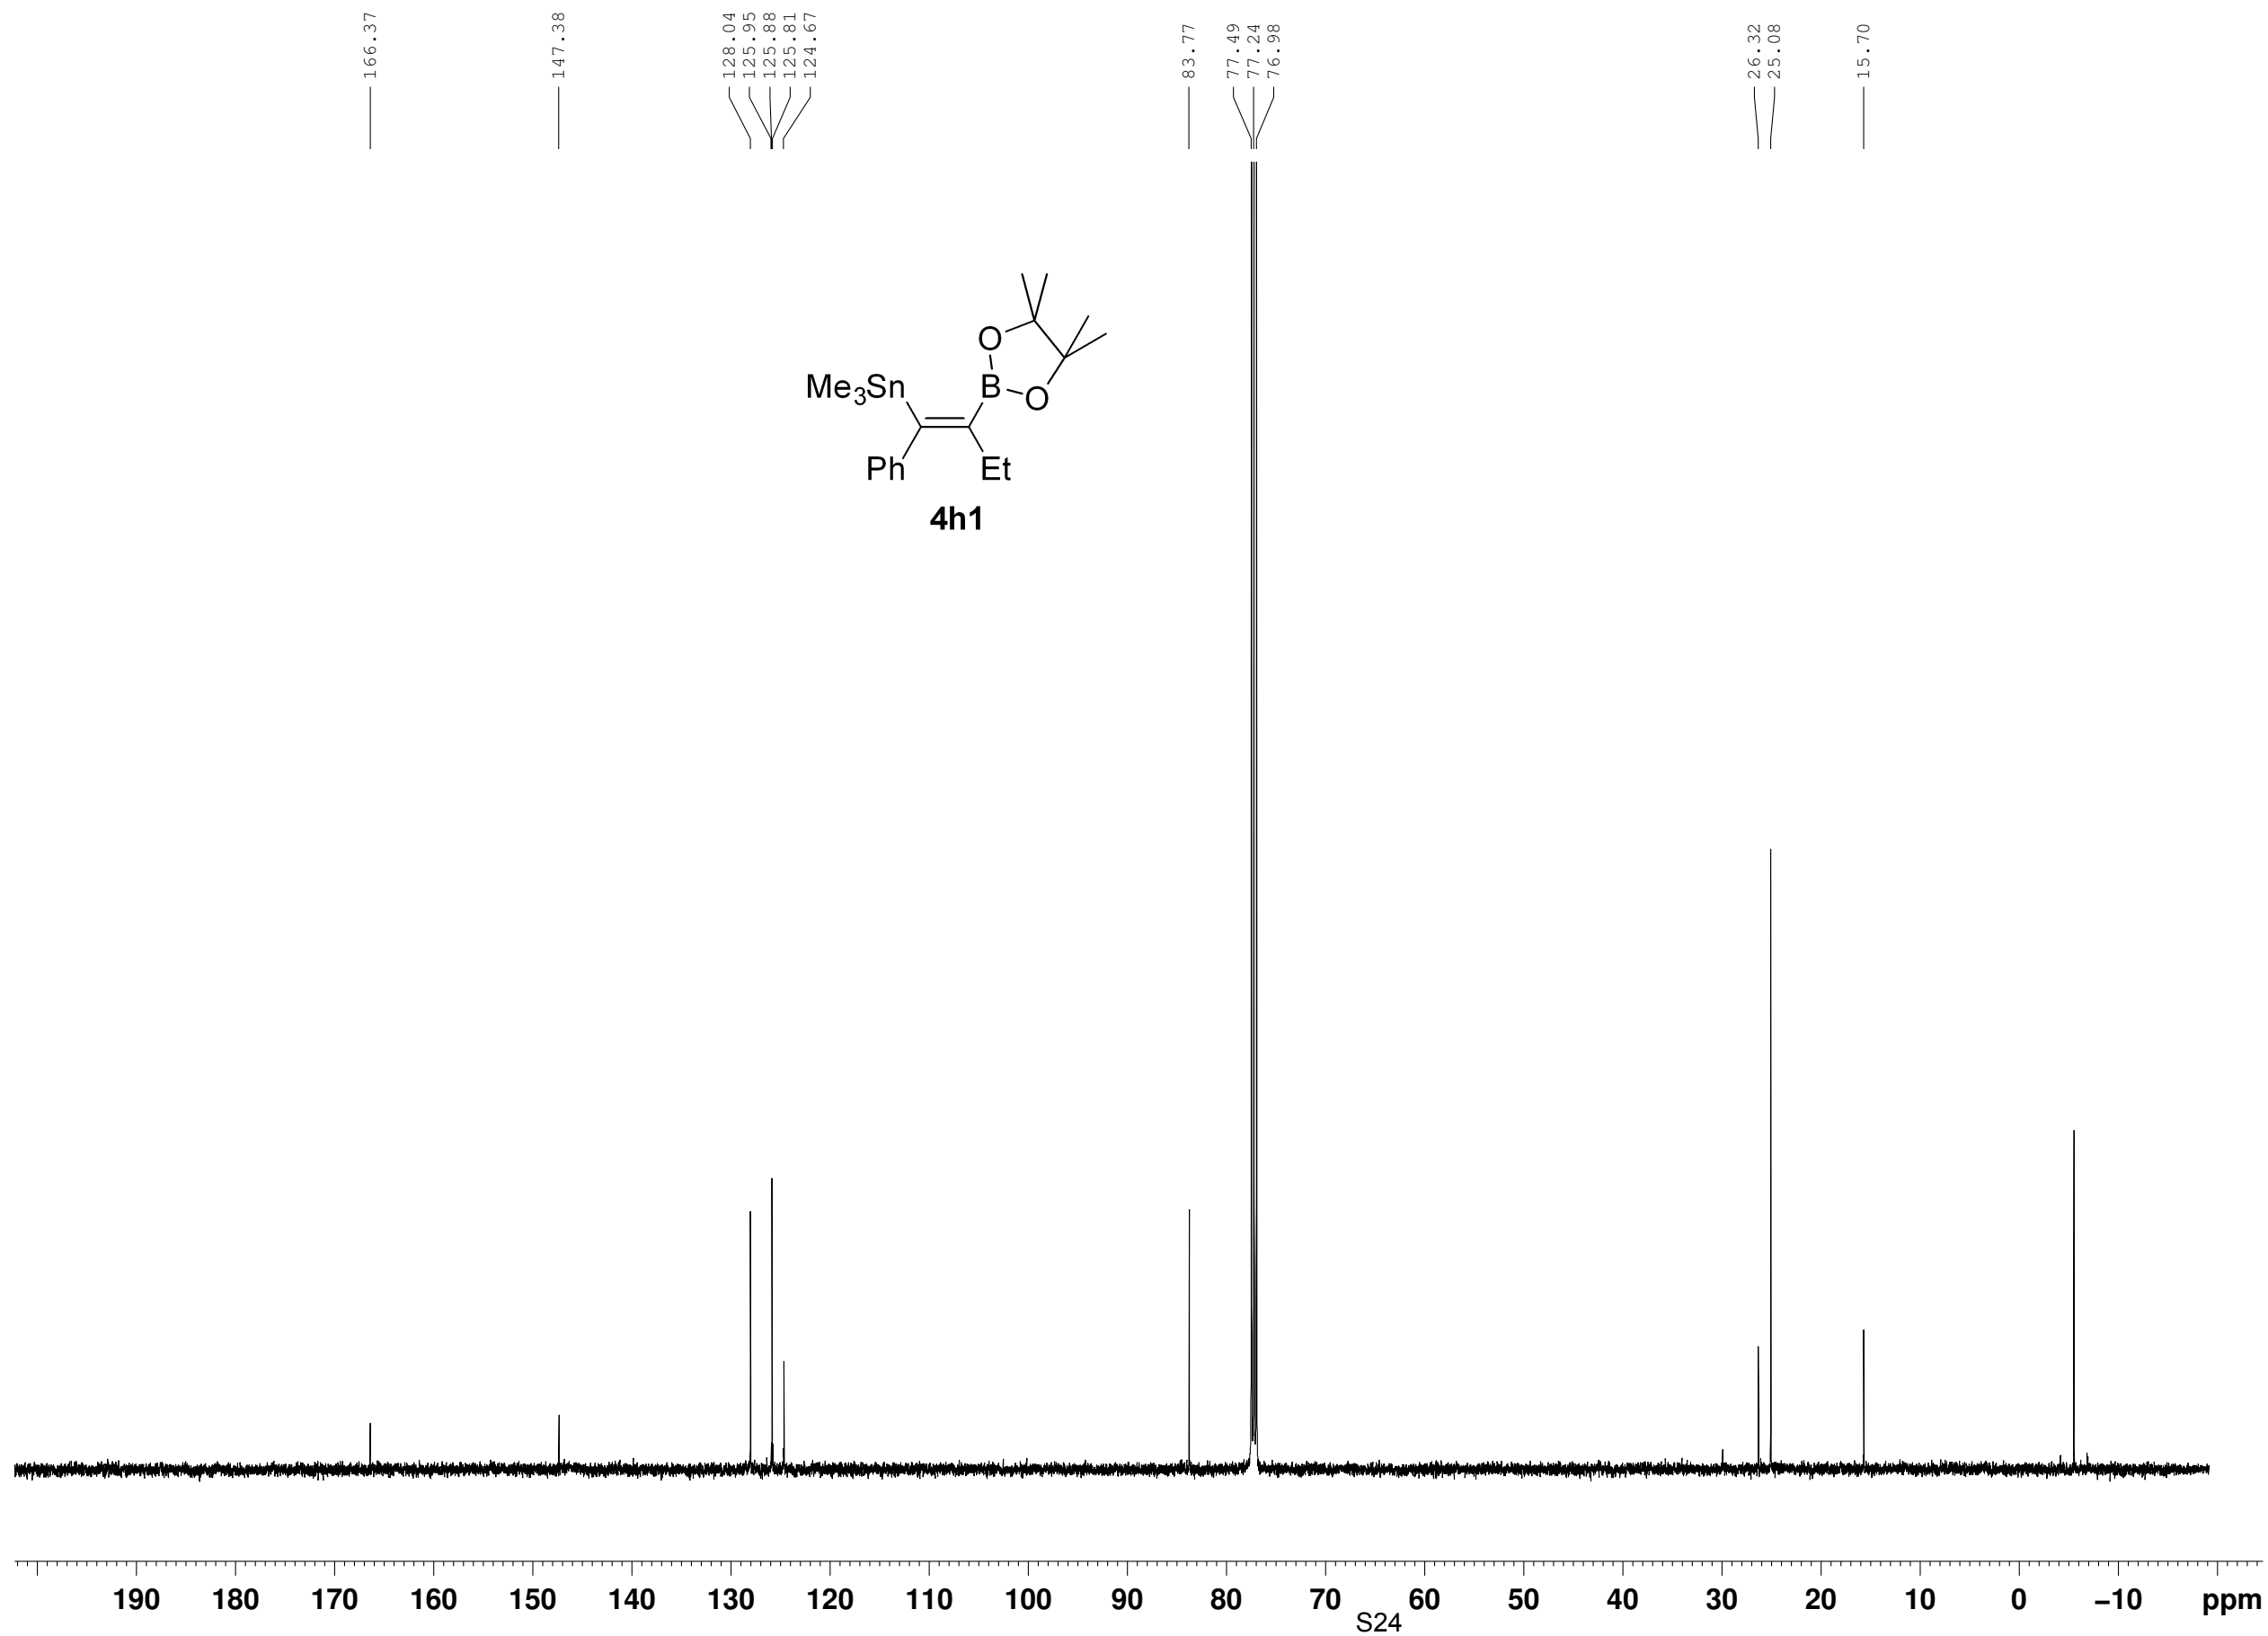

Current Data Parameters  
 NAME Rs-3-198A  
 EXPNO 2  
 PROCNO 1

F2 - Acquisition Parameters  
 Date\_ 20090302  
 Time 15.39  
 INSTRUM spect  
 PROBHD 5 mm Multinucl  
 PULPROG zgpg30  
 TD 65536  
 SOLVENT CDCl3  
 NS 870  
 DS 4  
 SWH 30030.029 Hz  
 FIDRES 0.458222 Hz  
 AQ 1.0912244 sec  
 RG 2580.3  
 DW 16.650 usec  
 DE 12.00 usec  
 TE 300.2 K  
 D1 2.0000000 sec  
 d11 0.03000000 sec  
 DELTA 1.89999998 sec  
 MCREST 0.00000000 sec  
 MCWRK 0.01500000 sec

==== CHANNEL f1 =====  
 NUC1 13C  
 P1 12.00 usec  
 PL1 3.00 dB  
 SFO1 125.7427020 MHz

==== CHANNEL f2 =====  
 CPDPRG2 waltz16  
 NUC2 1H  
 PCPD2 100.00 usec  
 PL2 -1.00 dB  
 PL12 15.59 dB  
 PL13 22.50 dB  
 SFO2 500.0220001 MHz

F2 - Processing parameters  
 SI 32768  
 SF 125.7301005 MHz  
 WDW EM  
 SSB 0  
 LB 1.00 Hz  
 GB 0  
 PC 1.00



7.311  
7.307  
7.301  
7.279  
7.264  
7.249  
7.240  
7.183  
7.174  
7.159  
7.001  
6.998  
6.985

5.278

2.379  
2.364  
2.205  
2.190  
2.025  
1.504  
1.295  
1.283  
1.254  
1.253  
1.248  
1.240  
1.226  
1.200  
1.093  
1.078  
1.063  
0.813  
0.798  
0.783  
0.248  
0.246  
0.194  
0.142  
0.140  
0.052  
-0.040

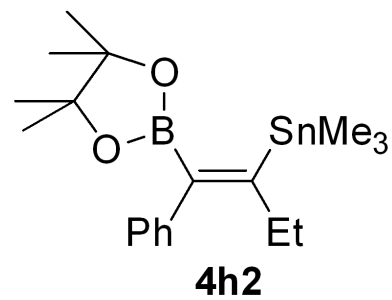

Current Data Parameters  
 NAME Rs-3-198B  
 EXPNO 1  
 PROCNO 1

F2 - Acquisition Parameters  
 Date\_ 20090302  
 Time 14.47  
 INSTRUM spect  
 PROBHD 5 mm Multinucl  
 PULPROG zg30  
 TD 65536  
 SOLVENT CDCl3  
 NS 16  
 DS 2  
 SWH 10330.578 Hz  
 FIDRES 0.157632 Hz  
 AQ 3.1719923 sec  
 RG 724.1  
 DW 48.400 usec  
 DE 6.00 usec  
 TE 300.2 K  
 D1 1.00000000 sec  
 MCREST 0.00000000 sec  
 MCWRK 0.01500000 sec

==== CHANNEL f1 =====  
 NUC1 1H  
 P1 14.80 usec  
 PL1 -1.00 dB  
 SFO1 500.0230878 MHz

F2 - Processing parameters  
 SI 32768  
 SF 500.0200216 MHz  
 WDW EM  
 SSB 0  
 LB 0.30 Hz  
 GB 0  
 PC 1.00

8.0 7.5 7.0 6.5 6.0 5.5 5.0 4.5 4.0 3.5 3.0 2.5 2.0 1.5 1.0 0.5 0.0 -0.5 ppm

0.94  
1.09  
0.79  
1.00

0.51  
1.12

3.38  
6.46  
0.96

1.74

4.69

7.282  
7.267  
7.253  
7.240  
7.222  
7.187  
7.176  
7.161  
7.078  
7.075  
7.073  
7.061  
7.048  
7.046  
7.004  
7.002  
6.988  
6.789  
6.786  
6.782  
6.772

2.383  
2.368  
2.224  
2.209  
2.194  
2.179  
2.053  
2.038  
2.032  
2.023  
2.008  
1.508  
1.410  
1.325  
1.297  
1.285  
1.257  
1.254  
1.243  
1.228  
1.202  
1.157  
1.097  
1.082  
1.067  
0.869  
0.855  
0.840  
0.816  
0.801  
0.786  
0.251  
0.249  
0.197  
0.146  
0.143  
0.090  
0.056  
0.018

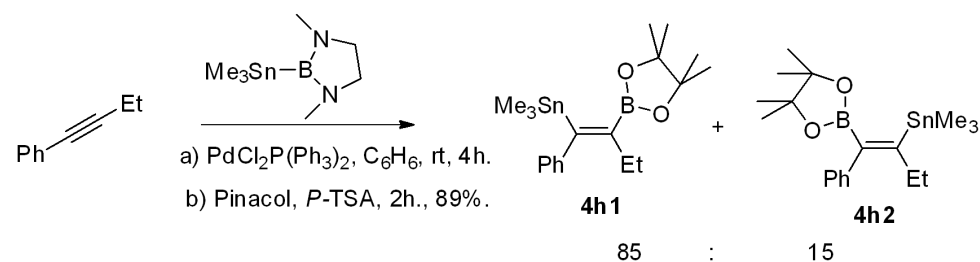

Current Data Parameters  
NAME Rs-3-198P  
EXPNO 1  
PROCNO 1

F2 - Acquisition Parameters  
Date\_ 20090302  
Time 11.09  
INSTRUM spect  
PROBHD 5 mm Multinucl  
PULPROG zg30  
TD 65536  
SOLVENT CDC13  
NS 16  
DS 2  
SWH 10330.578 Hz  
FIDRES 0.157632 Hz  
AQ 3.1719923 sec  
RG 203.2  
DW 48.400 usec  
DE 6.00 usec  
TE 300.2 K  
D1 1.00000000 sec  
MCREST 0.00000000 sec  
MCWRK 0.01500000 sec

==== CHANNEL f1 =====  
NUC1 1H  
P1 14.80 usec  
PL1 -1.00 dB  
SFO1 500.0230878 MHz

F2 - Processing parameters  
SI 32768  
SF 500.0200213 MHz  
WDW EM  
SSB 0  
LB 0.30 Hz  
GB 0  
PC 1.00

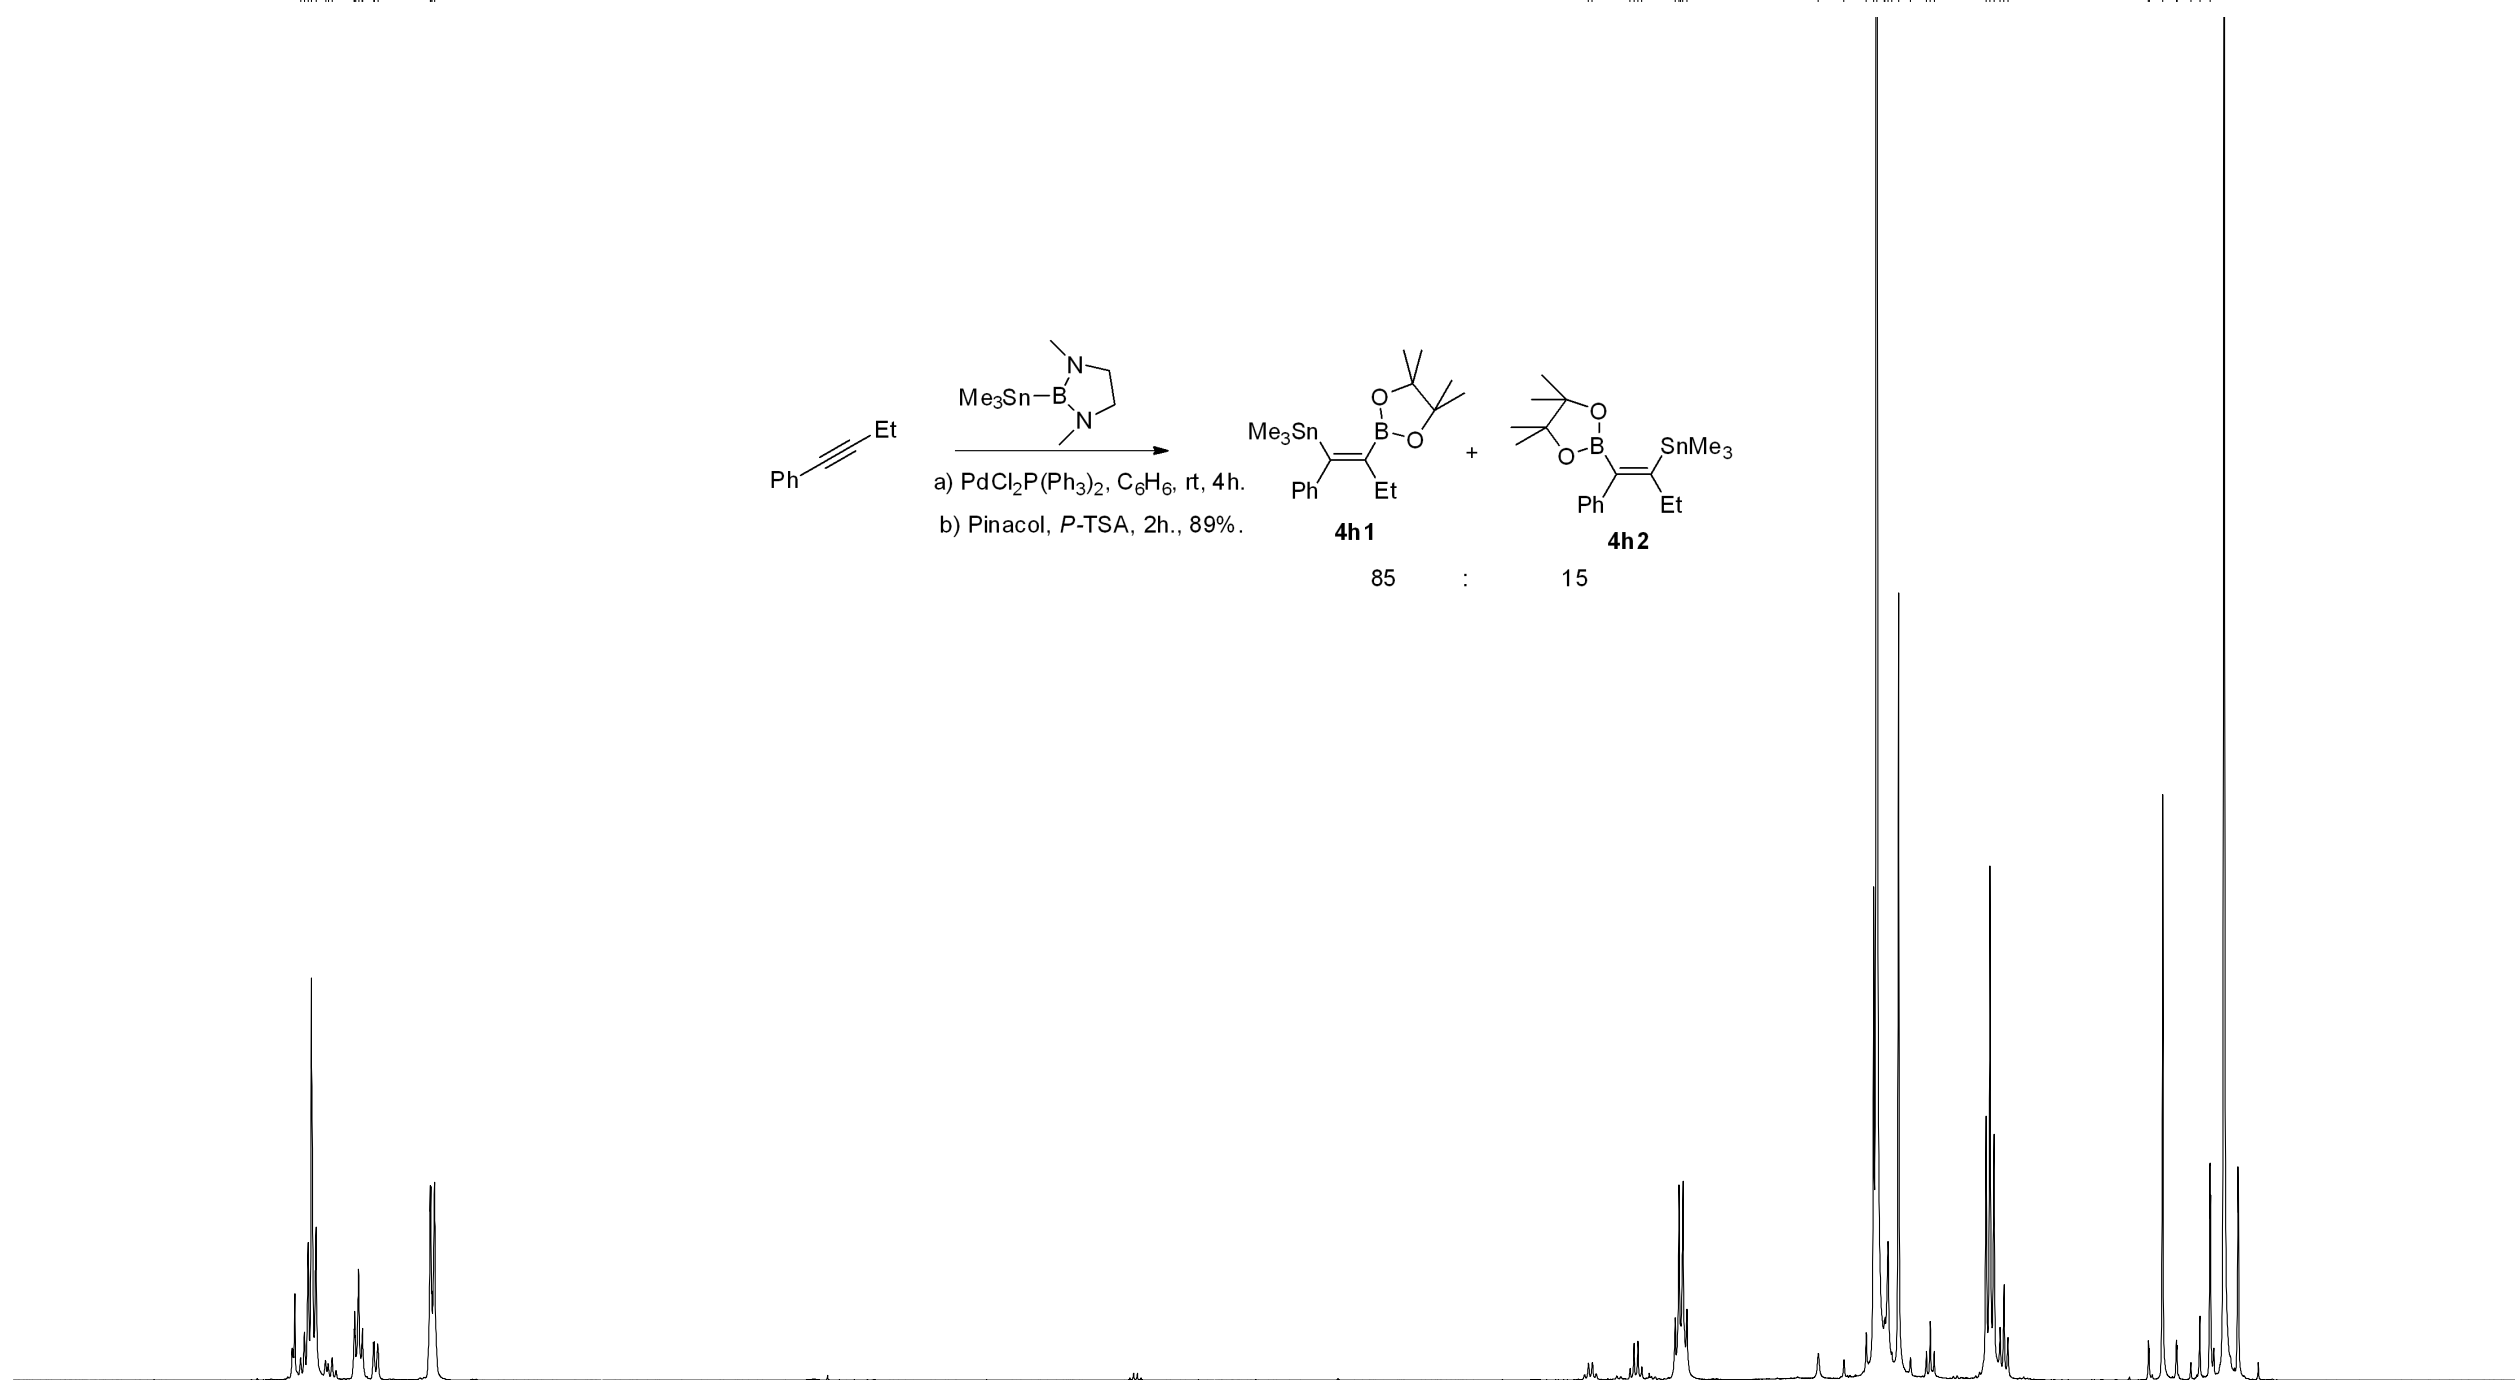

8.0 7.5 7.0 6.5 6.0 5.5 5.0 4.5 4.0 3.5 3.0 2.5 2.0 1.5 1.0 0.5 0.0 -0.5 ppm

0.31  
2.95  
0.26  
1.00  
0.32  
1.98

0.17  
0.35  
2.17

13.81  
1.11  
2.33  
0.34  
3.42  
0.66

1.57  
0.19  
9.30

7.281  
7.266  
7.253  
7.240  
7.222  
7.187  
7.176  
7.161  
7.075  
7.060  
7.045  
7.004  
6.987  
6.788  
6.786  
6.772

3.336  
2.620  
2.595  
2.383  
2.368  
2.209  
2.194  
2.151  
2.053  
2.038  
2.023  
2.008  
1.417  
1.410  
1.384  
1.359  
1.323  
1.315  
1.297  
1.285  
1.254  
1.243  
1.225  
1.202  
1.178  
1.157  
1.097  
1.082  
1.067  
0.981  
0.967  
0.902  
0.869  
0.854  
0.839  
0.816  
0.801  
0.786  
0.769  
0.640  
0.634  
0.251  
0.197

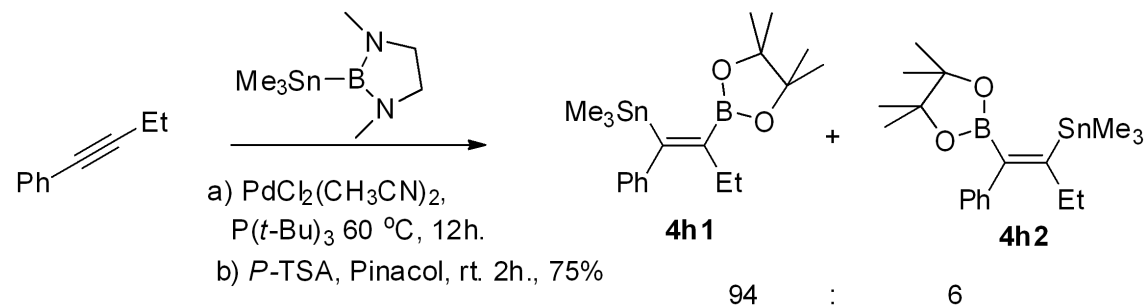

Current Data Parameters  
NAME Rs-3-201C  
EXPNO 1  
PROCNO 1

F2 - Acquisition Parameters  
Date\_ 20090304  
Time 12.29  
INSTRUM spect  
PROBHD 5 mm Multinucl  
PULPROG zg30  
TD 65536  
SOLVENT CDCl3  
NS 16  
DS 2  
SWH 10330.578 Hz  
FIDRES 0.157632 Hz  
AQ 3.1719923 sec  
RG 203.2  
DW 48.400 usec  
DE 6.00 usec  
TE 300.2 K  
D1 1.00000000 sec  
MCREST 0.00000000 sec  
MCWRK 0.01500000 sec

==== CHANNEL f1 =====  
NUC1 1H  
P1 14.80 usec  
PL1 -1.00 dB  
SFO1 500.0230878 MHz

F2 - Processing parameters  
SI 32768  
SF 500.0200213 MHz  
WDW EM  
SSB 0  
LB 0.30 Hz  
GB 0  
PC 1.00

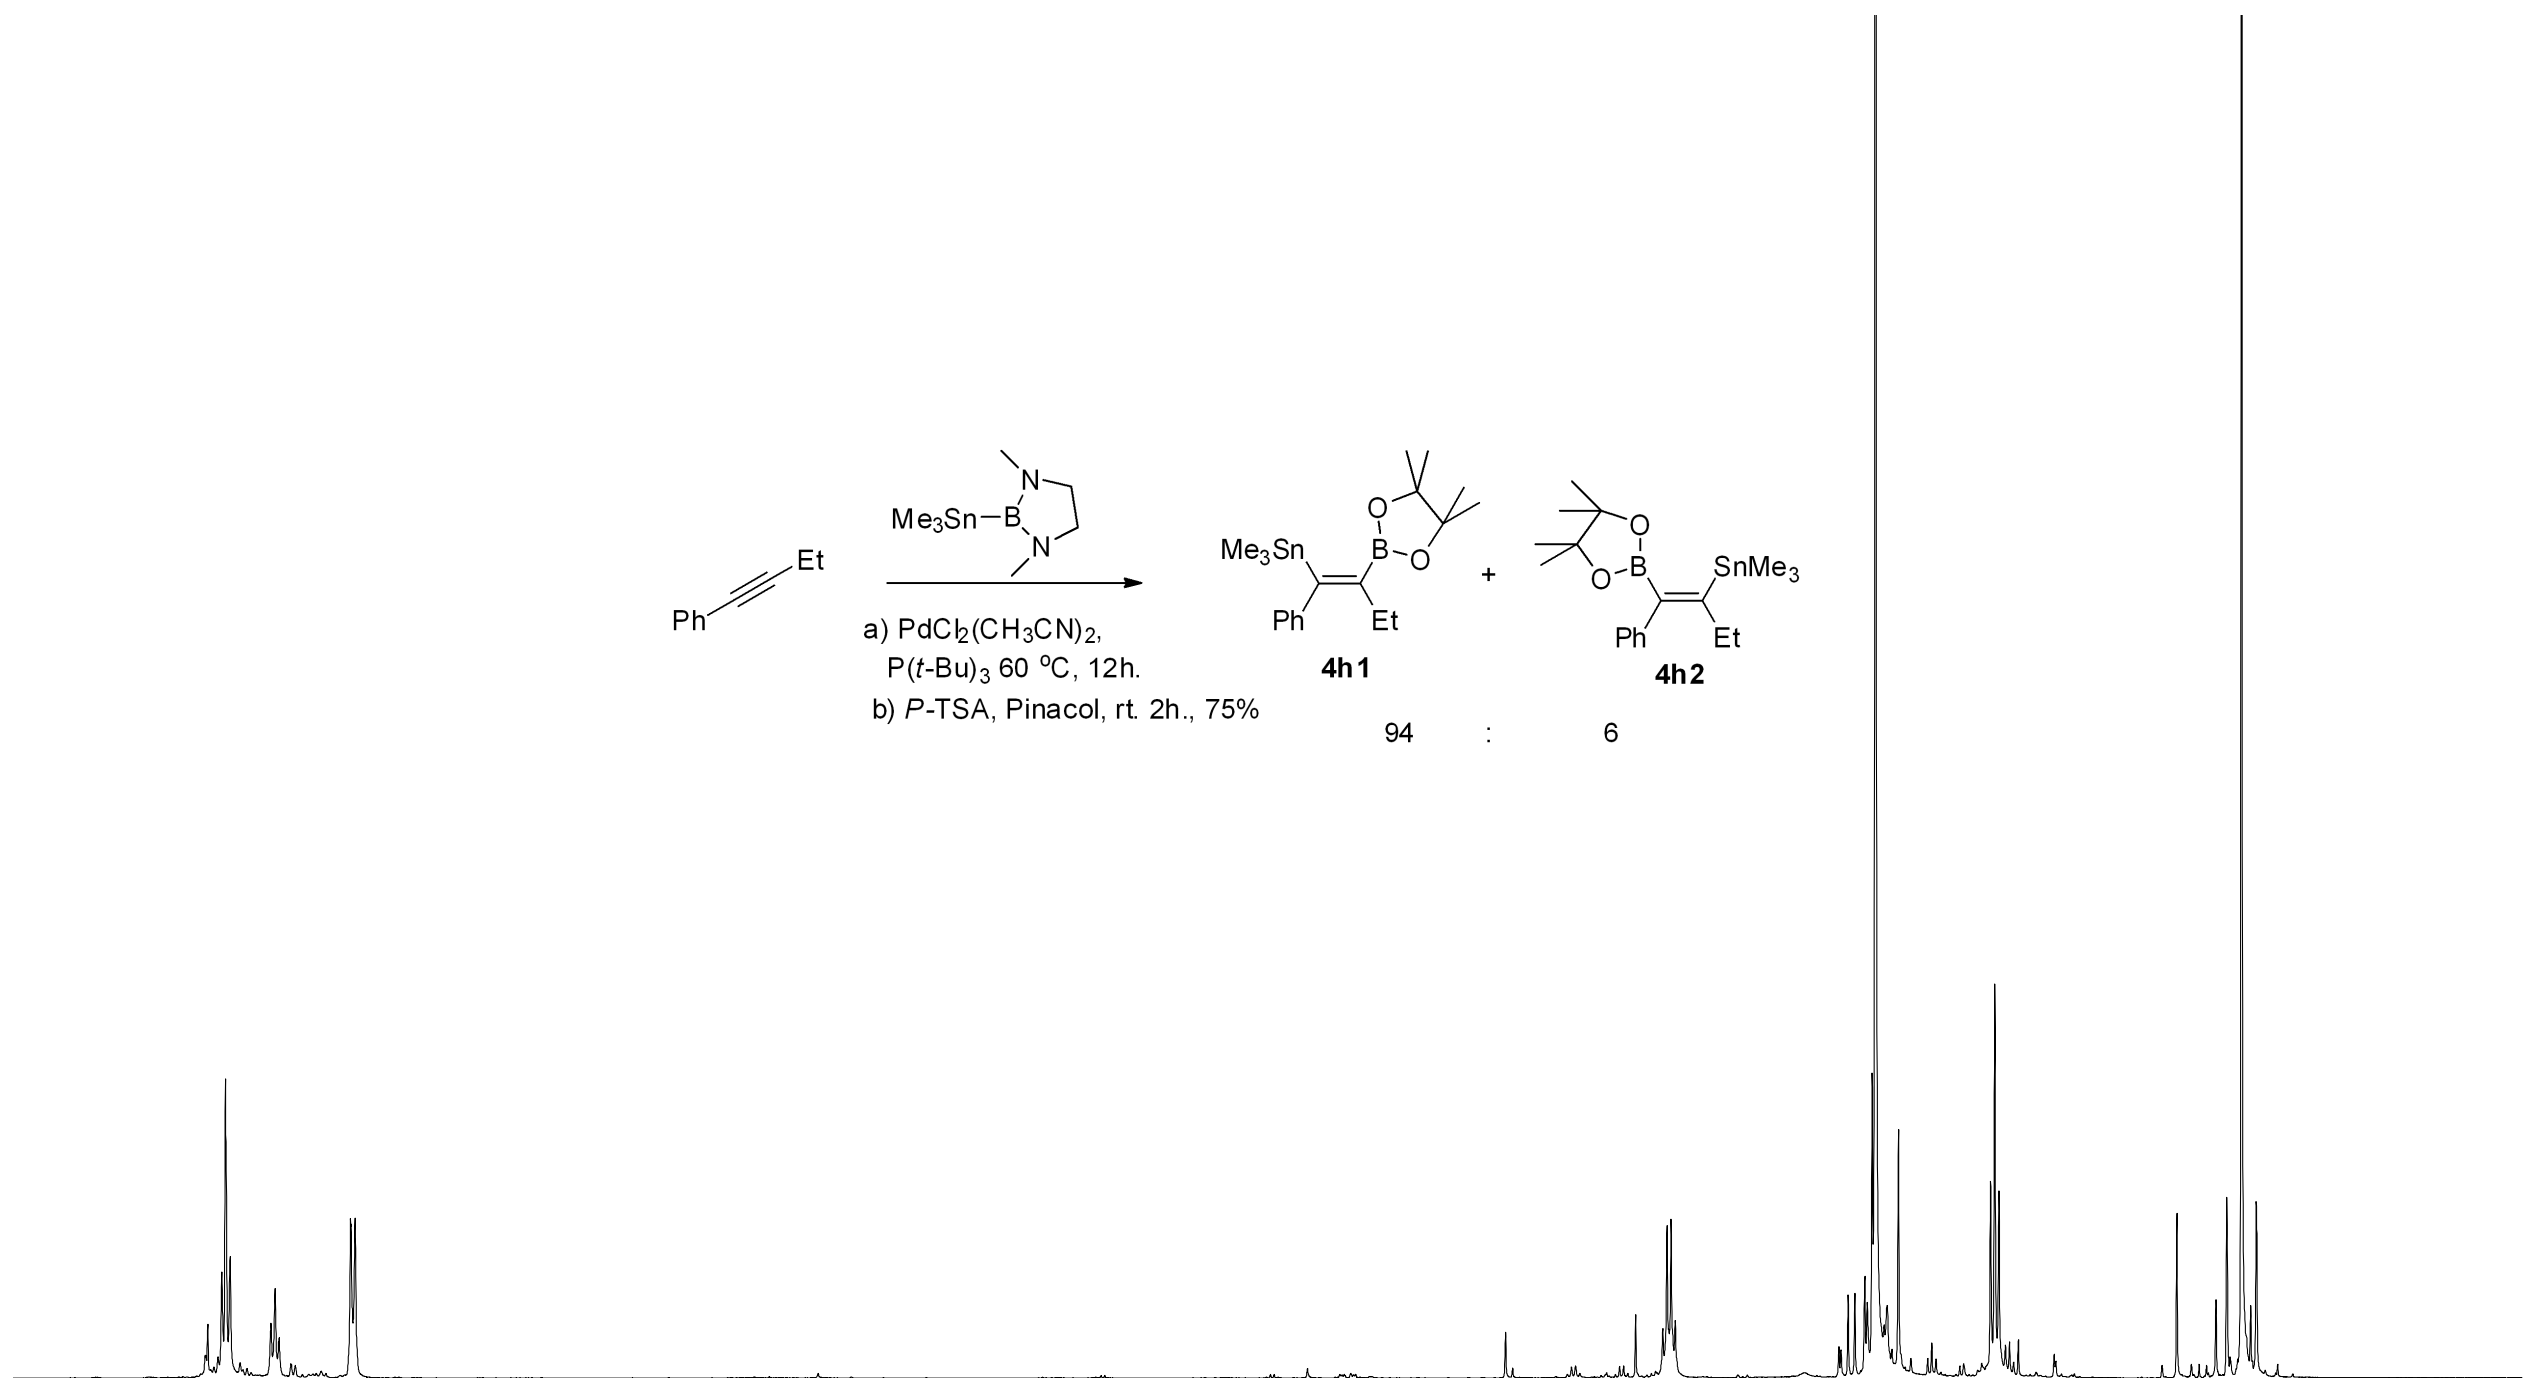

7.5 7.0 6.5 6.0 5.5 5.0 4.5 4.0 3.5 3.0 2.5 2.0 1.5 1.0 0.5 0.0 -0.5 ppm

0.37  
2.66  
1.00  
0.14  
1.85

0.12  
0.10  
2.04

0.21  
0.56  
14.17  
1.02  
0.29  
3.17  
0.37

0.58  
0.28  
8.94

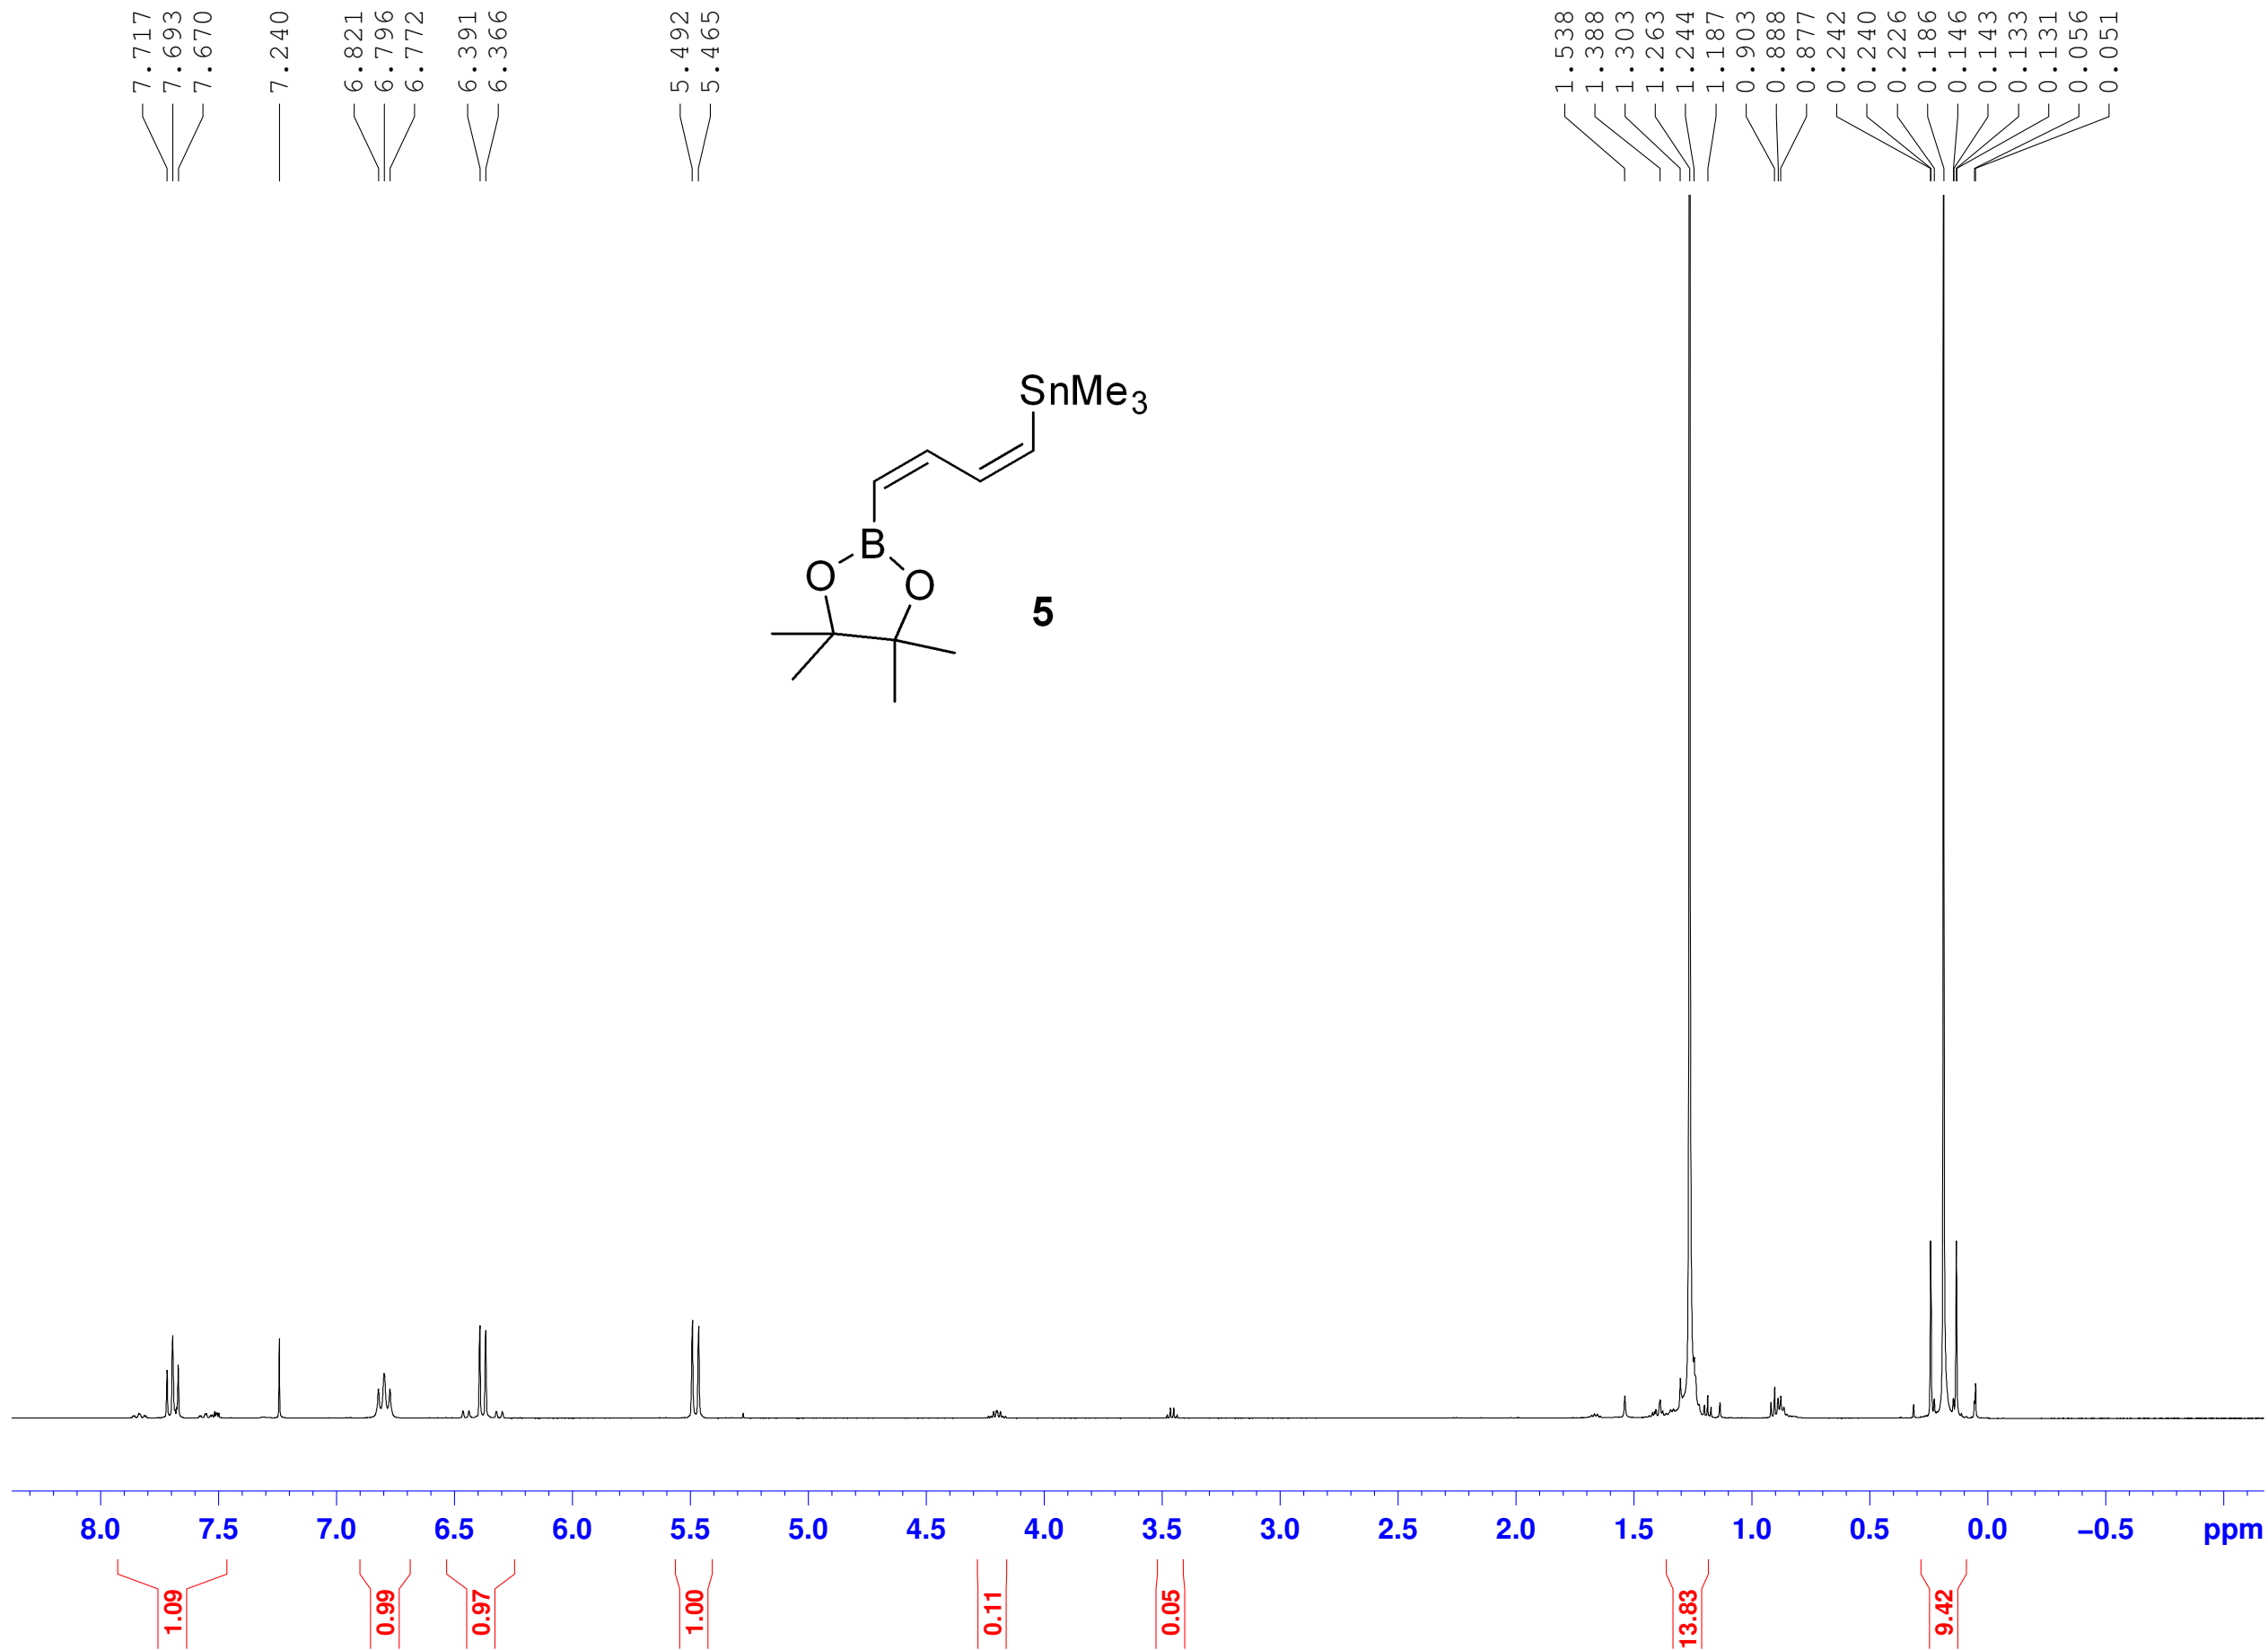

Current Data Parameters  
 NAME Rs-3-227  
 EXPNO 1  
 PROCNO 1

F2 - Acquisition Parameters  
 Date\_ 20090321  
 Time 11.16  
 INSTRUM spect  
 PROBHD 5 mm Multinucl  
 PULPROG zg30  
 TD 65536  
 SOLVENT CDCl3  
 NS 16  
 DS 2  
 SWH 10330.578 Hz  
 FIDRES 0.157632 Hz  
 AQ 3.1719923 sec  
 RG 181  
 DW 48.400 usec  
 DE 6.00 usec  
 TE 300.2 K  
 D1 1.00000000 sec  
 MCREST 0.00000000 sec  
 MCWRK 0.01500000 sec

==== CHANNEL f1 =====  
 NUC1 1H  
 P1 14.80 usec  
 PL1 -1.00 dB  
 SFO1 500.0230878 MHz

F2 - Processing parameters  
 SI 32768  
 SF 500.0200210 MHz  
 WDW EM  
 SSB 0  
 LB 0.30 Hz  
 GB 0  
 PC 1.00

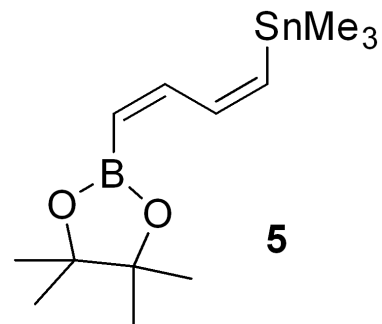

151.93  
146.48  
141.08

83.40  
77.49  
77.23  
76.98

25.08

Current Data Parameters  
NAME Rs-3-227  
EXPNO 2  
PROCNO 1

F2 - Acquisition Parameters  
Date\_ 20090321  
Time 11.22  
INSTRUM spect  
PROBHD 5 mm Multinucl  
PULPROG zgpg30  
TD 65536  
SOLVENT CDC13  
NS 148  
DS 4  
SWH 30030.029 Hz  
FIDRES 0.458222 Hz  
AQ 1.0912244 sec  
RG 4597.6  
DW 16.650 usec  
DE 12.00 usec  
TE 300.2 K  
D1 2.0000000 sec  
d11 0.03000000 sec  
DELTA 1.89999998 sec  
MCREST 0.00000000 sec  
MCWRK 0.01500000 sec

==== CHANNEL f1 =====  
NUC1 13C  
P1 12.00 usec  
PL1 3.00 dB  
SFO1 125.7427020 MHz

==== CHANNEL f2 =====  
CPDPRG2 waltz16  
NUC2 1H  
PCPD2 100.00 usec  
PL2 -1.00 dB  
PL12 15.59 dB  
PL13 22.50 dB  
SFO2 500.0220001 MHz

F2 - Processing parameters  
SI 32768  
SF 125.7301014 MHz  
WDW EM  
SSB 0  
LB 1.00 Hz  
GB 0  
PC 1.00

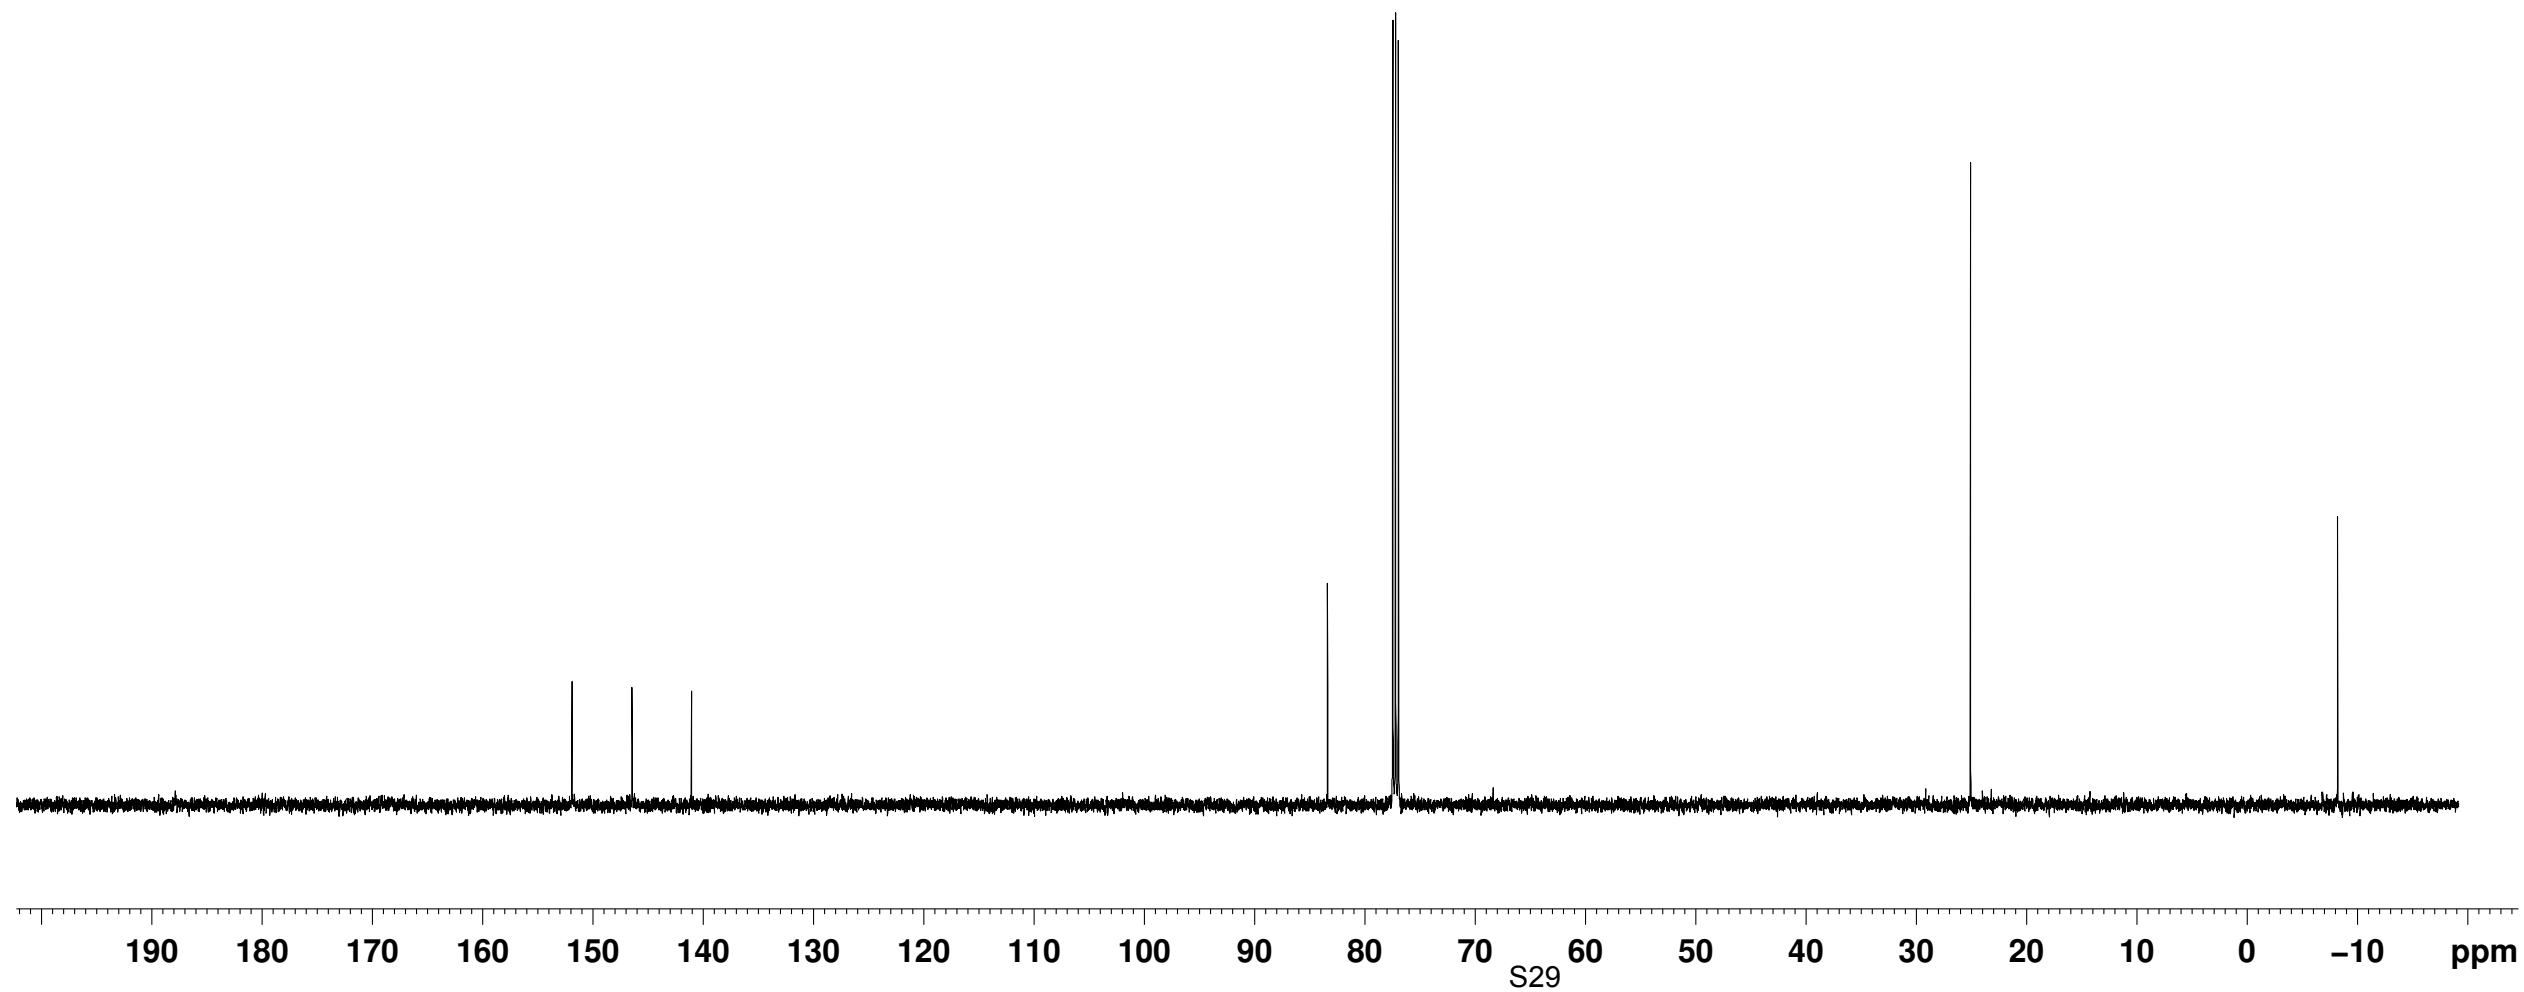

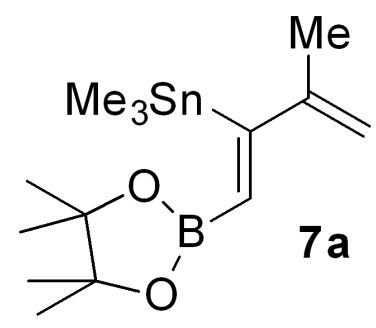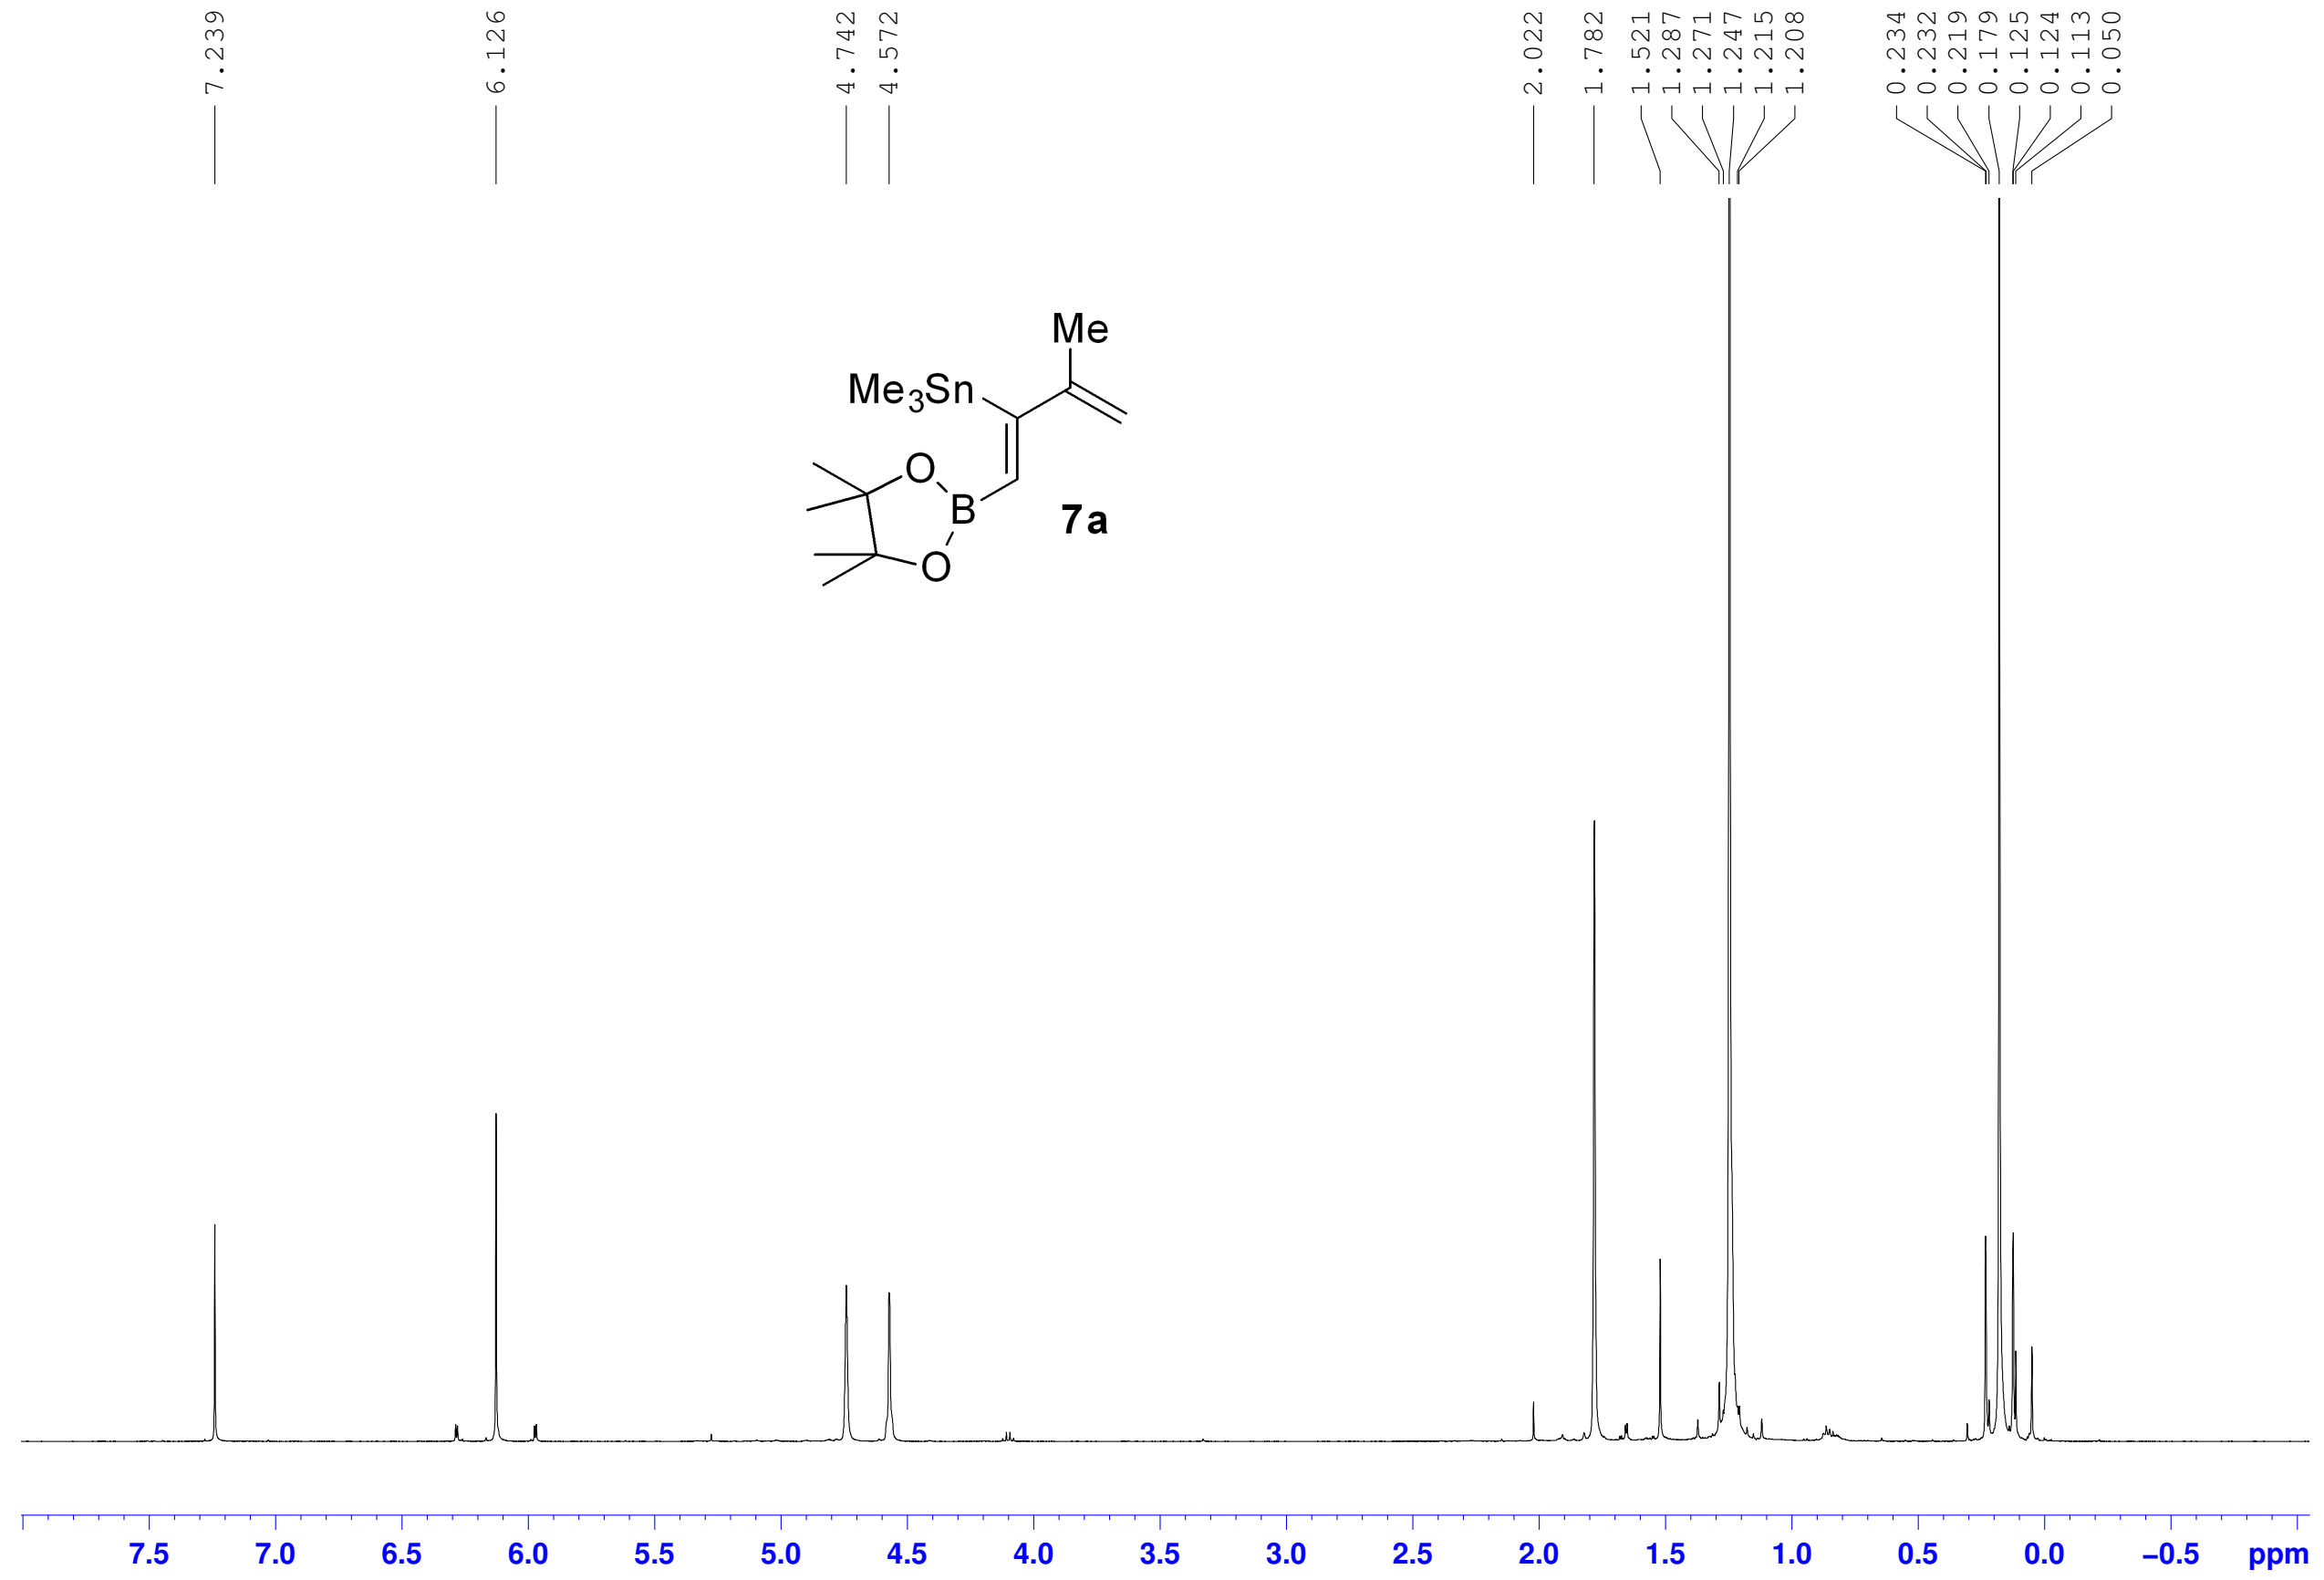

7.239

6.126

4.742

4.572

2.022

1.782

1.521

1.287

1.271

1.247

1.215

1.208

0.234

0.232

0.219

0.179

0.125

0.124

0.113

0.050

```

Current Data Parameters
NAME          Rs-3-218P
EXPNO         1
PROCNO        1

F2 - Acquisition Parameters
Date_         20090318
Time          8.27
INSTRUM       spect
PROBHD        5 mm Multinucl
PULPROG       zg30
TD            65536
SOLVENT       CDC13
NS            16
DS            2
SWH           10330.578 Hz
FIDRES        0.157632 Hz
AQ            3.1719923 sec
RG            228.1
DW            48.400 usec
DE            6.00 usec
TE            300.2 K
D1            1.00000000 sec
MCREST        0.00000000 sec
MCWRK         0.01500000 sec

===== CHANNEL f1 =====
NUC1          1H
P1            14.80 usec
PL1           -1.00 dB
SFO1          500.0230878 MHz

F2 - Processing parameters
SI            32768
SF            500.0200219 MHz
WDW           EM
SSB           0
LB            0.30 Hz
GB            0
PC            1.00
  
```

0.86

1.00

0.99

3.03

13.56

9.30

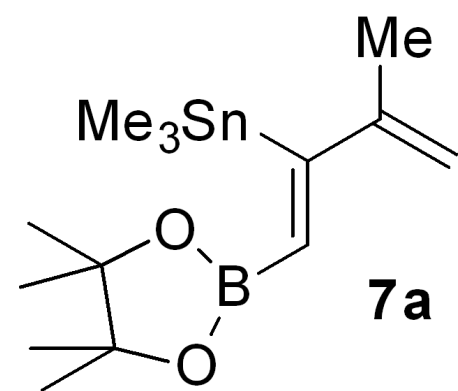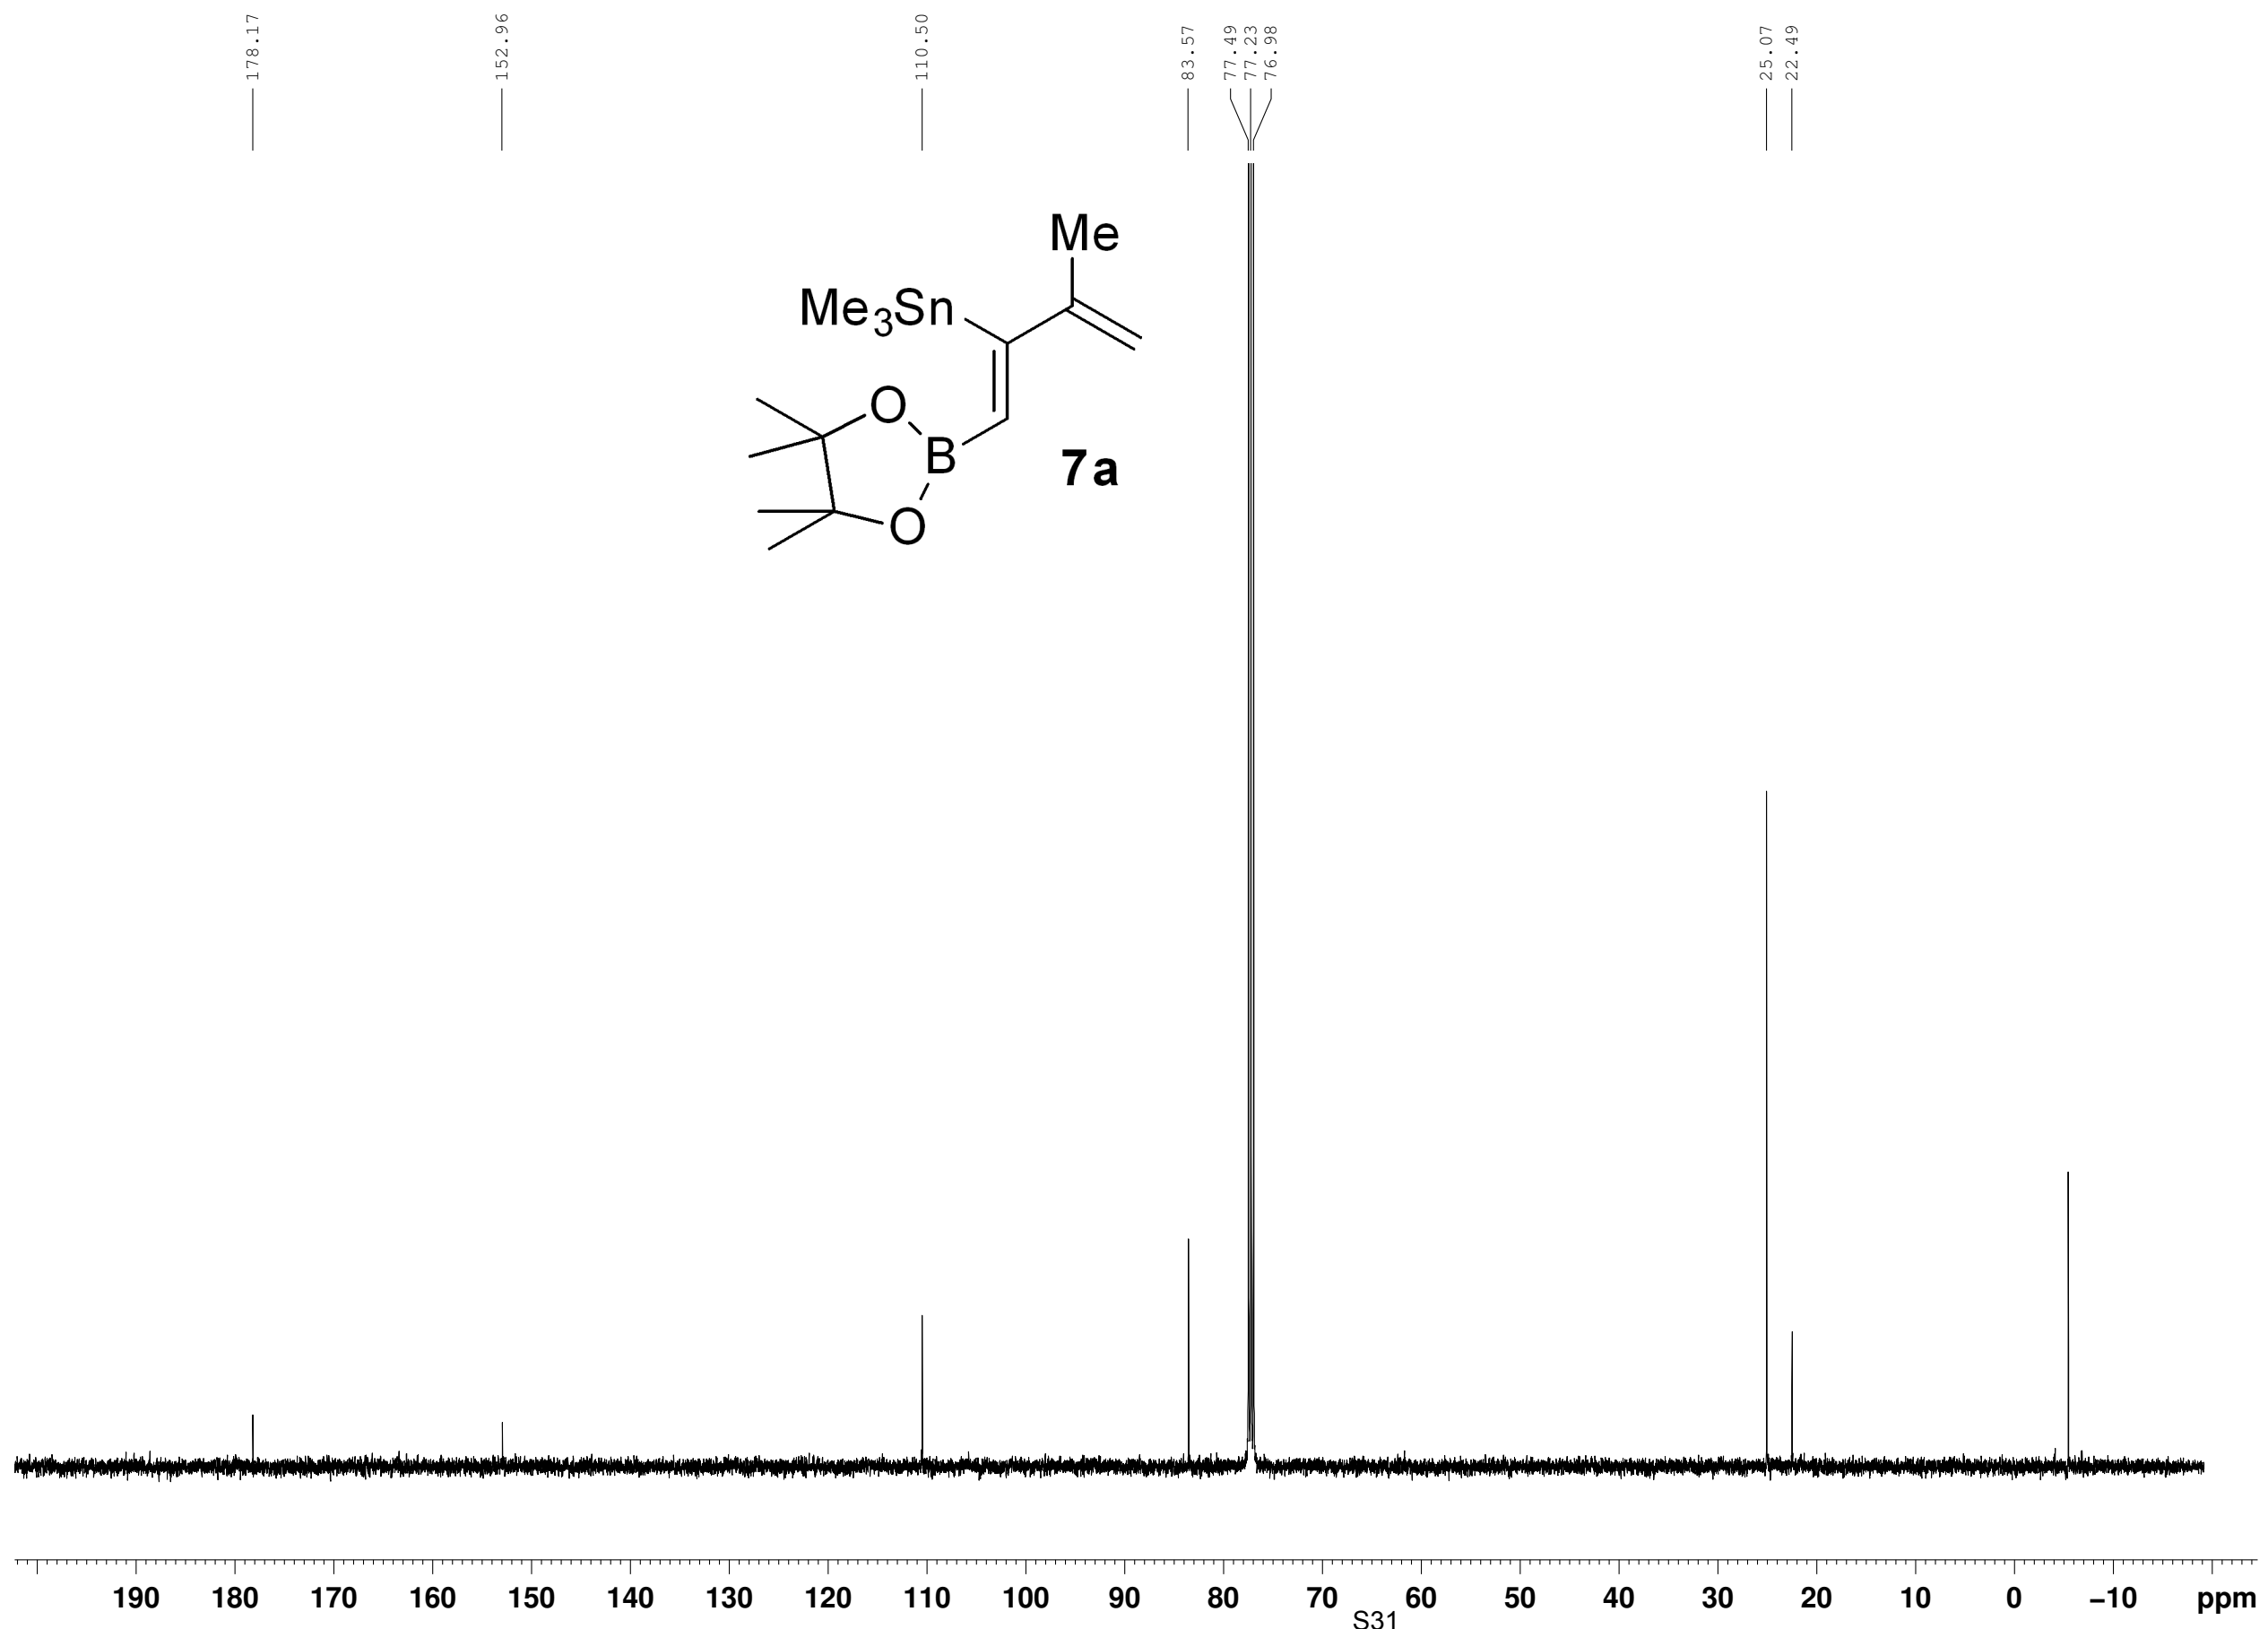

Current Data Parameters  
 NAME Rs-3-218P  
 EXPNO 2  
 PROCNO 1

F2 - Acquisition Parameters  
 Date\_ 20090318  
 Time 8.34  
 INSTRUM spect  
 PROBHD 5 mm Multinucl  
 PULPROG zgpg30  
 TD 65536  
 SOLVENT CDC13  
 NS 571  
 DS 4  
 SWH 30030.029 Hz  
 FIDRES 0.458222 Hz  
 AQ 1.0912244 sec  
 RG 2580.3  
 DW 16.650 usec  
 DE 12.00 usec  
 TE 300.2 K  
 D1 2.0000000 sec  
 d11 0.03000000 sec  
 DELTA 1.89999998 sec  
 MCREST 0.00000000 sec  
 MCWRK 0.01500000 sec

==== CHANNEL f1 =====  
 NUC1 13C  
 P1 12.00 usec  
 PL1 3.00 dB  
 SFO1 125.7427020 MHz

==== CHANNEL f2 =====  
 CPDPRG2 waltz16  
 NUC2 1H  
 PCPD2 100.00 usec  
 PL2 -1.00 dB  
 PL12 15.59 dB  
 PL13 22.50 dB  
 SFO2 500.0220001 MHz

F2 - Processing parameters  
 SI 32768  
 SF 125.7301005 MHz  
 WDW EM  
 SSB 0  
 LB 1.00 Hz  
 GB 0  
 PC 1.00

The Ohio State University  
Department of Chemistry  
NMR Facility  
400MHz - 0083

Current Data Parameters  
NAME Rs-3-248P  
EXPNO 1  
PROCNO 1

F2 - Acquisition Parameters  
Date\_ 20090417  
Time 13.38  
INSTRUM spect  
PROBHD 5 mm QNP 1H/13  
PULPROG zg30  
TD 65536  
SOLVENT CDCl3  
NS 16  
DS 2  
SWH 8278.146 Hz  
FIDRES 0.126314 Hz  
AQ 3.9584243 sec  
RG 143.7  
DW 60.400 use  
DE 6.00 use  
TE 299.2 K  
D1 1.00000000 sec  
MCREST 0.00000000 sec  
MCWRK 0.01500000 sec

==== CHANNEL f1 =====  
NUC1 1H  
P1 13.00 use  
PL1 0.00 dB  
SFO1 400.1324710 MHz

F2 - Processing parameters  
SI 32768  
SF 400.1300174 MHz  
WDW EM  
SSB 0  
LB 0.30 Hz  
GB 0  
PC 1.00

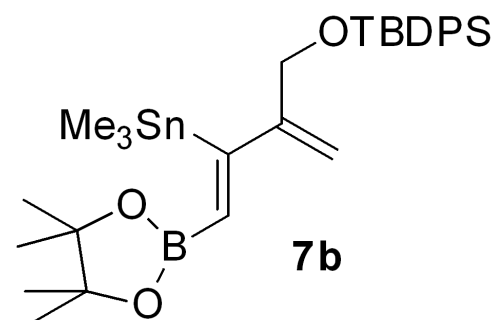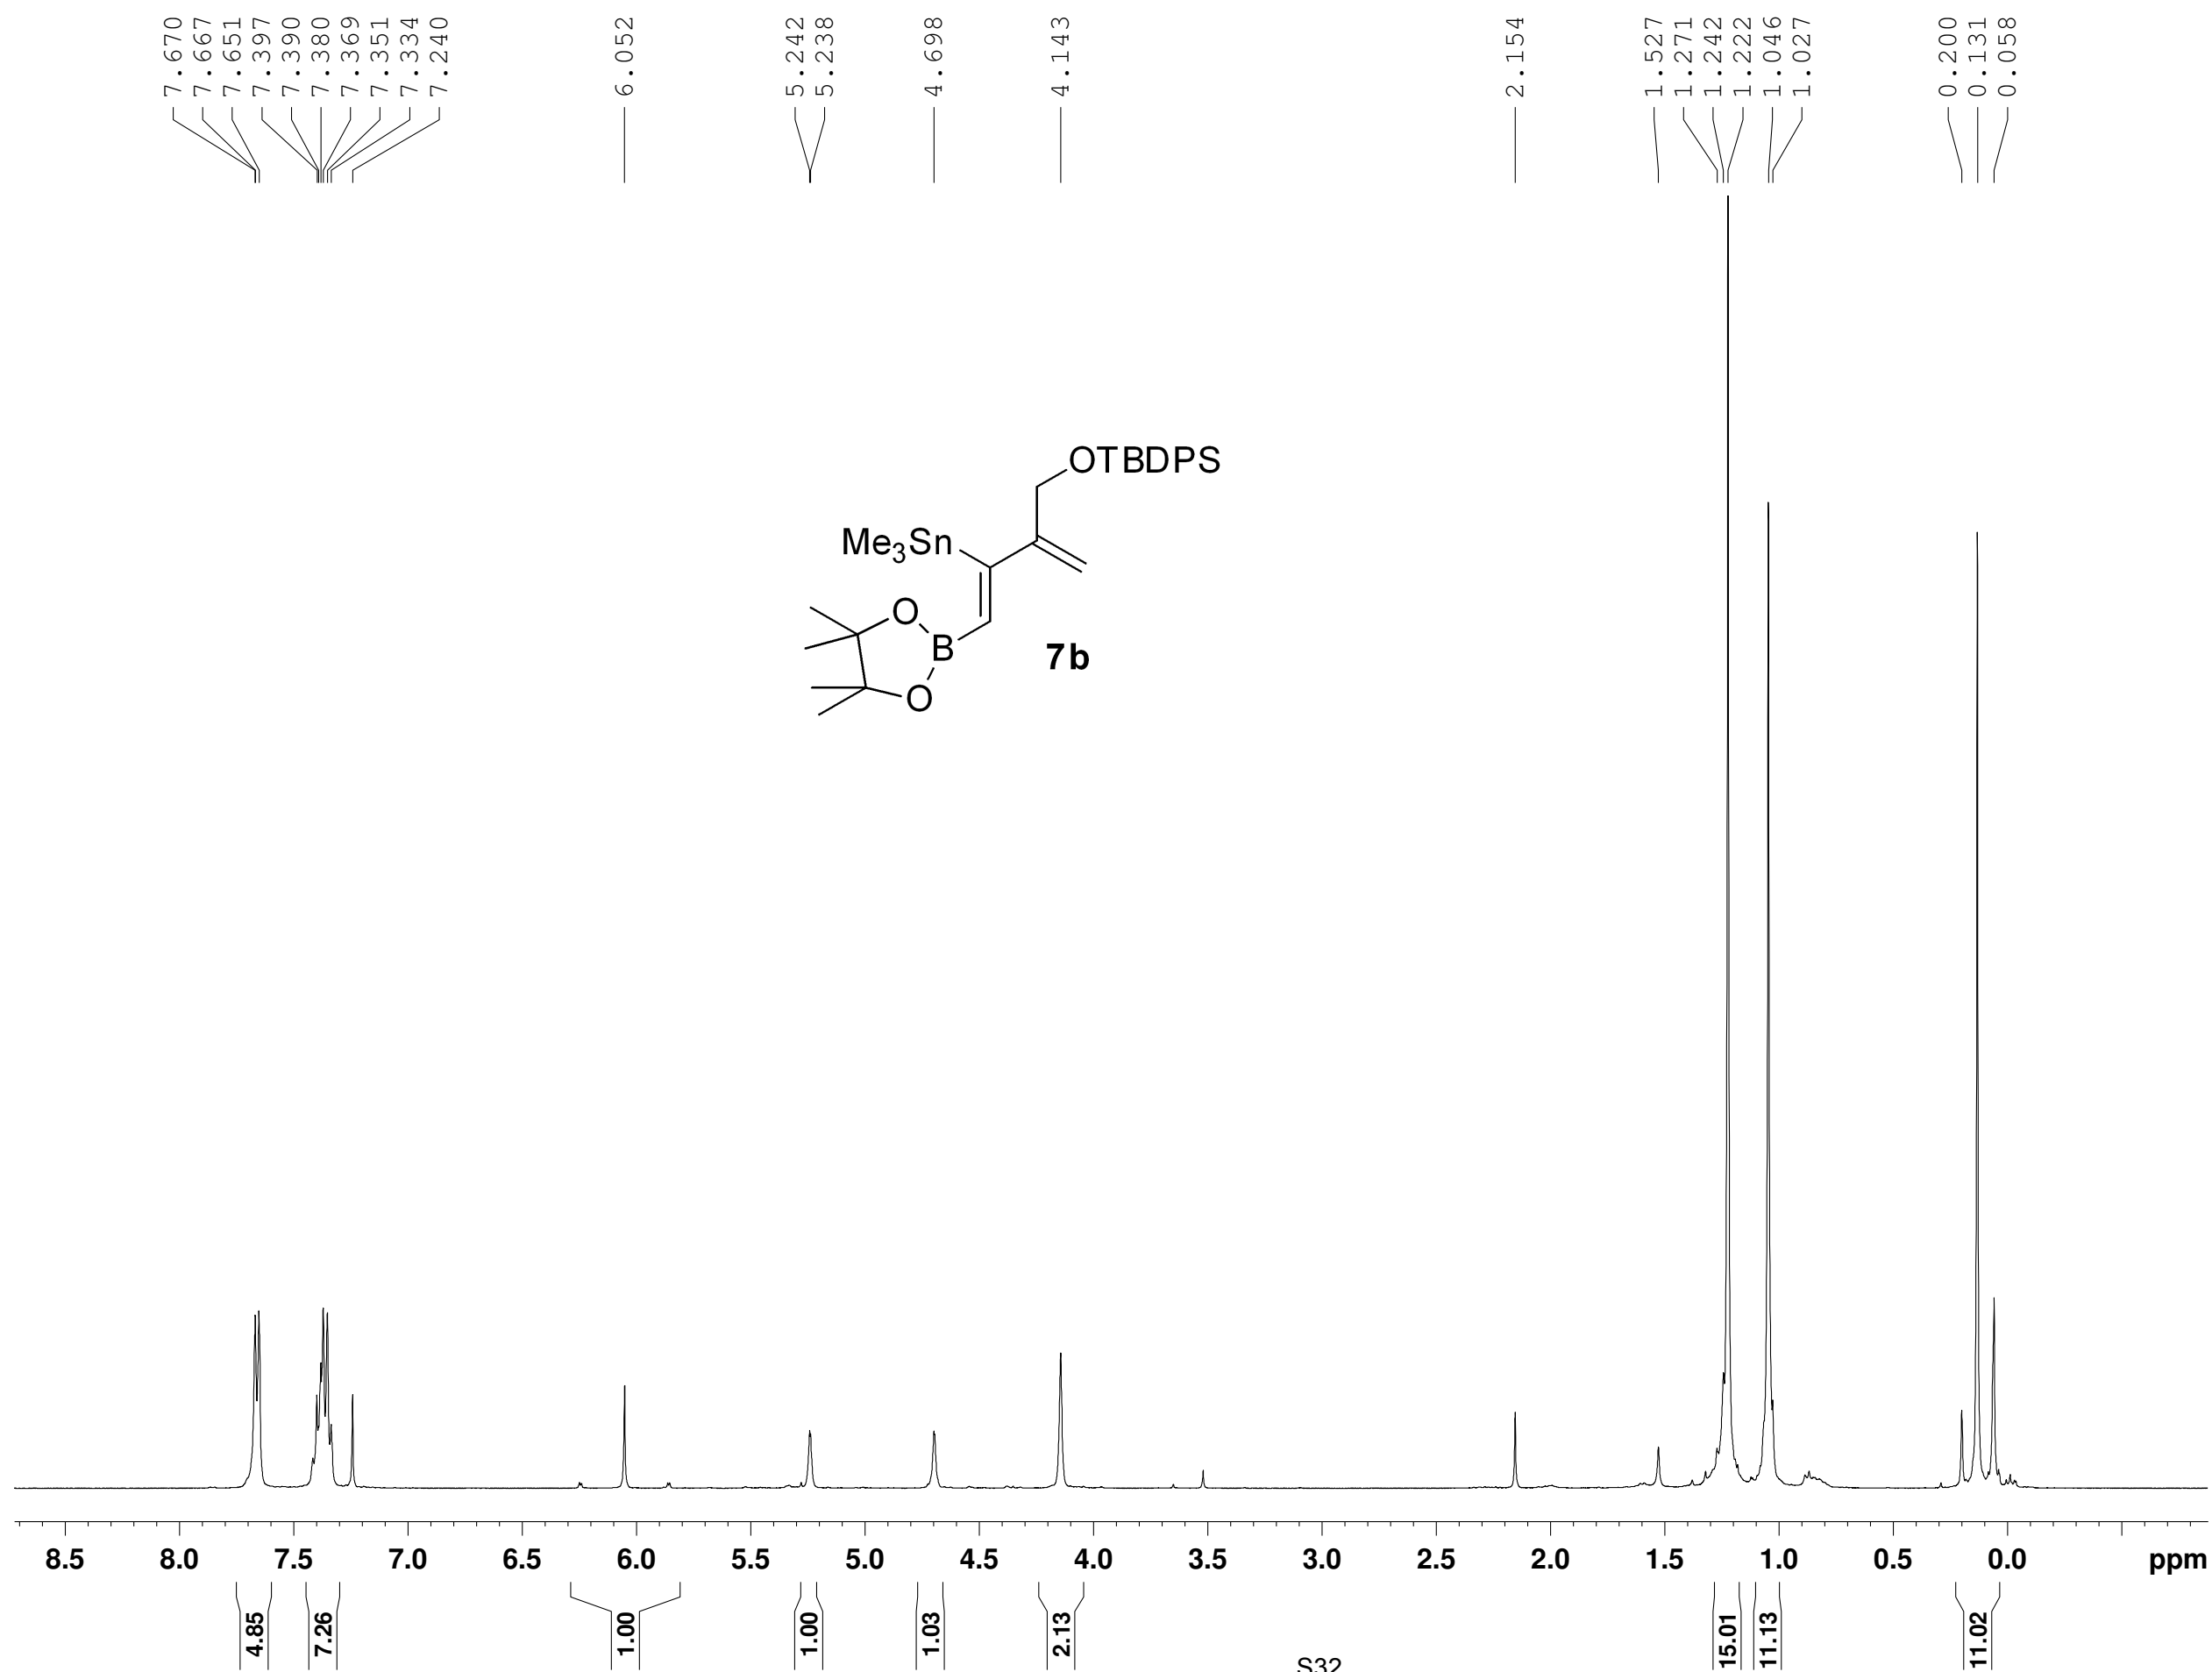



The Ohio State University  
 Department of Chemistry  
 NMR Facility  
 400MHz - 0083

Current Data Parameters  
 NAME Rs-3-248P  
 EXPNO 2  
 PROCNO 1

F2 - Acquisition Parameters  
 Date\_ 20090417  
 Time 13.49  
 INSTRUM spect  
 PROBHD 5 mm QNP 1H/13  
 PULPROG zgpg30  
 TD 65536  
 SOLVENT CDCl3  
 NS 428  
 DS 4  
 SWH 23980.814 Hz  
 FIDRES 0.365918 Hz  
 AQ 1.3664756 sec  
 RG 14596.5  
 DW 20.850 use  
 DE 6.00 use  
 TE 300.2 K  
 D1 2.00000000 sec  
 d11 0.03000000 sec  
 DELTA 1.89999998 sec  
 MCREST 0.00000000 sec  
 MCWRK 0.01500000 sec

==== CHANNEL f1 =====  
 NUC1 13C  
 P1 10.50 use  
 PL1 0.00 dB  
 SFO1 100.6228298 MHz

==== CHANNEL f2 =====  
 CPDPRG2 waltz16  
 NUC2 1H  
 PCPD2 80.00 use  
 PL2 -6.00 dB  
 PL12 14.56 dB  
 PL13 16.50 dB  
 SFO2 400.1316005 MHz

F2 - Processing parameters  
 SI 32768  
 SF 100.6127476 MHz  
 WDW EM  
 SSB 0  
 LB 1.00 Hz  
 GB 0  
 PC 1.40

174.5  
 154.5  
 135.7  
 133.8  
 129.8  
 127.8  
 107.7  
 83.59  
 77.53  
 77.22  
 76.90  
 65.25  
 29.91  
 27.04  
 25.00  
 19.53  
 1.234

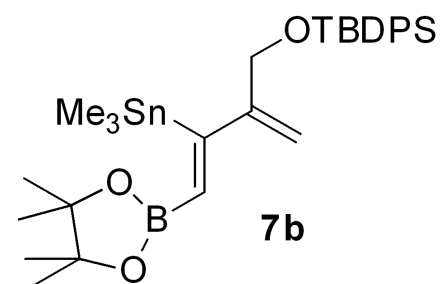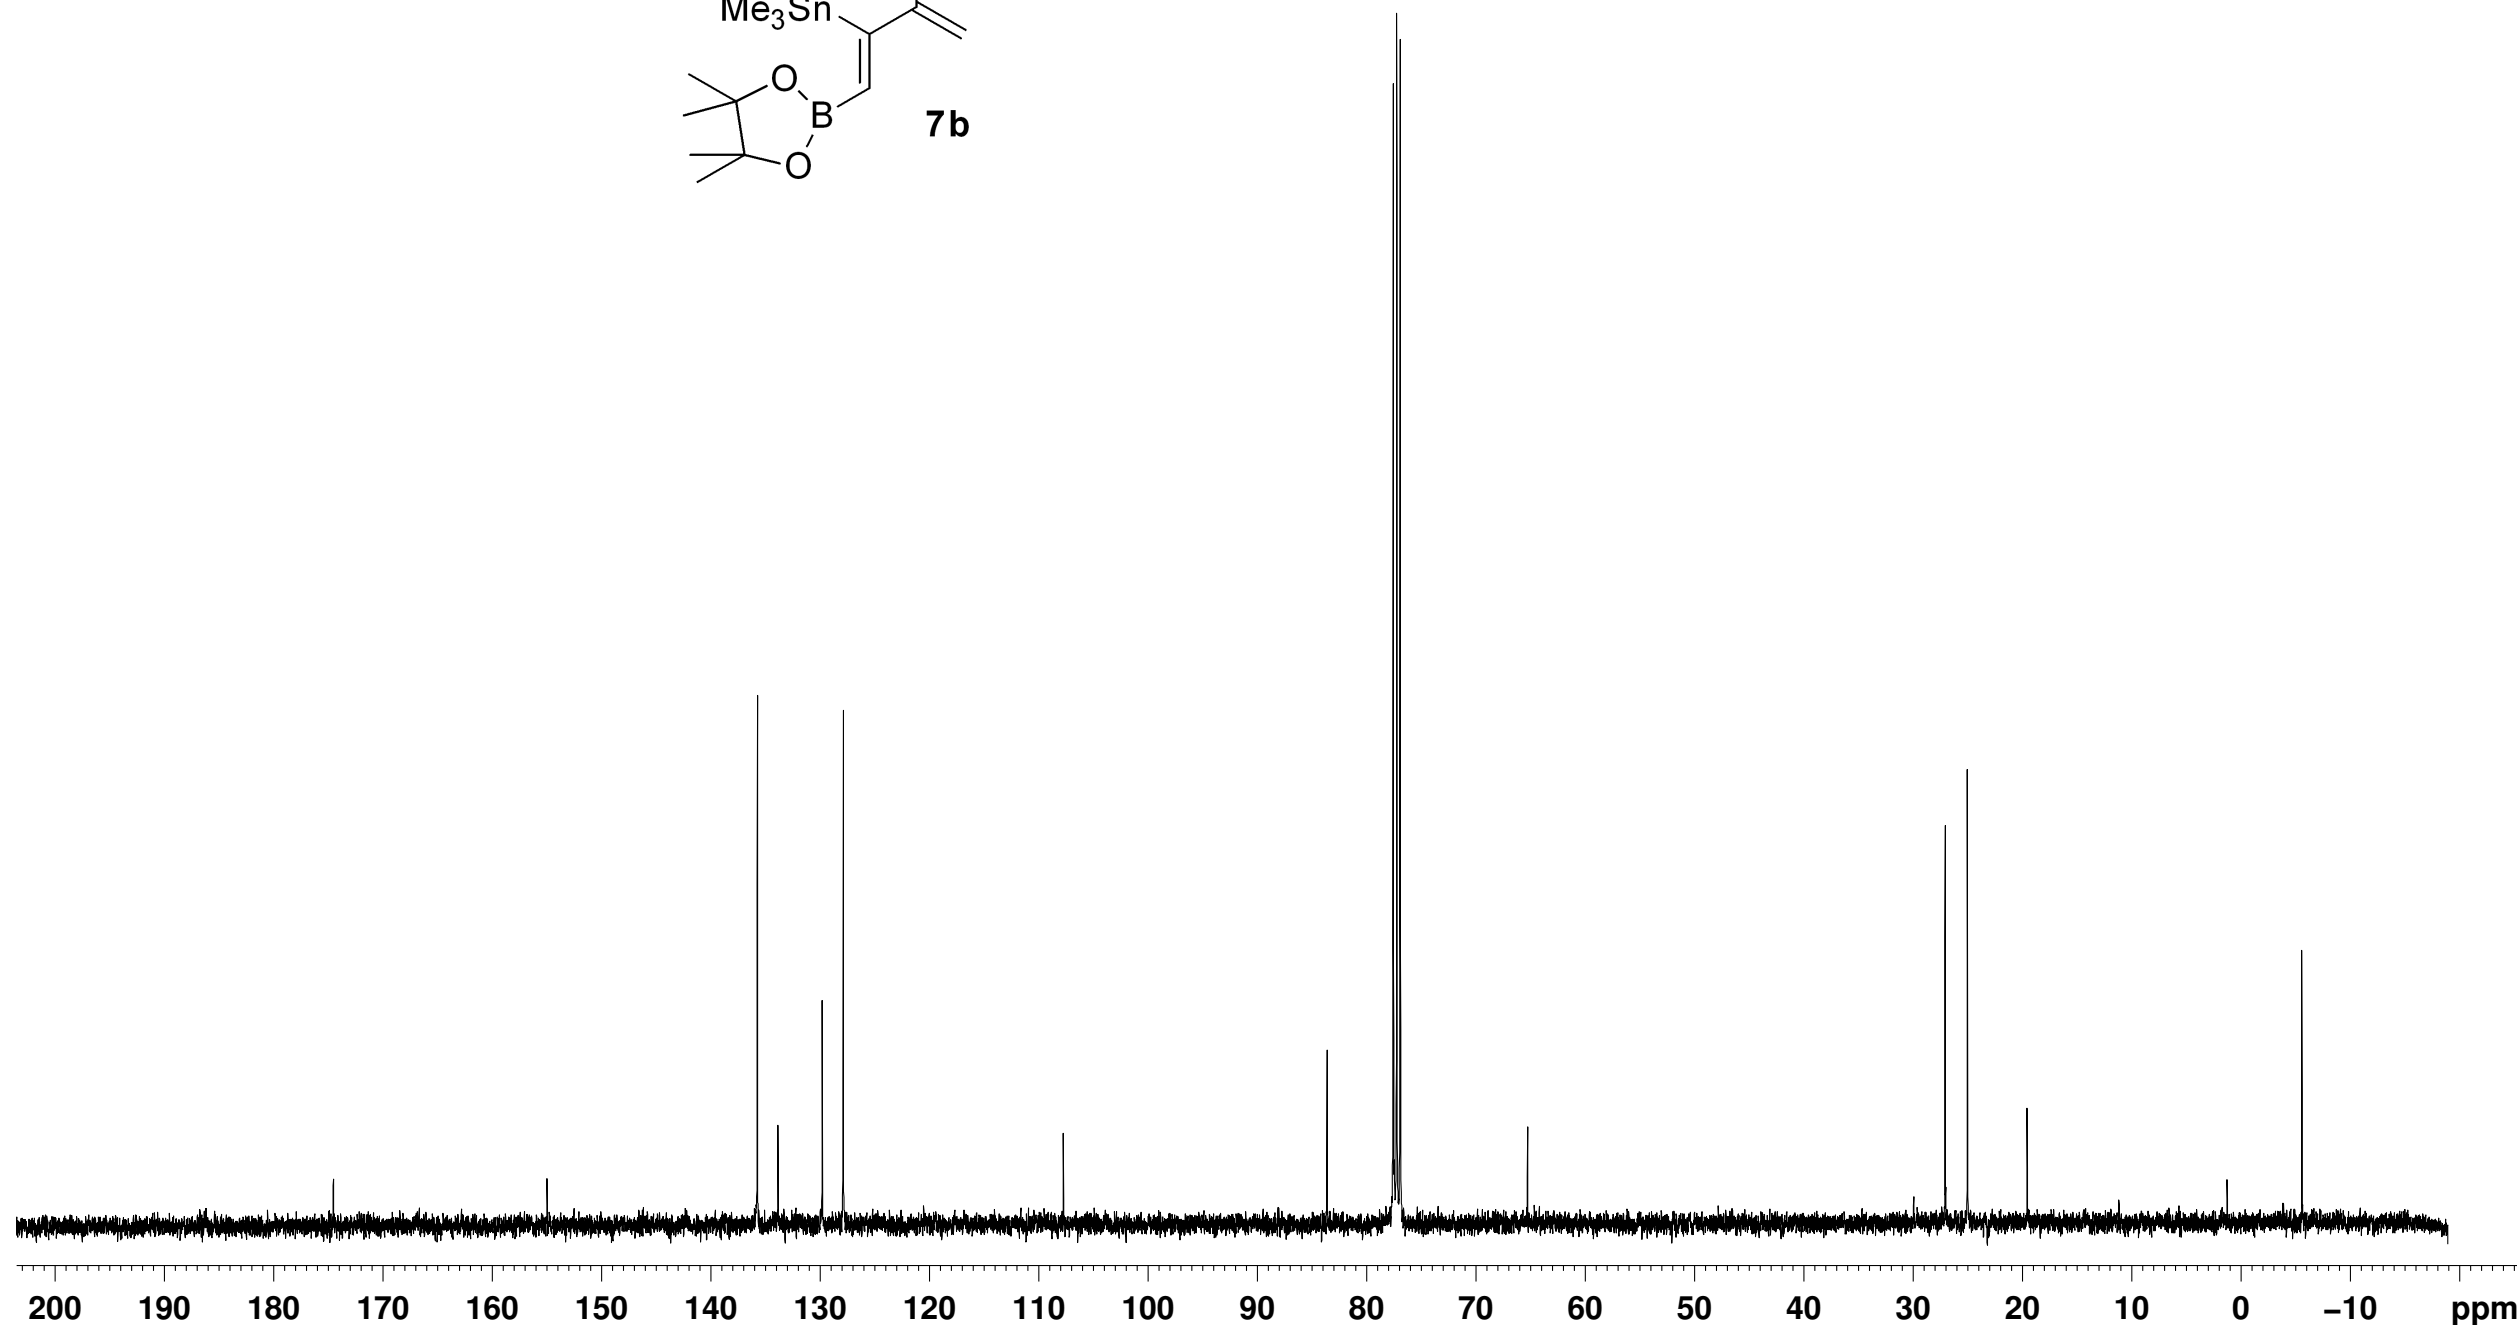

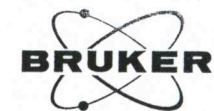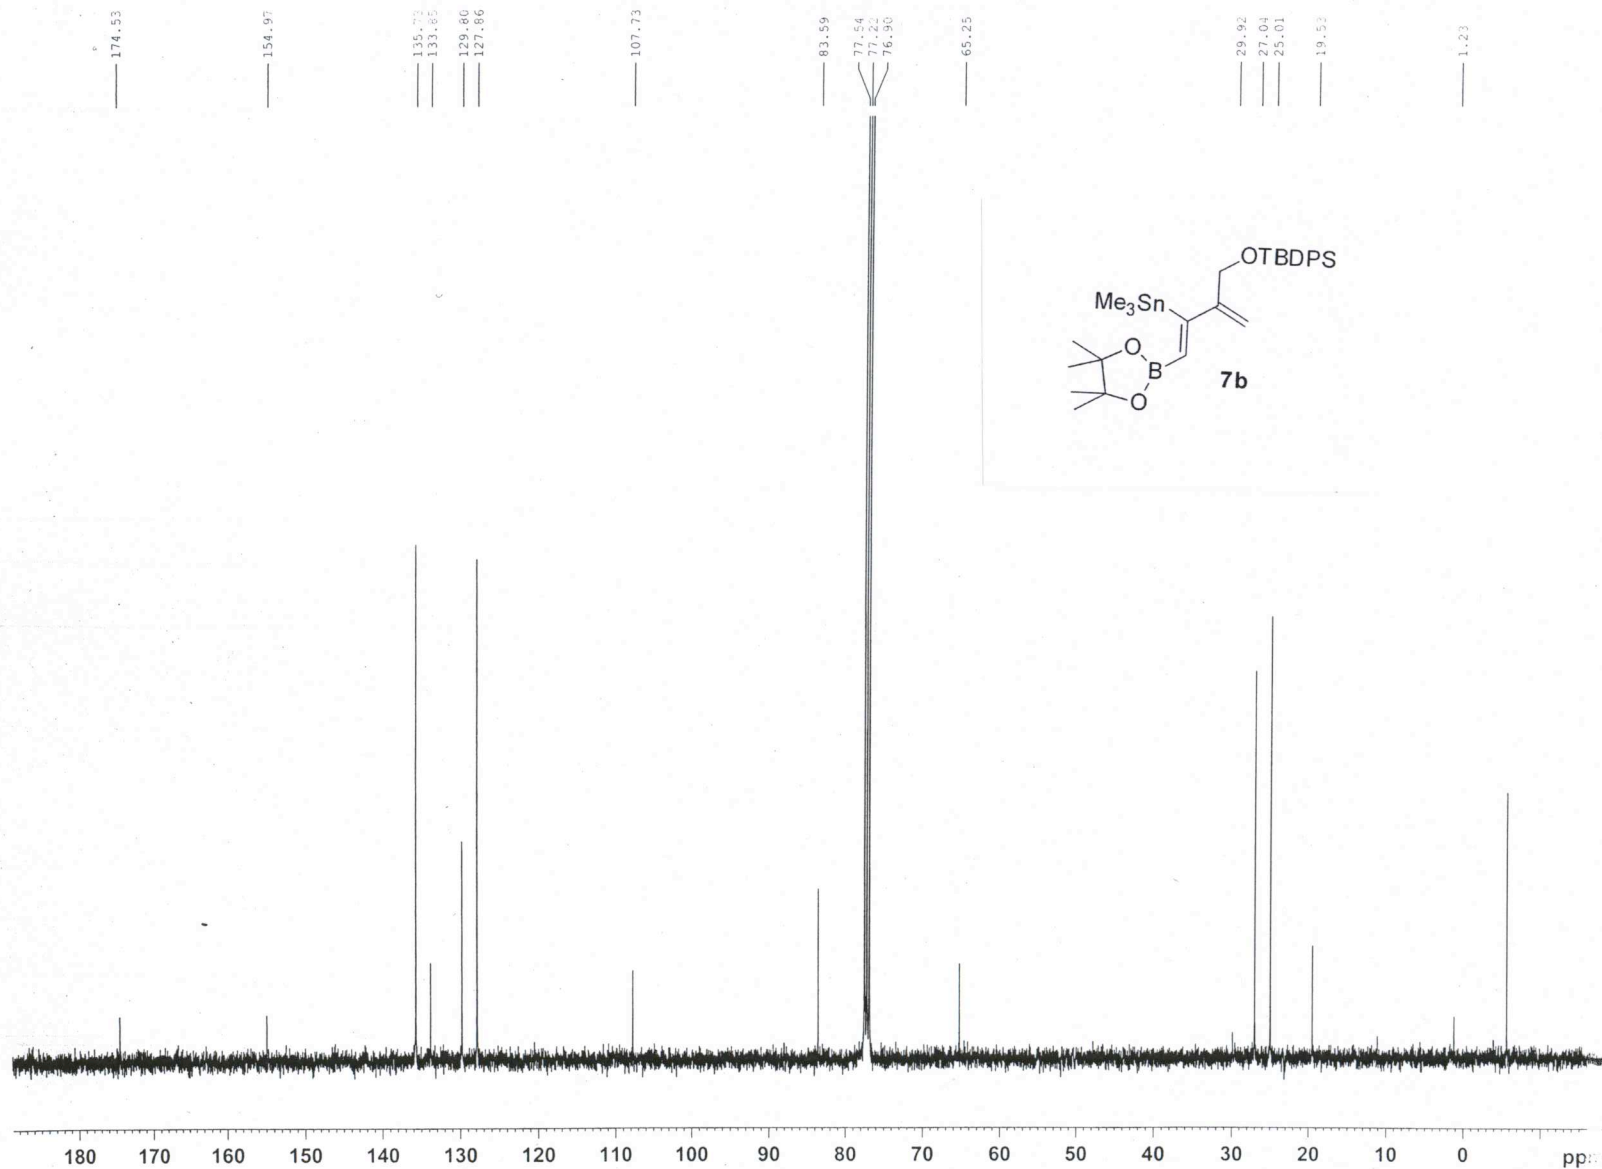

Current Data Parameters  
NAME Rs-3-248P  
EXPNO 2  
PROCNO 1

F2 - Acquisition Parameters  
Date\_ 20090417  
Time\_ 13.49  
INSTRUM spect  
PROBHD 5 mm QNP 1H/13  
PULPROG zgpg30  
TD 65536  
SOLVENT CDC13  
NS 428  
DS 4  
SWH 23980.814 Hz  
FIDRES 0.365918 Hz  
AQ 1.3664756 sec  
RG 14596.5  
DW 20.850 usec  
DE 6.00 usec  
TE 300.2 K  
D1 2.00000000 sec  
d11 0.03000000 sec  
DELTA 1.89999998 sec  
MCREST 0.00000000 sec  
MCWRK 0.01500000 sec

===== CHANNEL f1 =====  
NUC1 13C  
P1 10.50 usec  
PL1 0.00 dB  
SFO1 100.6228298 MHz

===== CHANNEL f2 =====  
CPDPRG2 waltz16  
NUC2 1H  
PCPD2 80.00 usec  
PL2 -6.00 dB  
PL12 14.56 dB  
PL13 16.50 dB  
SFO2 400.1316005 MHz

F2 - Processing parameters  
SI 32768  
SF 100.6127483 MHz  
WDW EM  
SSB 0  
GB 0  
LB 1.00 Hz  
CB 0  
SC 1.40

The Ohio State University  
Department of Chemistry  
NMR Facility  
400MHz - 0083

Current Data Parameters  
NAME Rs-3-261P  
EXPNO 1  
PROCNO 1

F2 - Acquisition Parameters  
Date\_ 20090429  
Time 14.37  
INSTRUM spect  
PROBHD 5 mm QNP 1H/13  
PULPROG zg30  
TD 65536  
SOLVENT CDCl3  
NS 16  
DS 2  
SWH 8278.146 Hz  
FIDRES 0.126314 Hz  
AQ 3.9584243 sec  
RG 80.6  
DW 60.400 use  
DE 6.00 use  
TE 299.2 K  
D1 1.00000000 sec  
MCREST 0.00000000 sec  
MCWRK 0.01500000 sec

==== CHANNEL f1 =====  
NUC1 1H  
P1 13.00 use  
PL1 0.00 dB  
SFO1 400.1324710 MHz

F2 - Processing parameters  
SI 32768  
SF 400.1300174 MHz  
WDW EM  
SSB 0  
LB 0.30 Hz  
GB 0  
PC 1.00

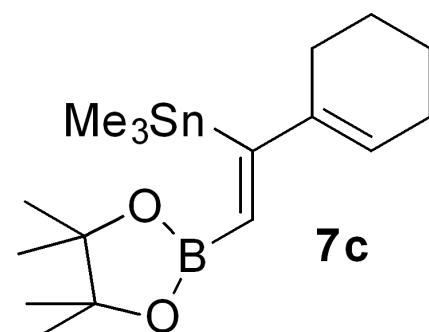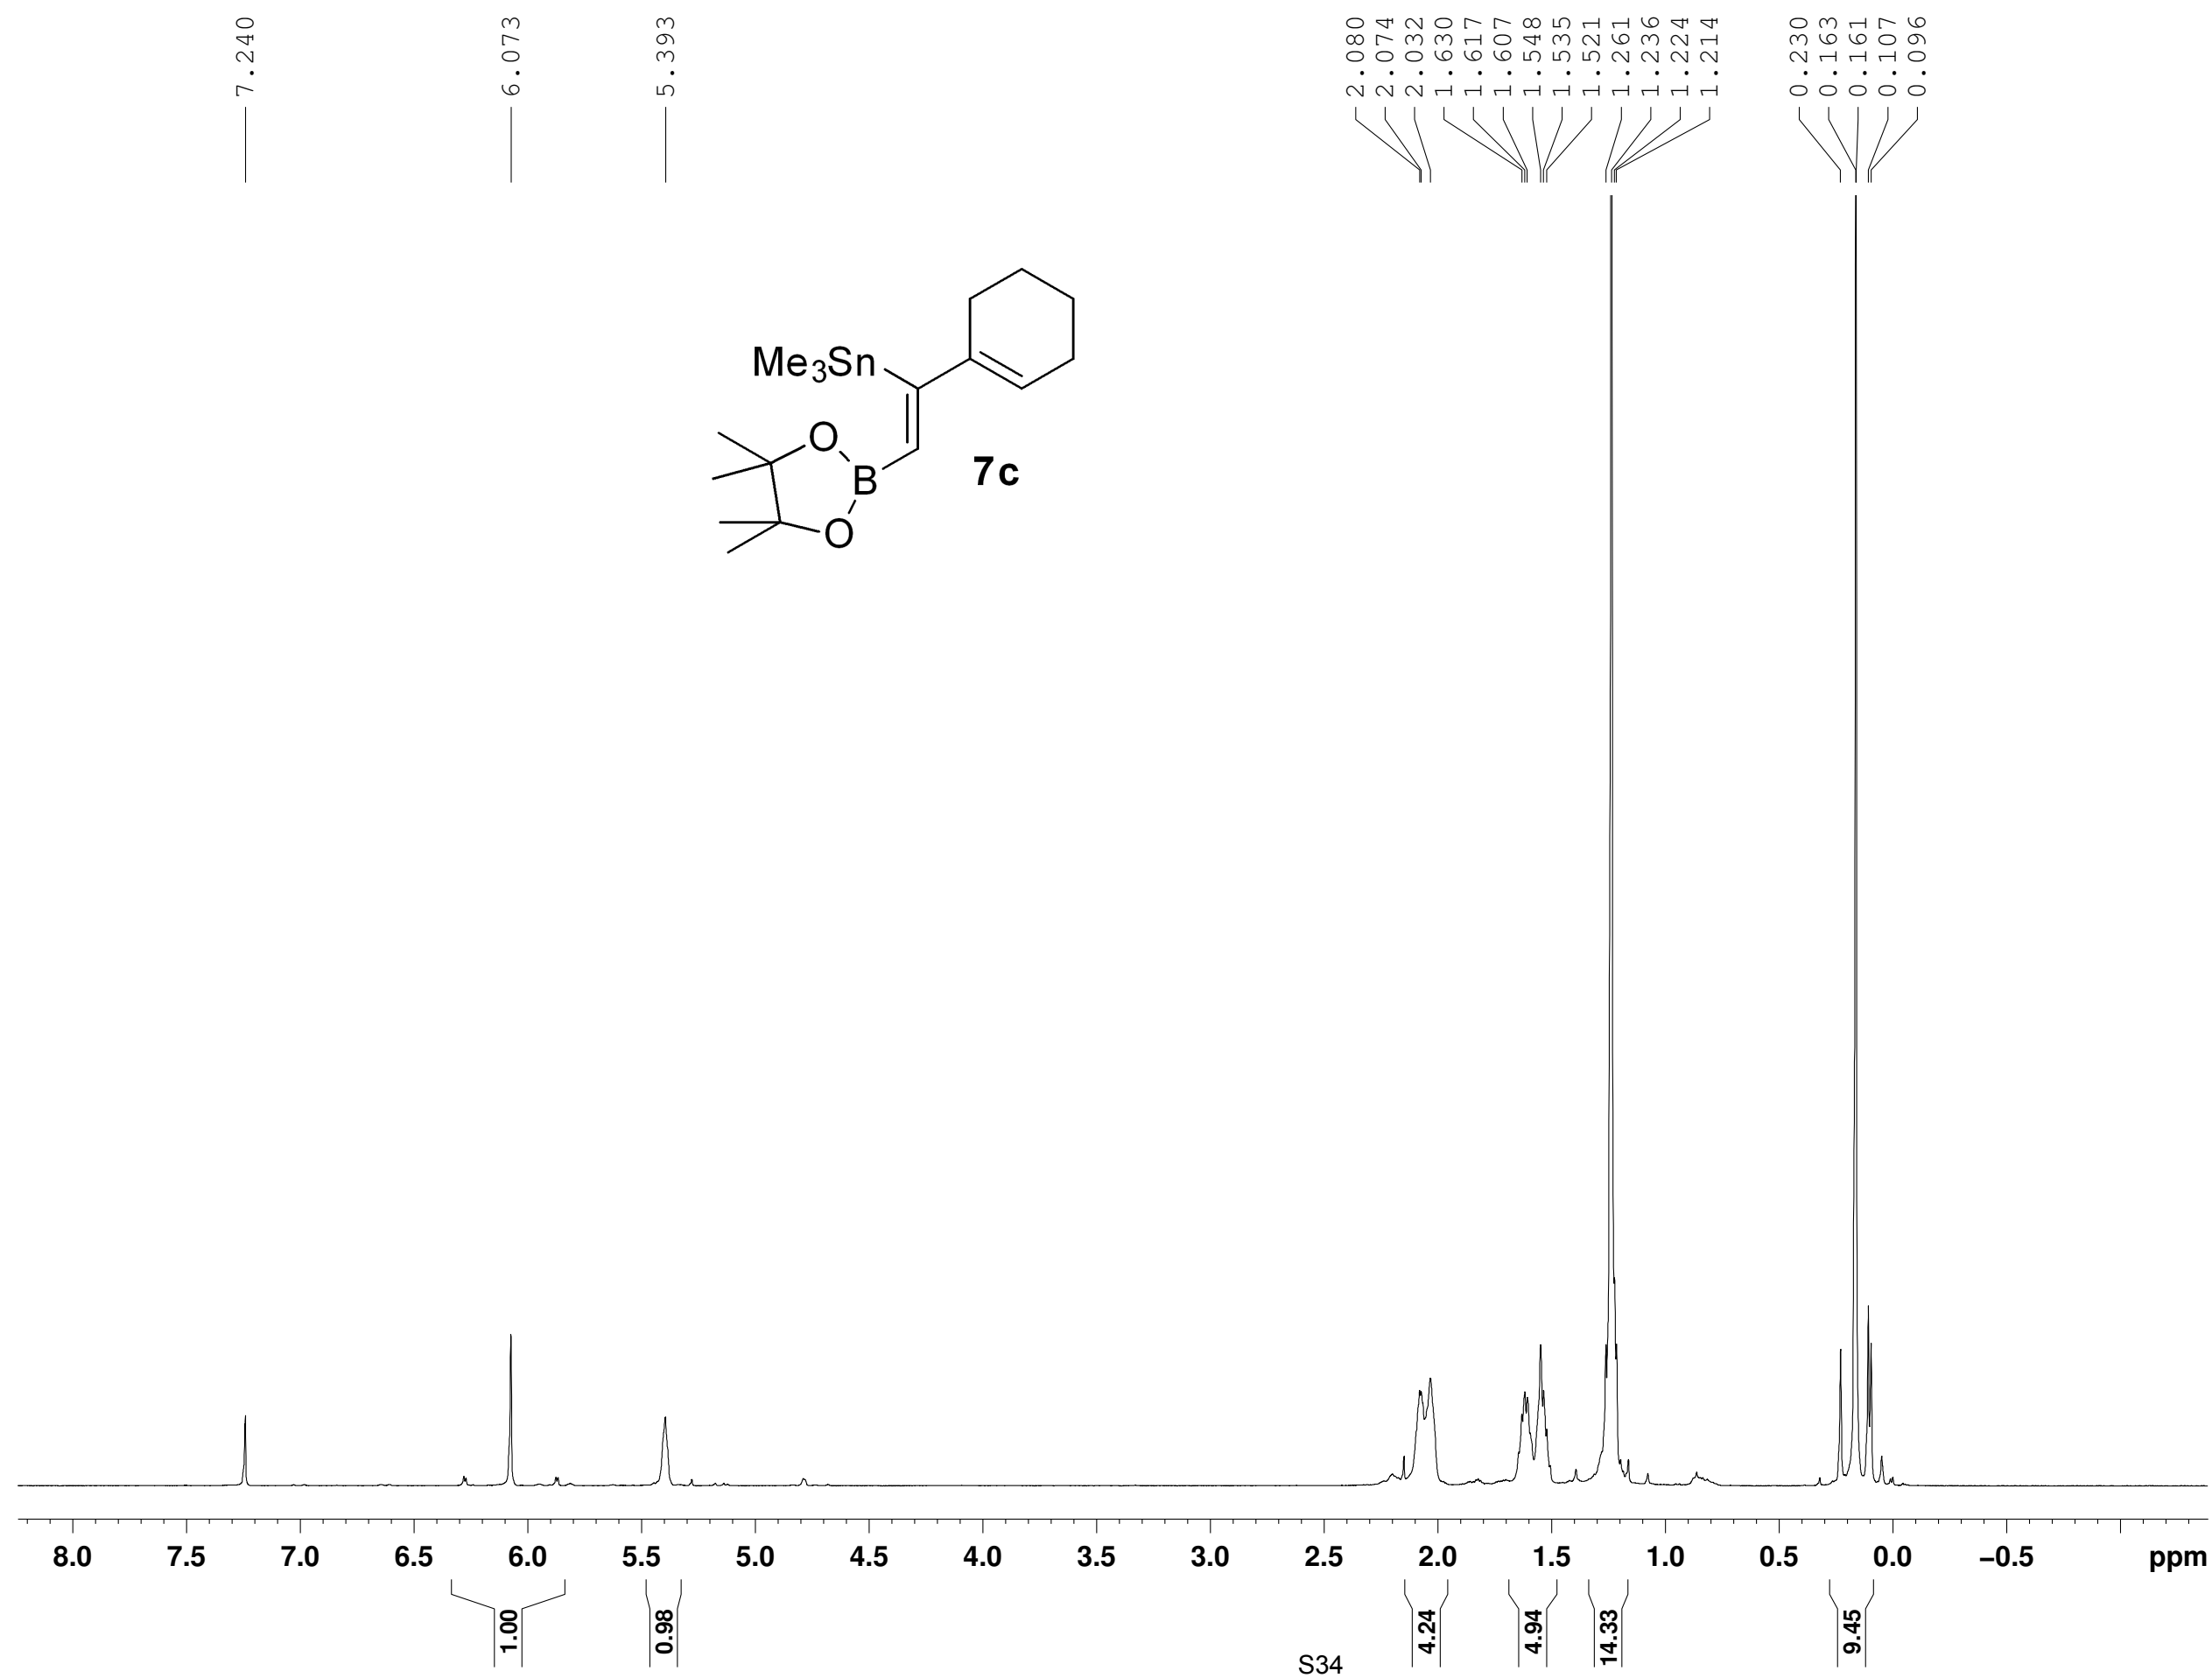

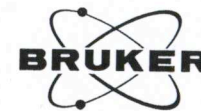

Current Data Parameters  
NAME Rs-3-261P  
EXPNO 2  
PROCNO 1

F2 - Acquisition Parameters  
Date\_ 20090429  
Time 14.40  
INSTRUM spect  
PROBHD 5 mm QNP 1H/13  
PULPROG zgpg30  
TD 65536  
SOLVENT CDCl3  
NS 210  
DS 4  
SWH 23980.814 Hz  
FIDRES 0.365918 Hz  
AQ 1.3664756 sec  
RG 5160.6  
DW 20.850 usec  
DE 6.00 usec  
TE 300.2 K  
D1 2.00000000 sec  
d11 0.03000000 sec  
DELTA 1.89999998 sec  
MCREST 0.00000000 sec  
MCWRK 0.01500000 sec

===== CHANNEL f1 =====  
NUC1 13C  
P1 10.50 usec  
PL1 0.00 dB  
SF01 100.6228298 MHz

===== CHANNEL f2 =====  
CPDPRG2 waltz16  
NUC2 1H  
PCPD2 80.00 usec  
PL2 -6.00 dB  
PL12 14.56 dB  
PL13 16.50 dB  
SFO2 400.1316005 MHz

F2 - Processing parameters  
SI 32768  
SF 100.6127469 MHz  
WDW EM  
SSB 0  
LB 1.00 Hz  
GB 0  
PC 1.00

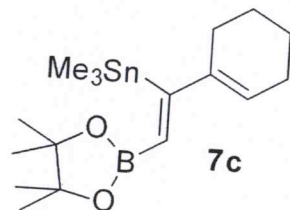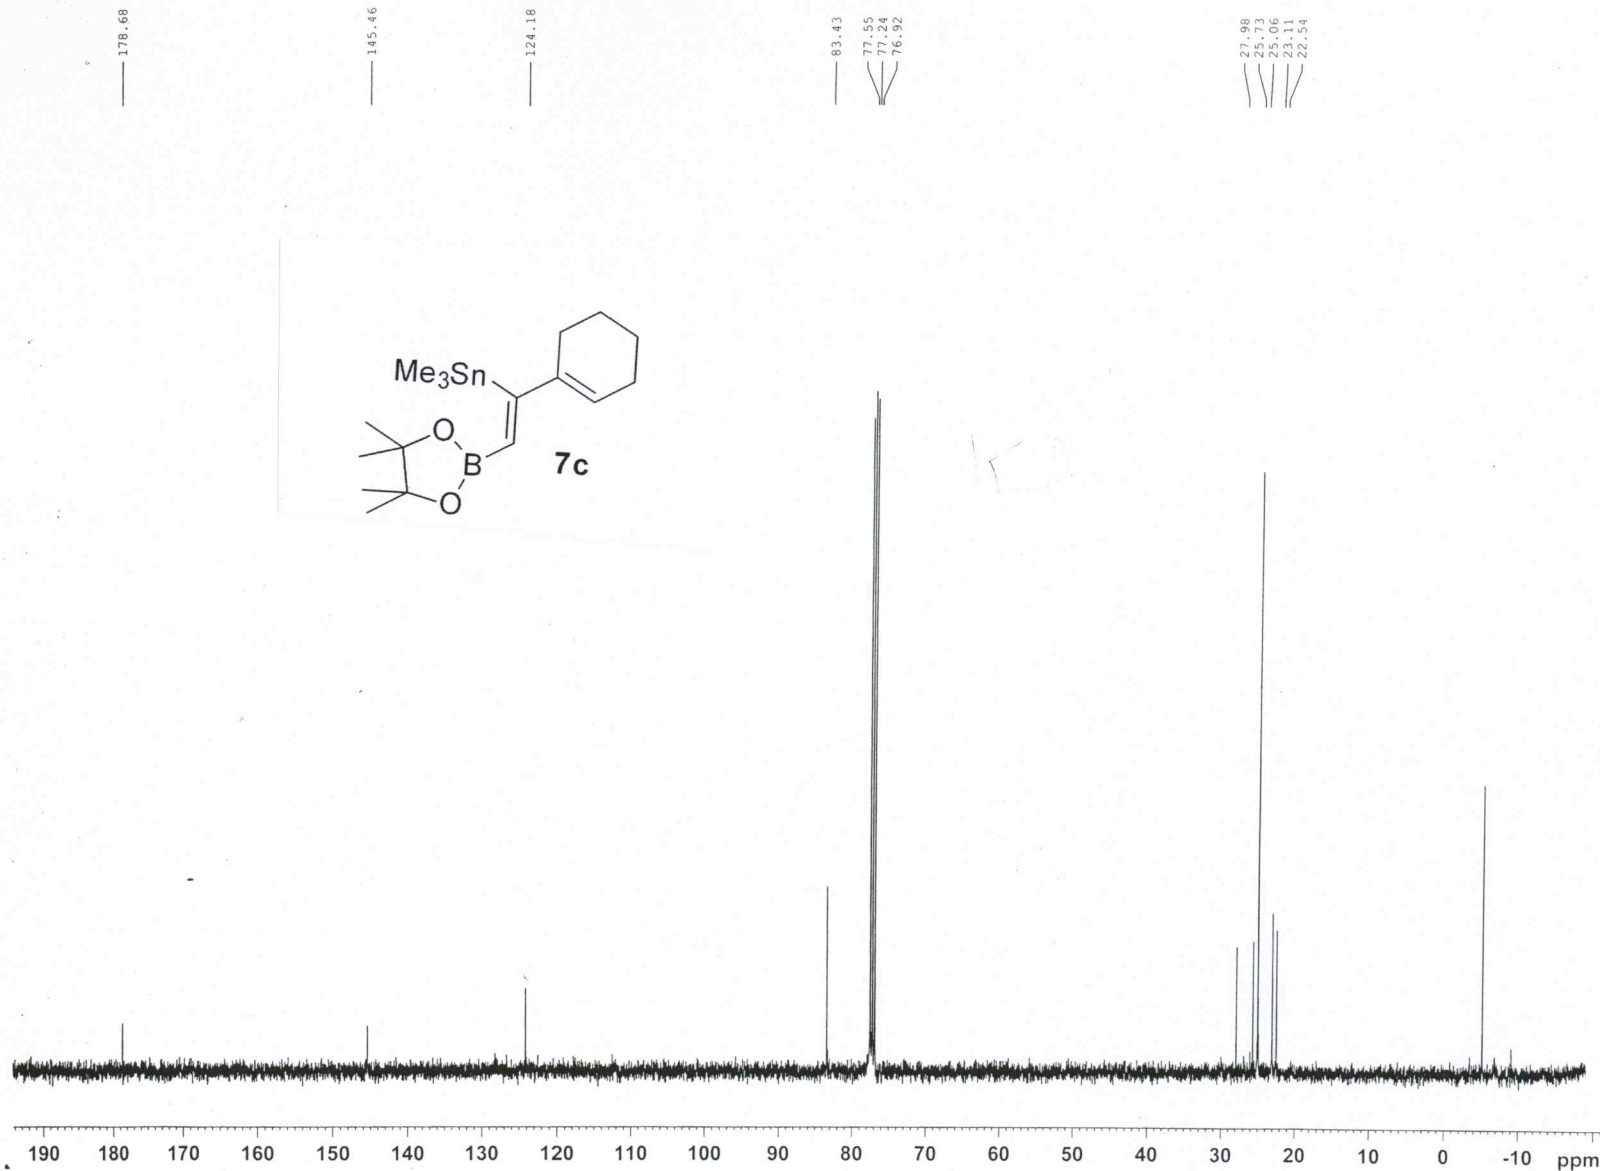

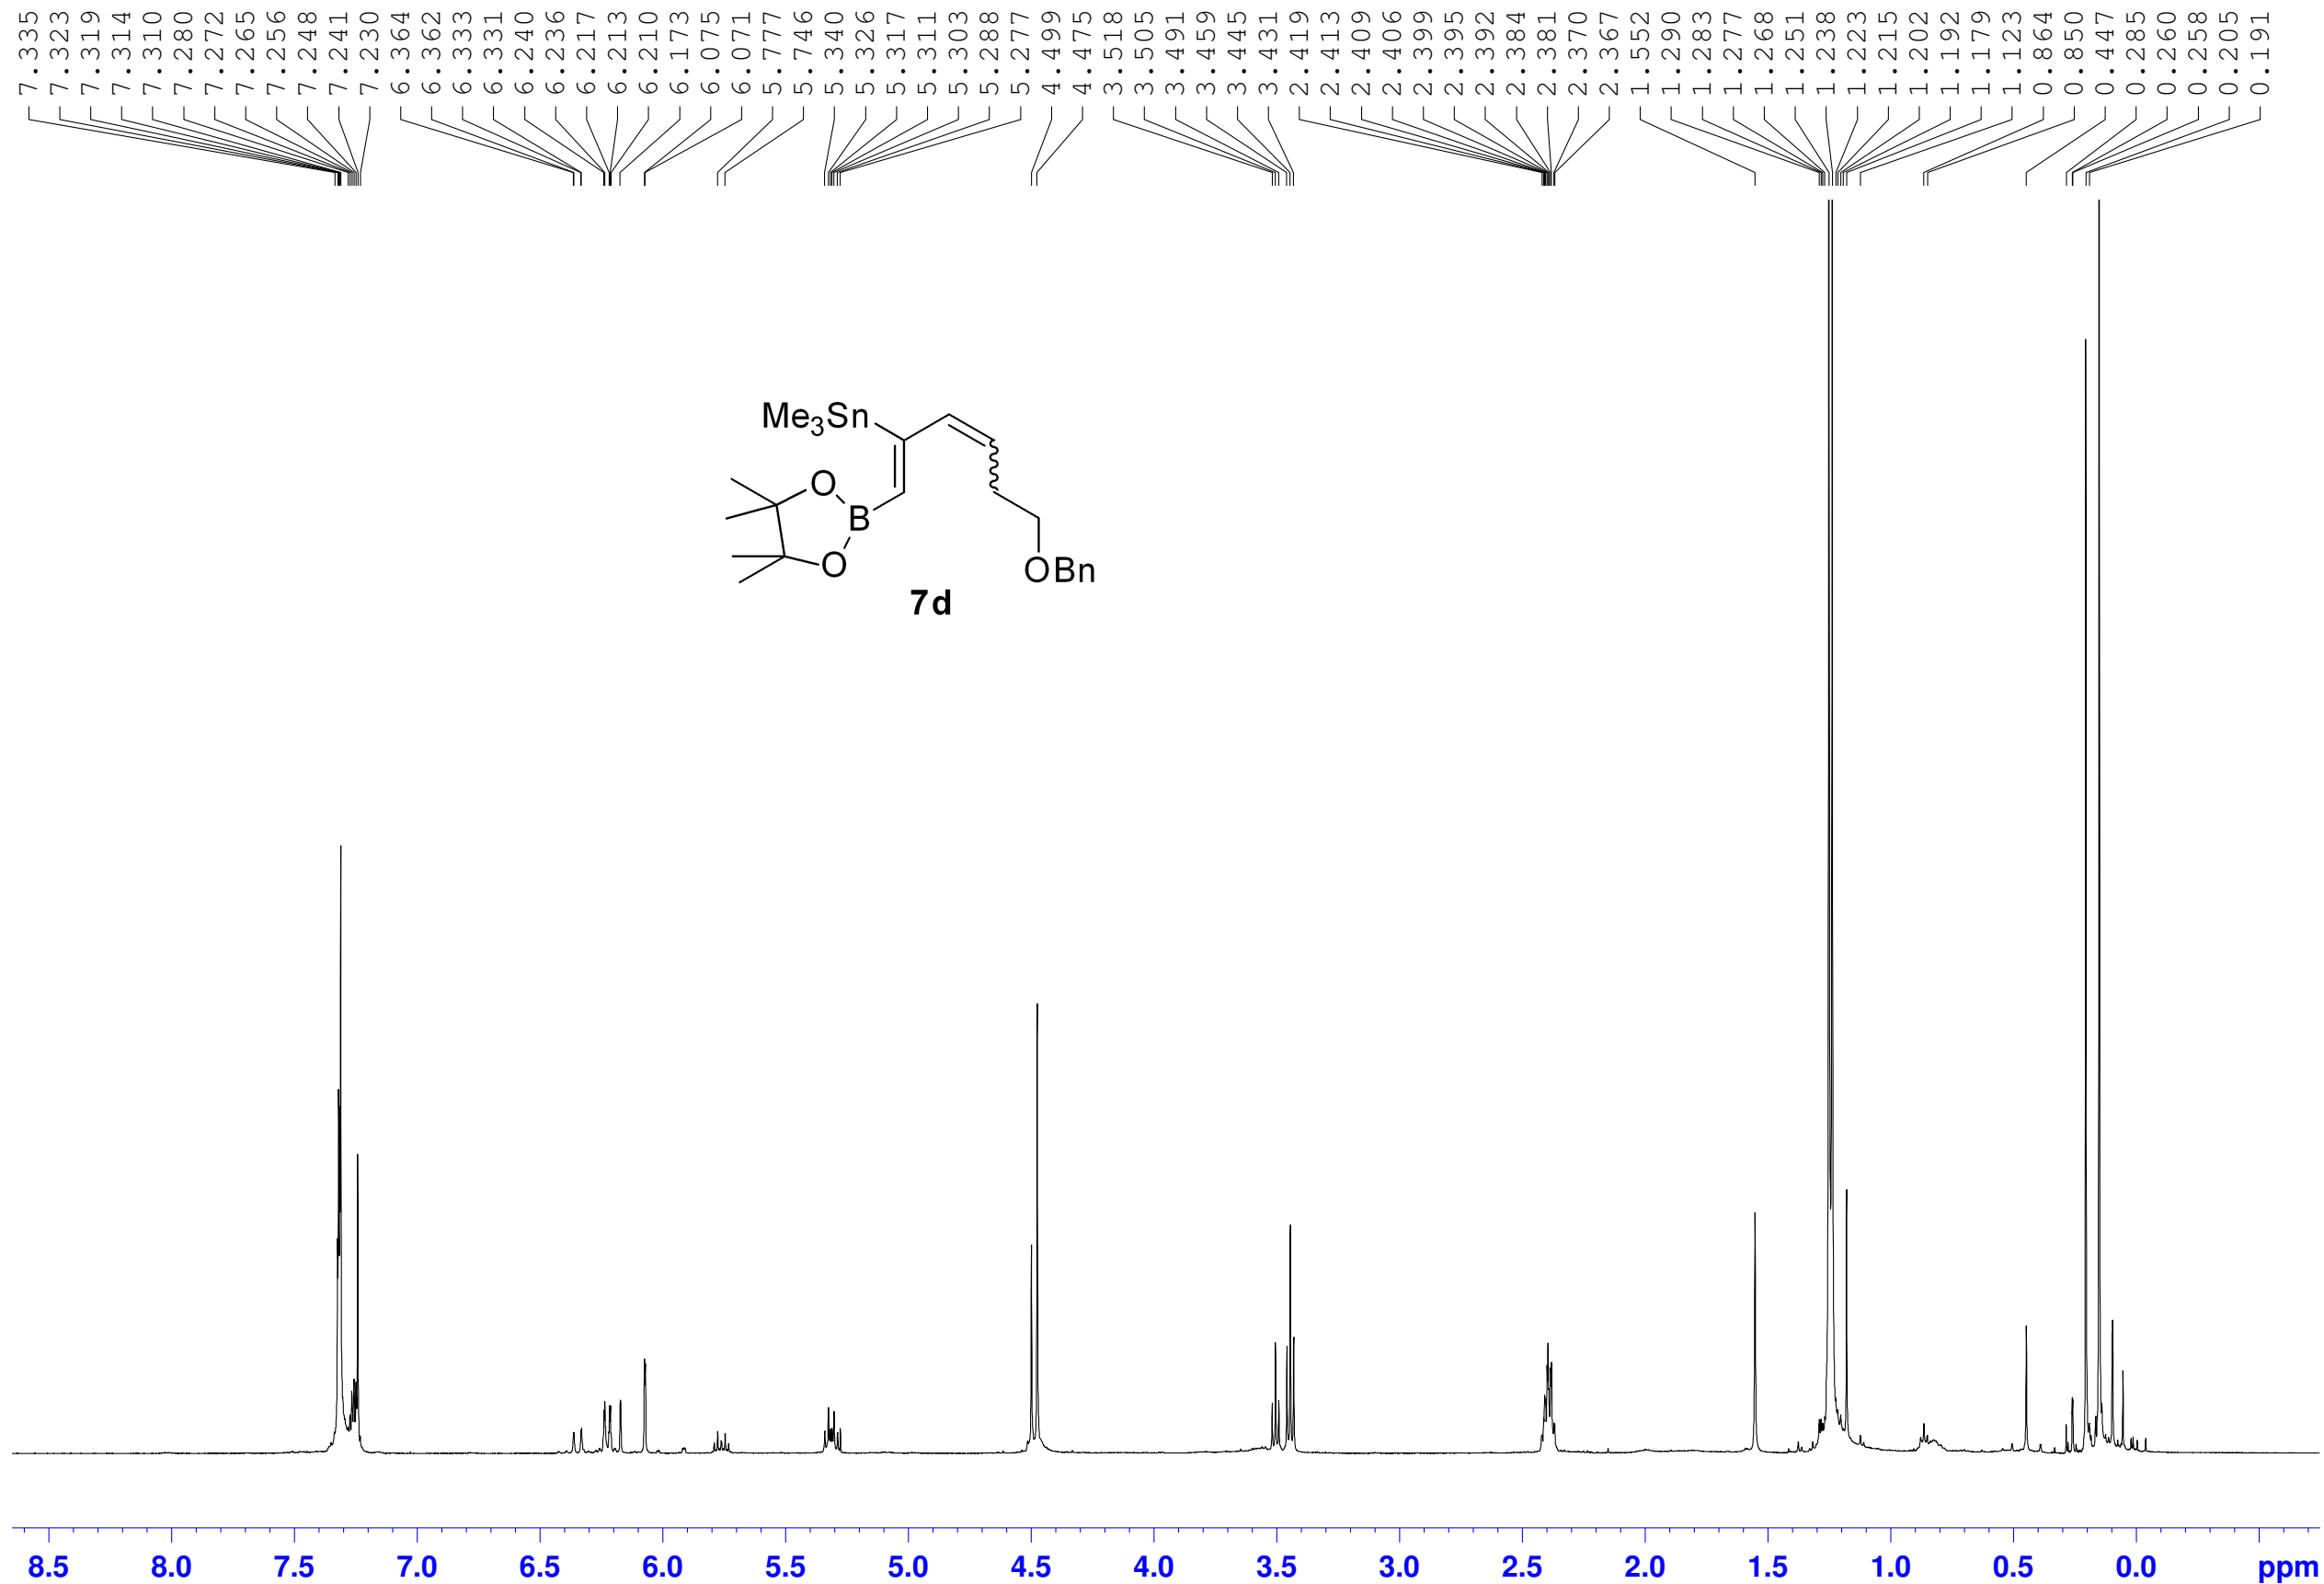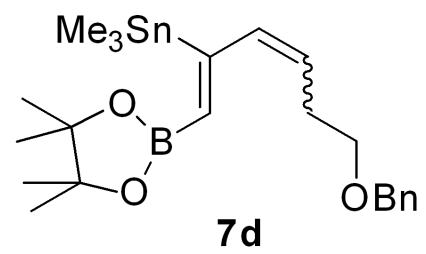

Current Data Parameters  
 NAME Rs-3-249  
 EXPNO 3  
 PROCNO 1

F2 - Acquisition Parameters  
 Date\_ 20100401  
 Time 11.21  
 INSTRUM spect  
 PROBHD 5 mm Multinucl  
 PULPROG zg30  
 TD 65536  
 SOLVENT CDCl3  
 NS 16  
 DS 2  
 SWH 10330.578 Hz  
 FIDRES 0.157632 Hz  
 AQ 3.1719923 sec  
 RG 256  
 DW 48.400 usec  
 DE 6.00 usec  
 TE 300.2 K  
 D1 1.00000000 sec  
 MCREST 0.00000000 sec  
 MCWRK 0.01500000 sec

==== CHANNEL f1 =====  
 NUC1 1H  
 P1 14.80 usec  
 PL1 -1.00 dB  
 SFO1 500.0230878 MHz

F2 - Processing parameters  
 SI 32768  
 SF 500.0200213 MHz  
 WDW EM  
 SSB 0  
 LB 0.30 Hz  
 GB 0  
 PC 1.00

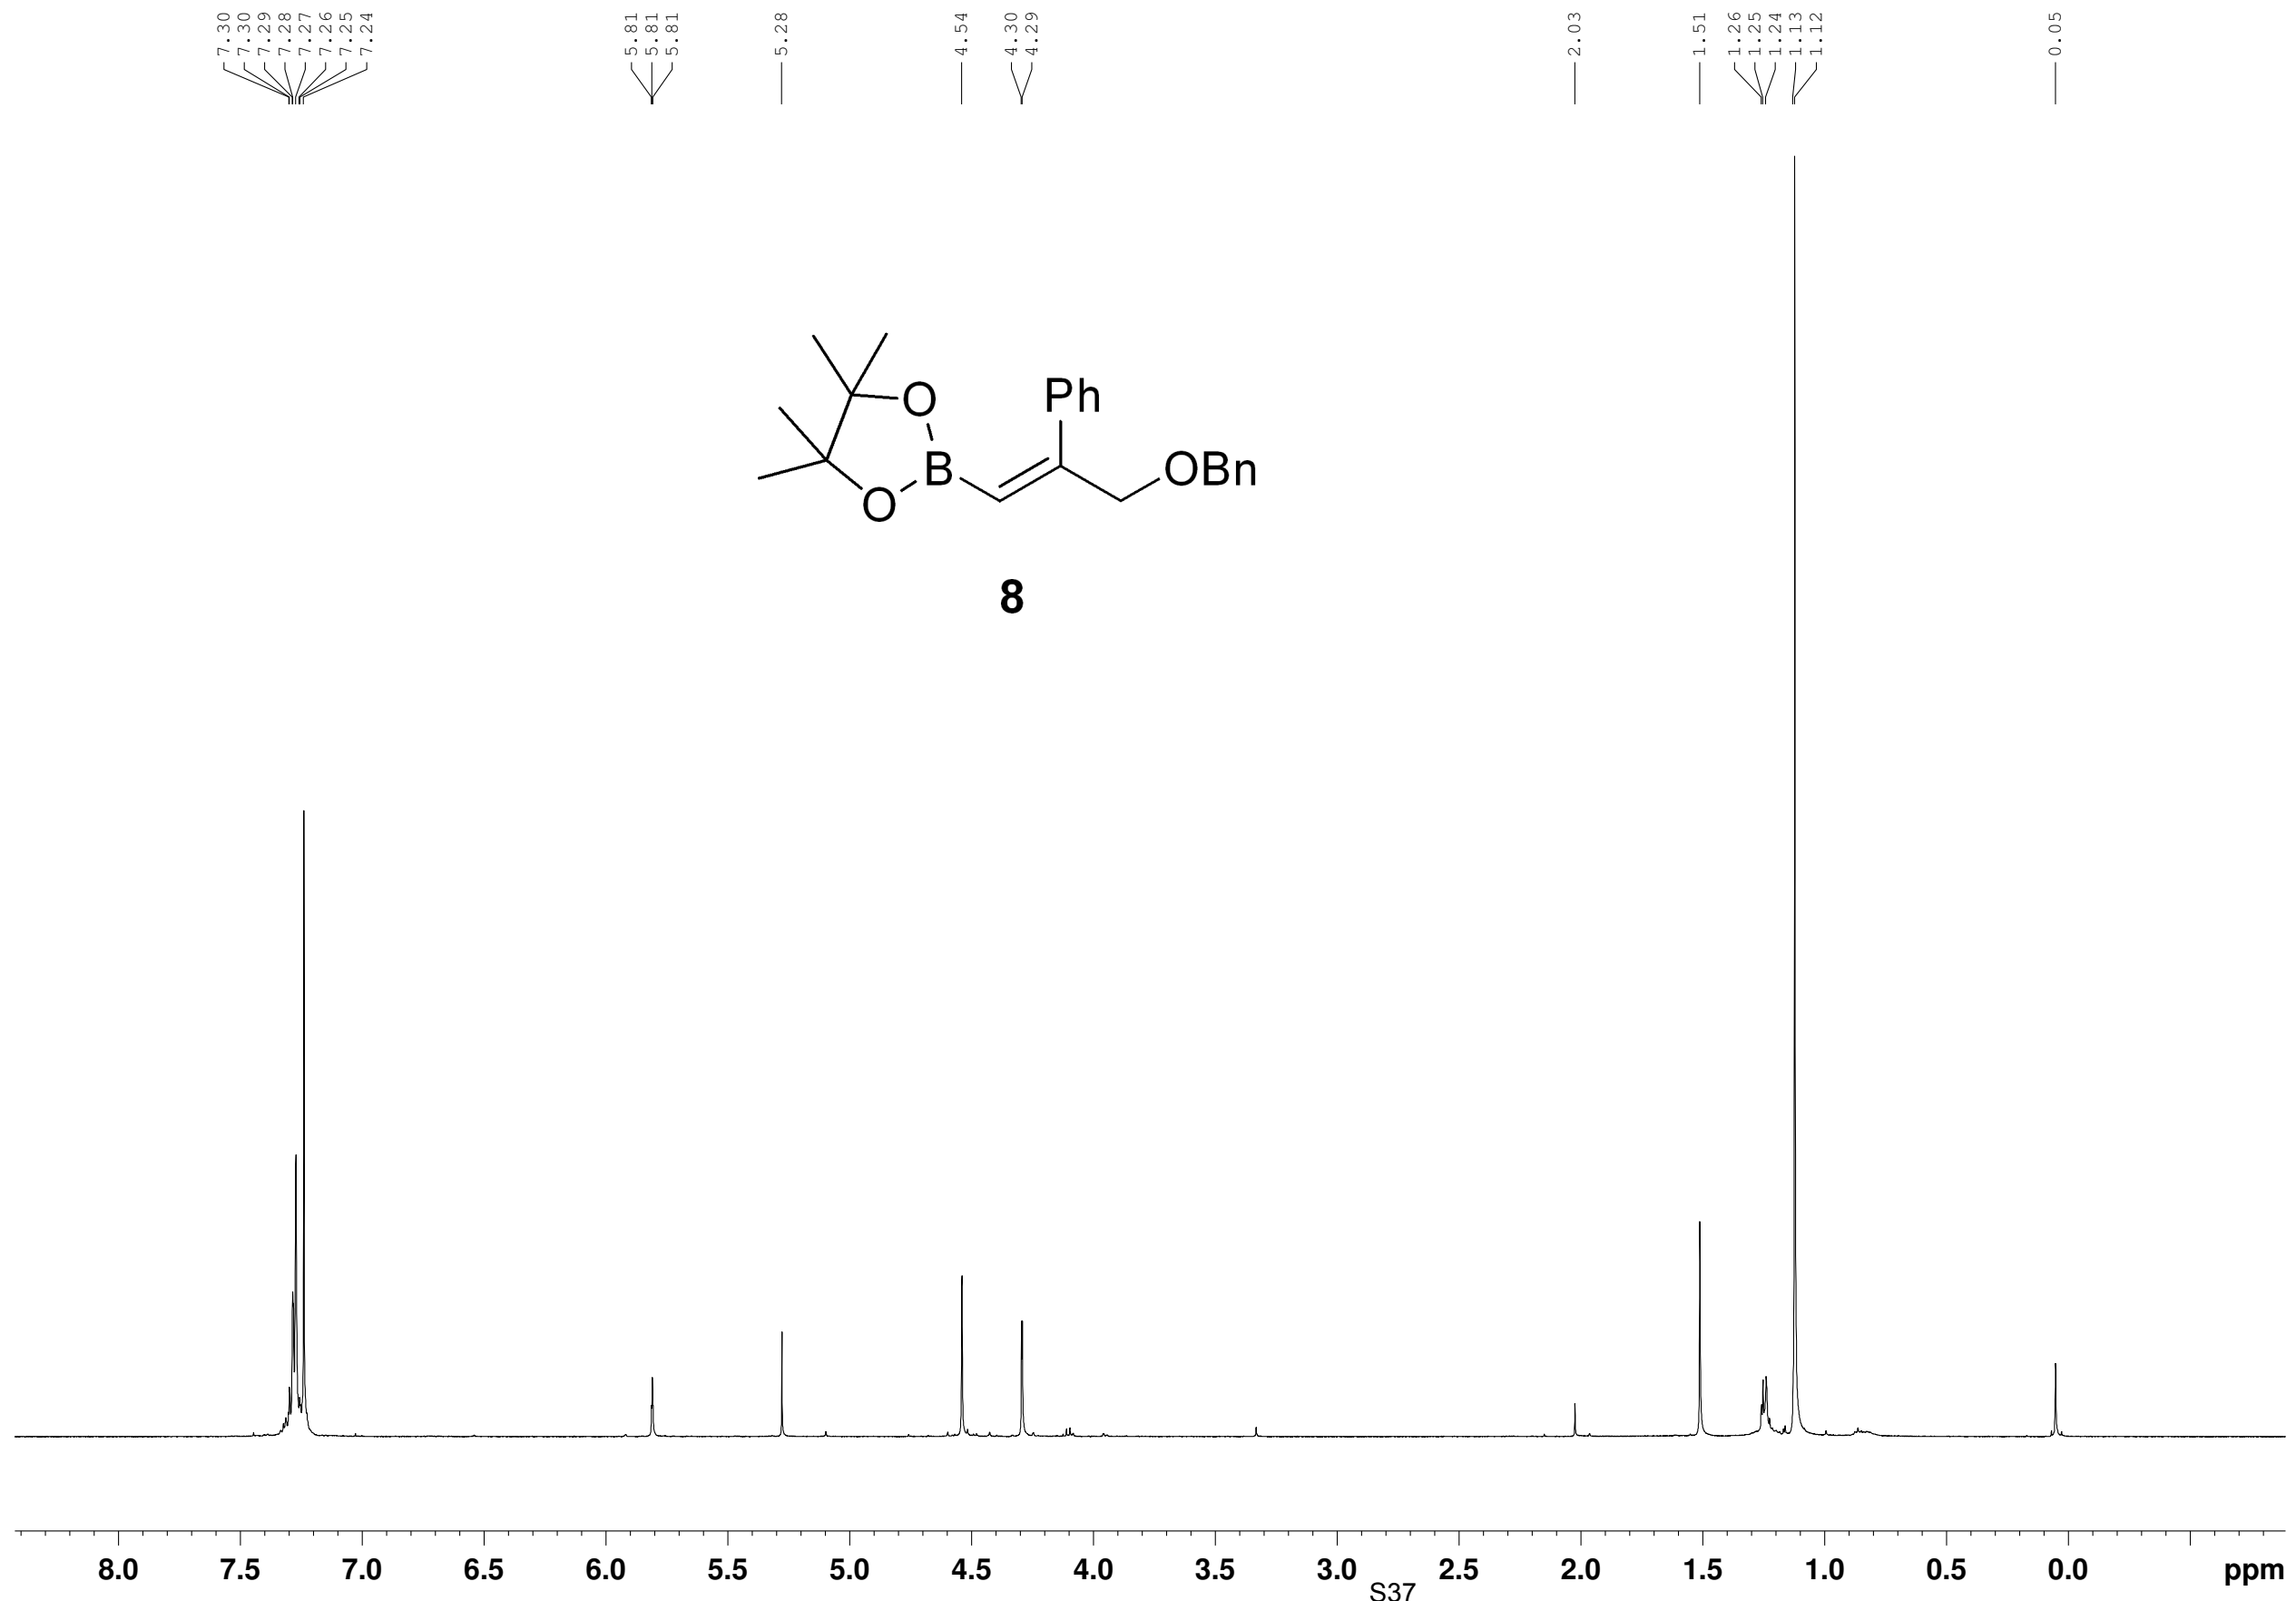

Current Data Parameters  
 NAME Rs-3-180  
 EXPNO 1  
 PROCNO 1

F2 - Acquisition Parameters  
 Date\_ 20090213  
 Time 13.53  
 INSTRUM spect  
 PROBHD 5 mm Multinucl  
 PULPROG zg30  
 TD 65536  
 SOLVENT CDC13  
 NS 16  
 DS 2  
 SWH 10330.578 Hz  
 FIDRES 0.157632 Hz  
 AQ 3.1719923 sec  
 RG 574.7  
 DW 48.400 usec  
 DE 6.00 usec  
 TE 300.2 K  
 D1 1.0000000 sec  
 MCREST 0.0000000 sec  
 MCWRK 0.0150000 sec

==== CHANNEL f1 =====  
 NUC1 1H  
 P1 14.80 usec  
 PL1 -1.00 dB  
 SFO1 500.0230878 MHz

F2 - Processing parameters  
 SI 32768  
 SF 500.0200213 MHz  
 WDW EM  
 SSB 0  
 LB 0.30 Hz  
 GB 0  
 PC 1.00

7.308  
7.304  
7.298  
7.295  
7.292  
7.288  
7.284  
7.279  
7.275  
7.266  
7.263  
7.257  
7.240  
7.217  
7.212  
7.200  
7.196  
7.189  
7.184  
7.179  
7.176  
7.174  
7.170  
7.165  
6.849  
6.832  
6.829  
6.636  
5.279

4.590  
4.297  
4.294  
4.112  
4.095

3.487  
3.469  
3.452  
3.434

2.151  
2.025

1.517  
1.289  
1.258  
1.240  
1.222  
1.207  
1.190  
1.172  
0.866

0.069  
0.060  
0.051  
0.043

The Ohio State University  
Department of Chemistry  
NMR Facility  
400MHz - 0083

Current Data Parameters  
NAME Rs-3-181-LP  
EXPNO 1  
PROCNO 1

F2 - Acquisition Parameters  
Date\_ 20090214  
Time 11.25  
INSTRUM spect  
PROBHD 5 mm QNP 1H/13  
PULPROG zg30  
TD 65536  
SOLVENT CDCl3  
NS 16  
DS 2  
SWH 8278.146 Hz  
FIDRES 0.126314 Hz  
AQ 3.9584243 sec  
RG 322.5  
DW 60.400 use  
DE 6.00 use  
TE 300.2 K  
D1 1.00000000 sec  
MCREST 0.00000000 sec  
MCWRK 0.01500000 sec

==== CHANNEL f1 =====  
NUC1 1H  
P1 13.00 use  
PL1 0.00 dB  
SFO1 400.1324710 MHz

F2 - Processing parameters  
SI 32768  
SF 400.1300174 MHz  
WDW EM  
SSB 0  
LB 0.30 Hz  
GB 0  
PC 1.00

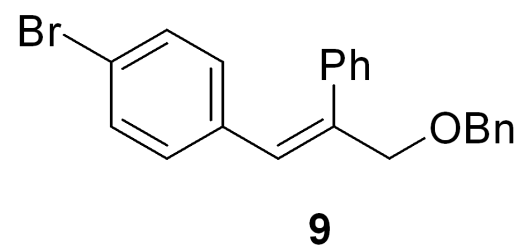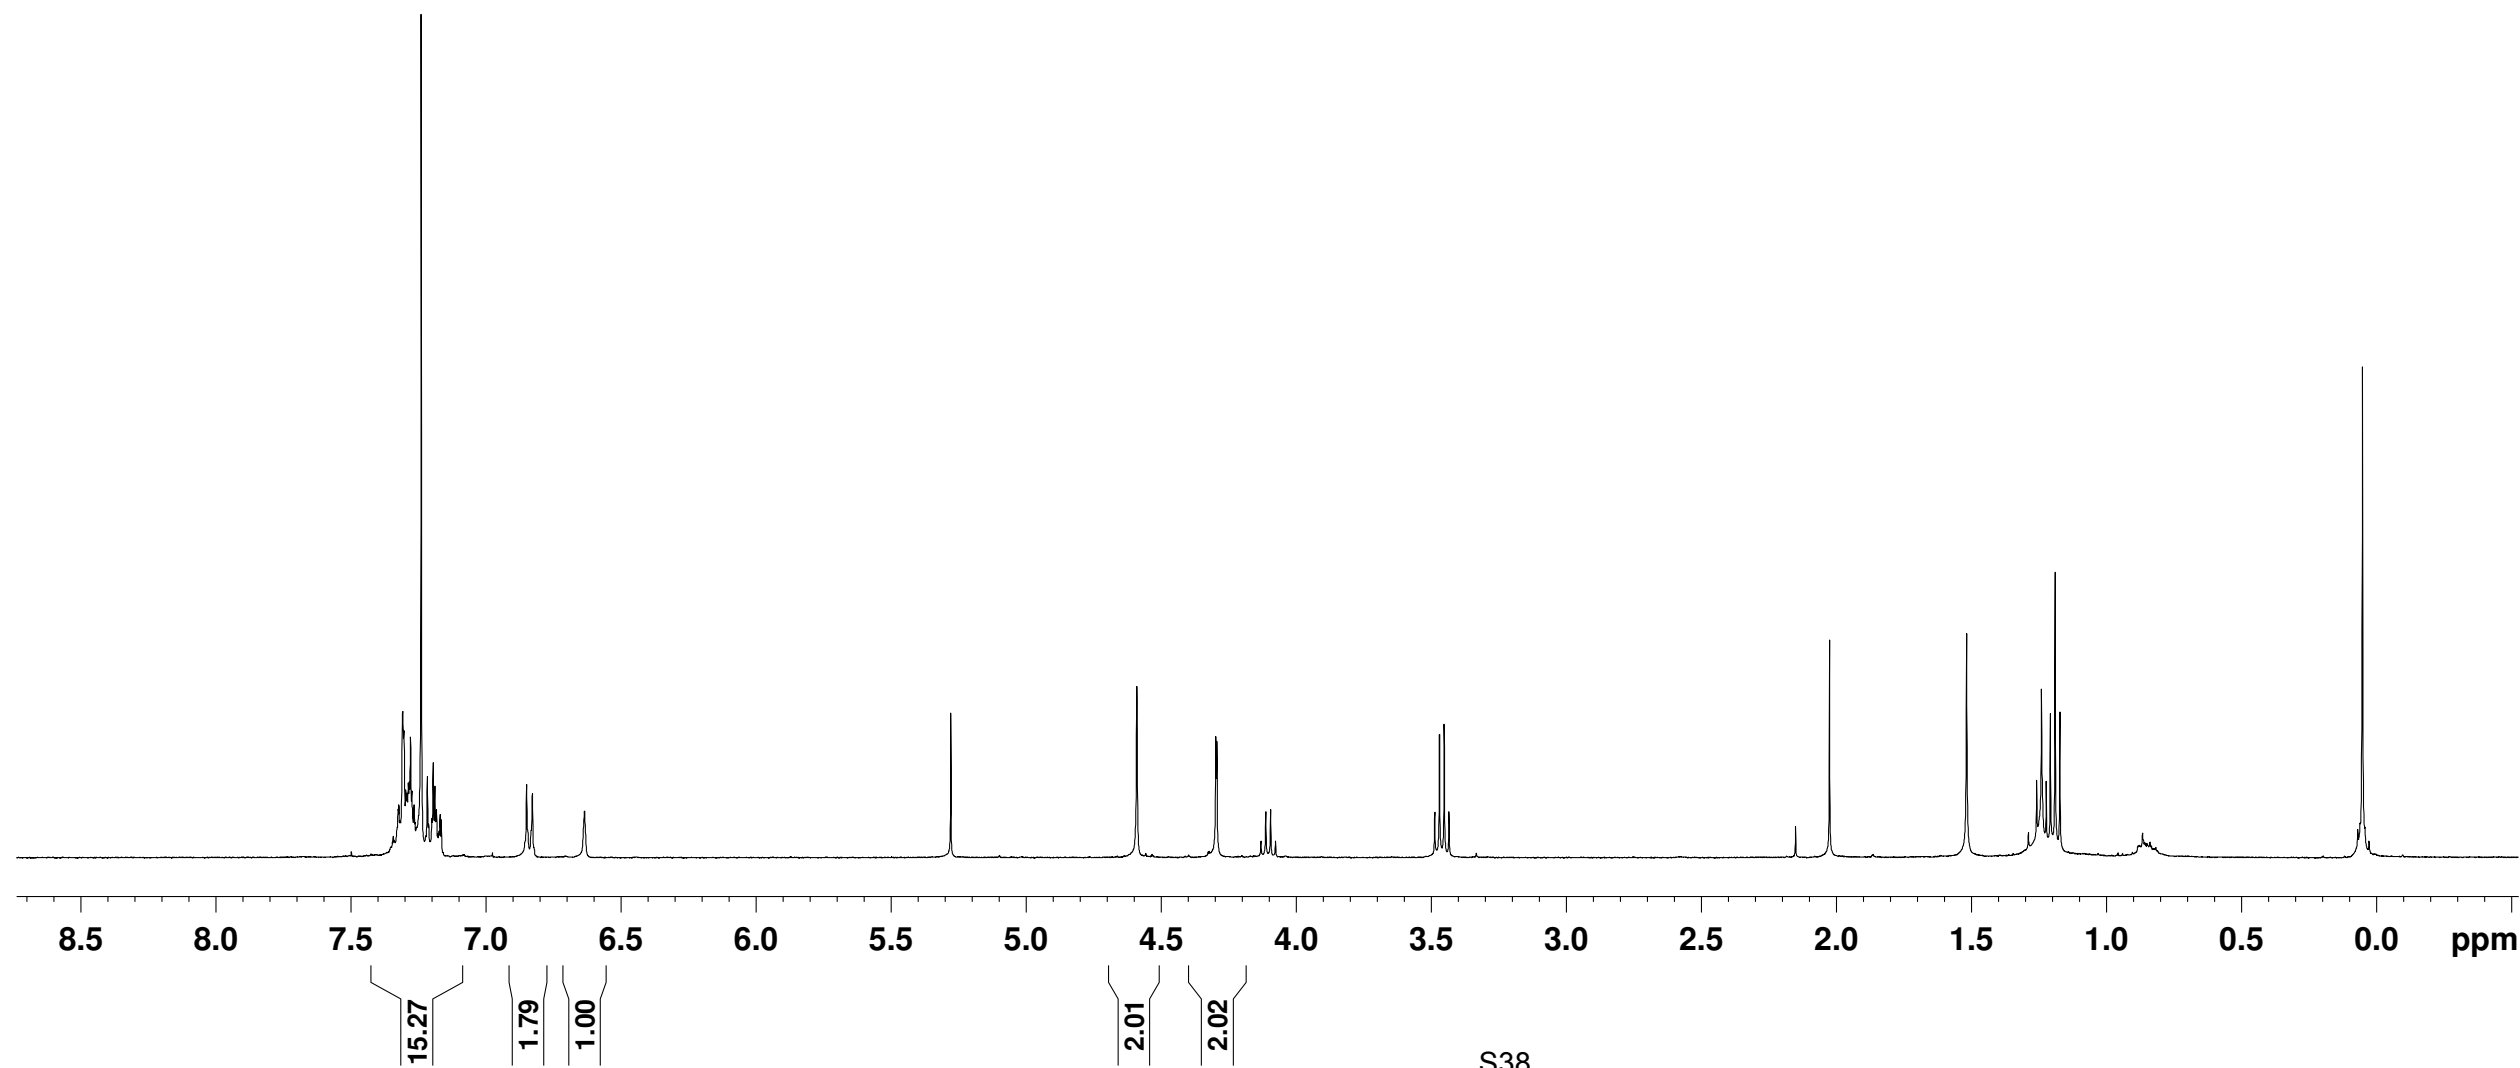

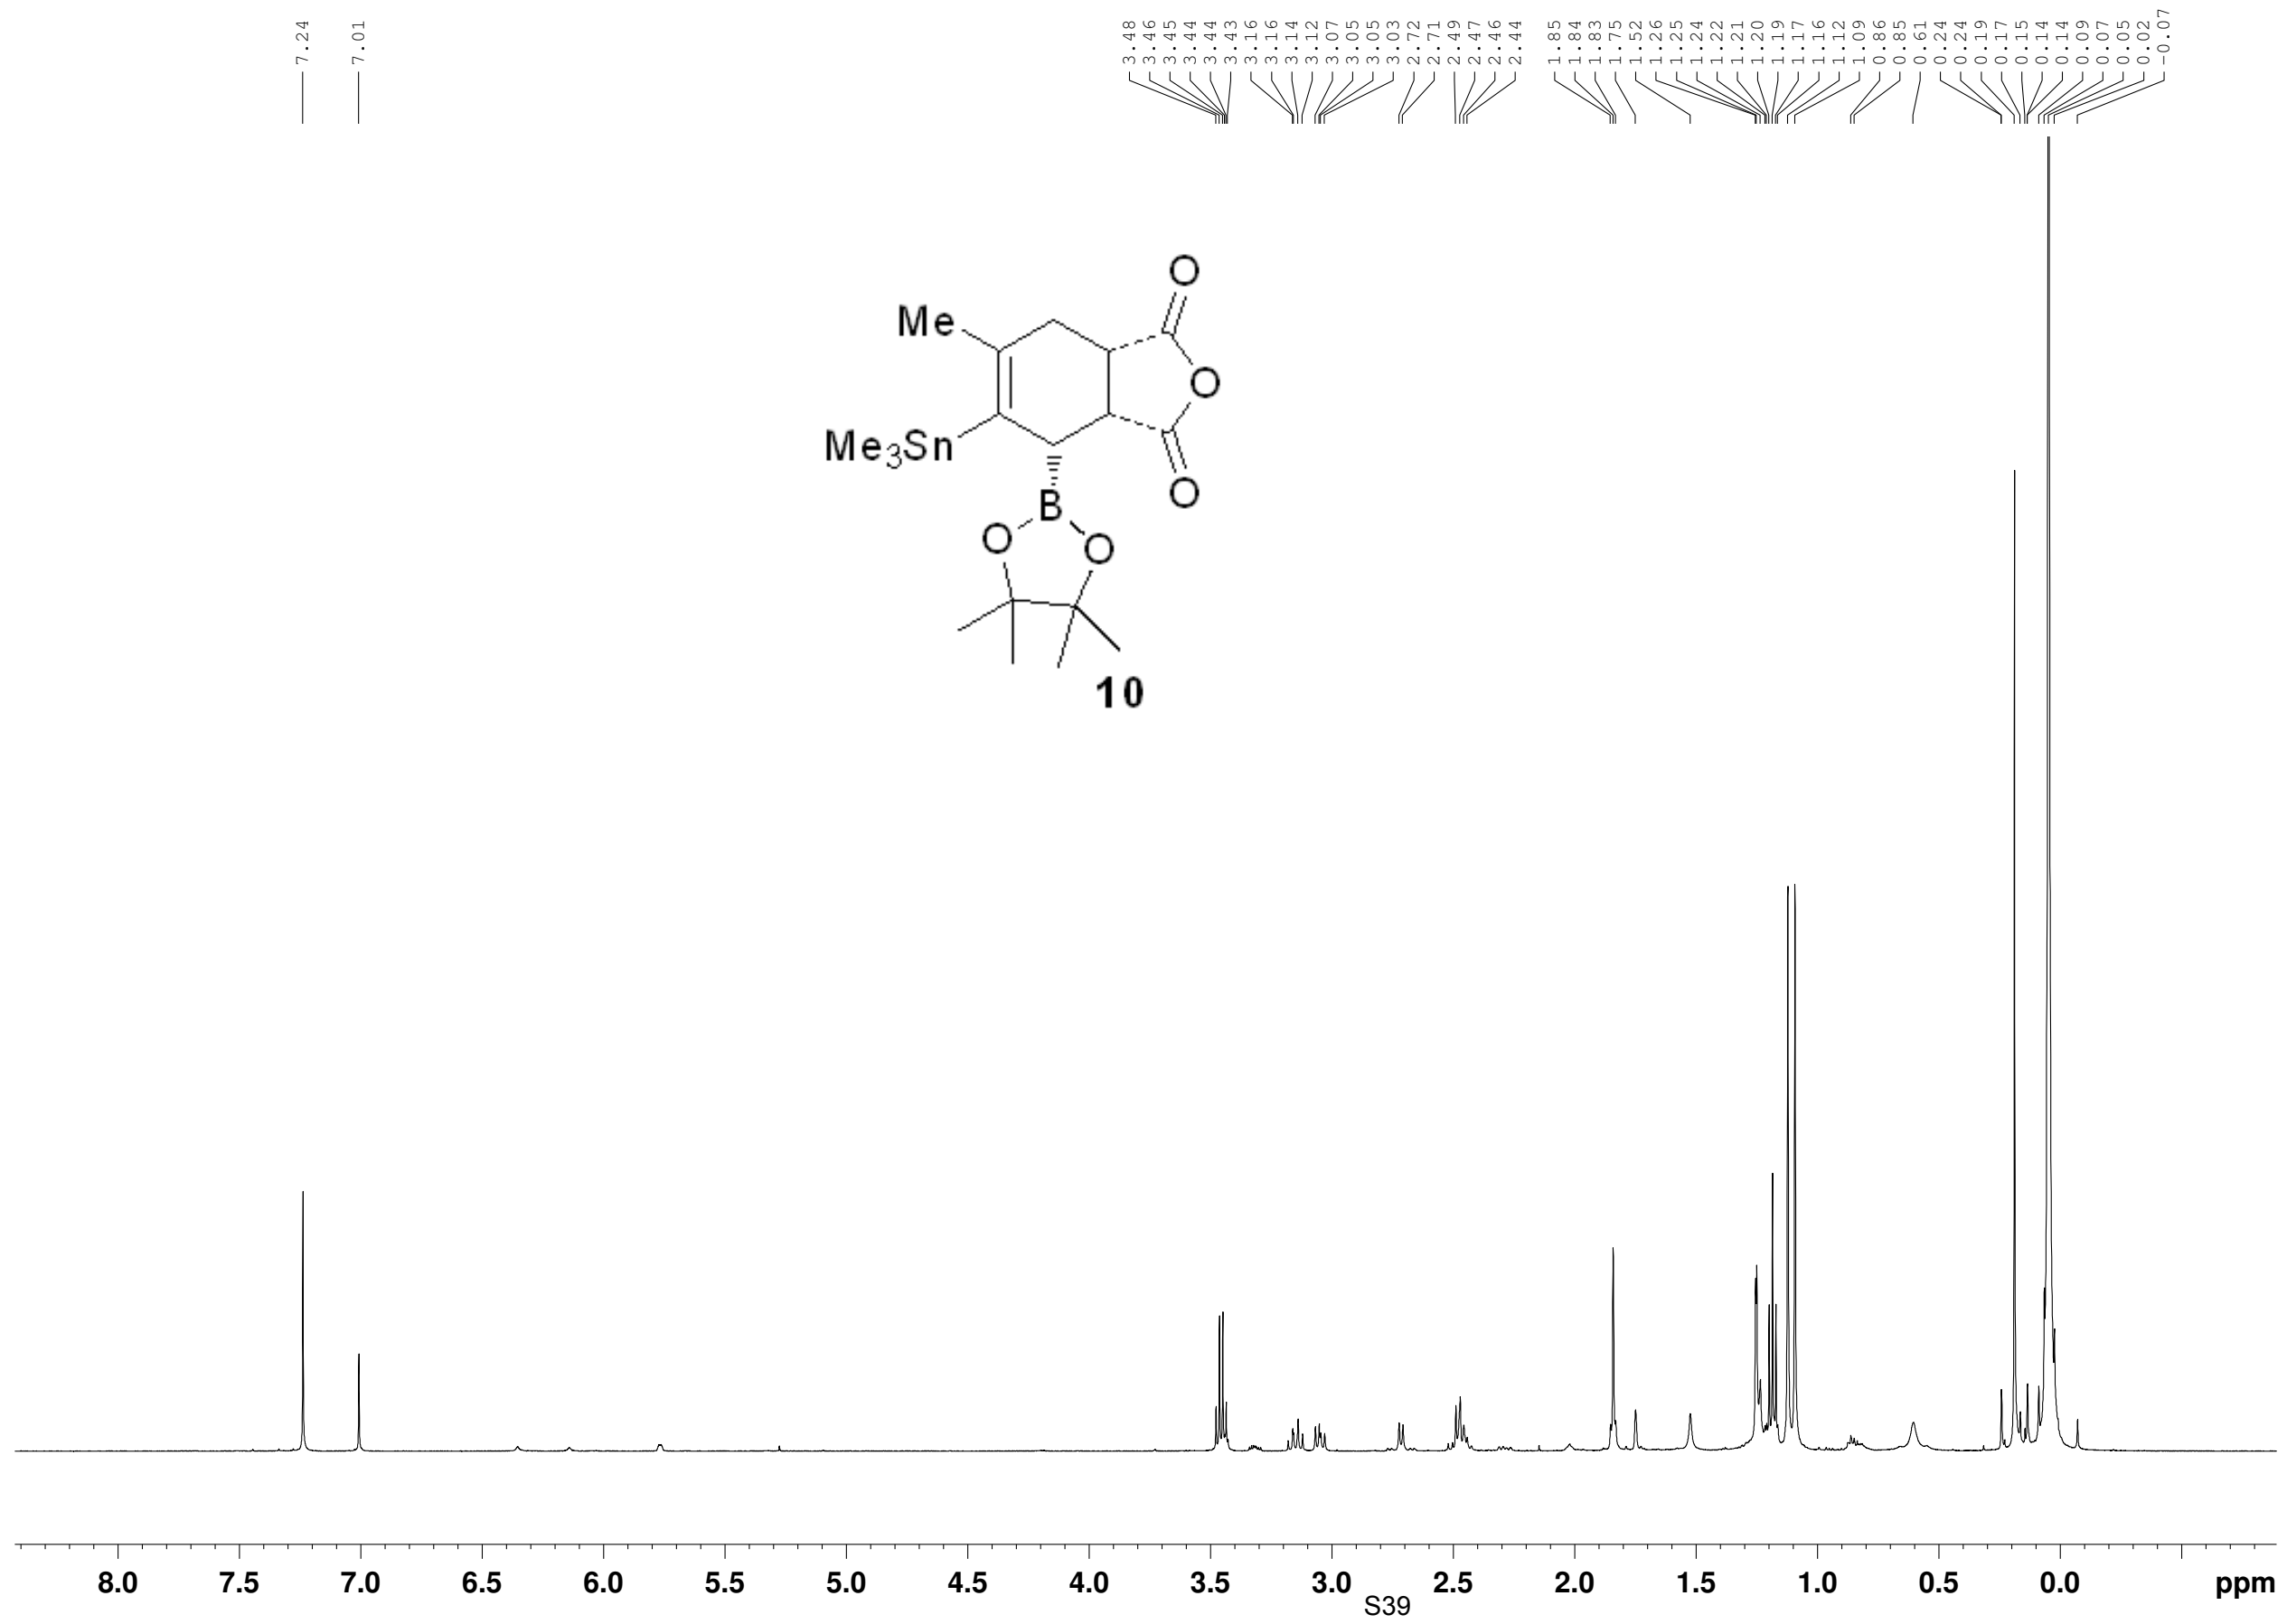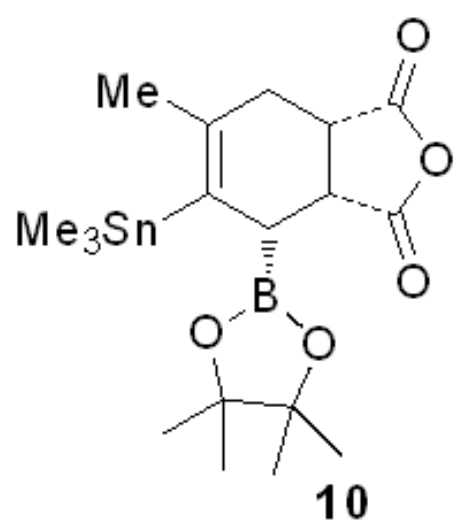

Current Data Parameters  
 NAME Rs-3-222  
 EXPNO 1  
 PROCNO 1

F2 - Acquisition Parameters  
 Date\_ 20090319  
 Time 13.45  
 INSTRUM spect  
 PROBHD 5 mm Multinucl  
 PULPROG zg30  
 TD 65536  
 SOLVENT CDCl3  
 NS 16  
 DS 2  
 SWH 10330.578 Hz  
 FIDRES 0.157632 Hz  
 AQ 3.1719923 sec  
 RG 256  
 DW 48.400 usec  
 DE 6.00 usec  
 TE 300.2 K  
 D1 1.0000000 sec  
 MCREST 0.0000000 sec  
 MCWRK 0.0150000 sec

==== CHANNEL f1 =====  
 NUC1 1H  
 P1 14.80 usec  
 PL1 -1.00 dB  
 SFO1 500.0230878 MHz

F2 - Processing parameters  
 SI 32768  
 SF 500.0200219 MHz  
 WDW EM  
 SSB 0  
 LB 0.30 Hz  
 GB 0  
 PC 1.40



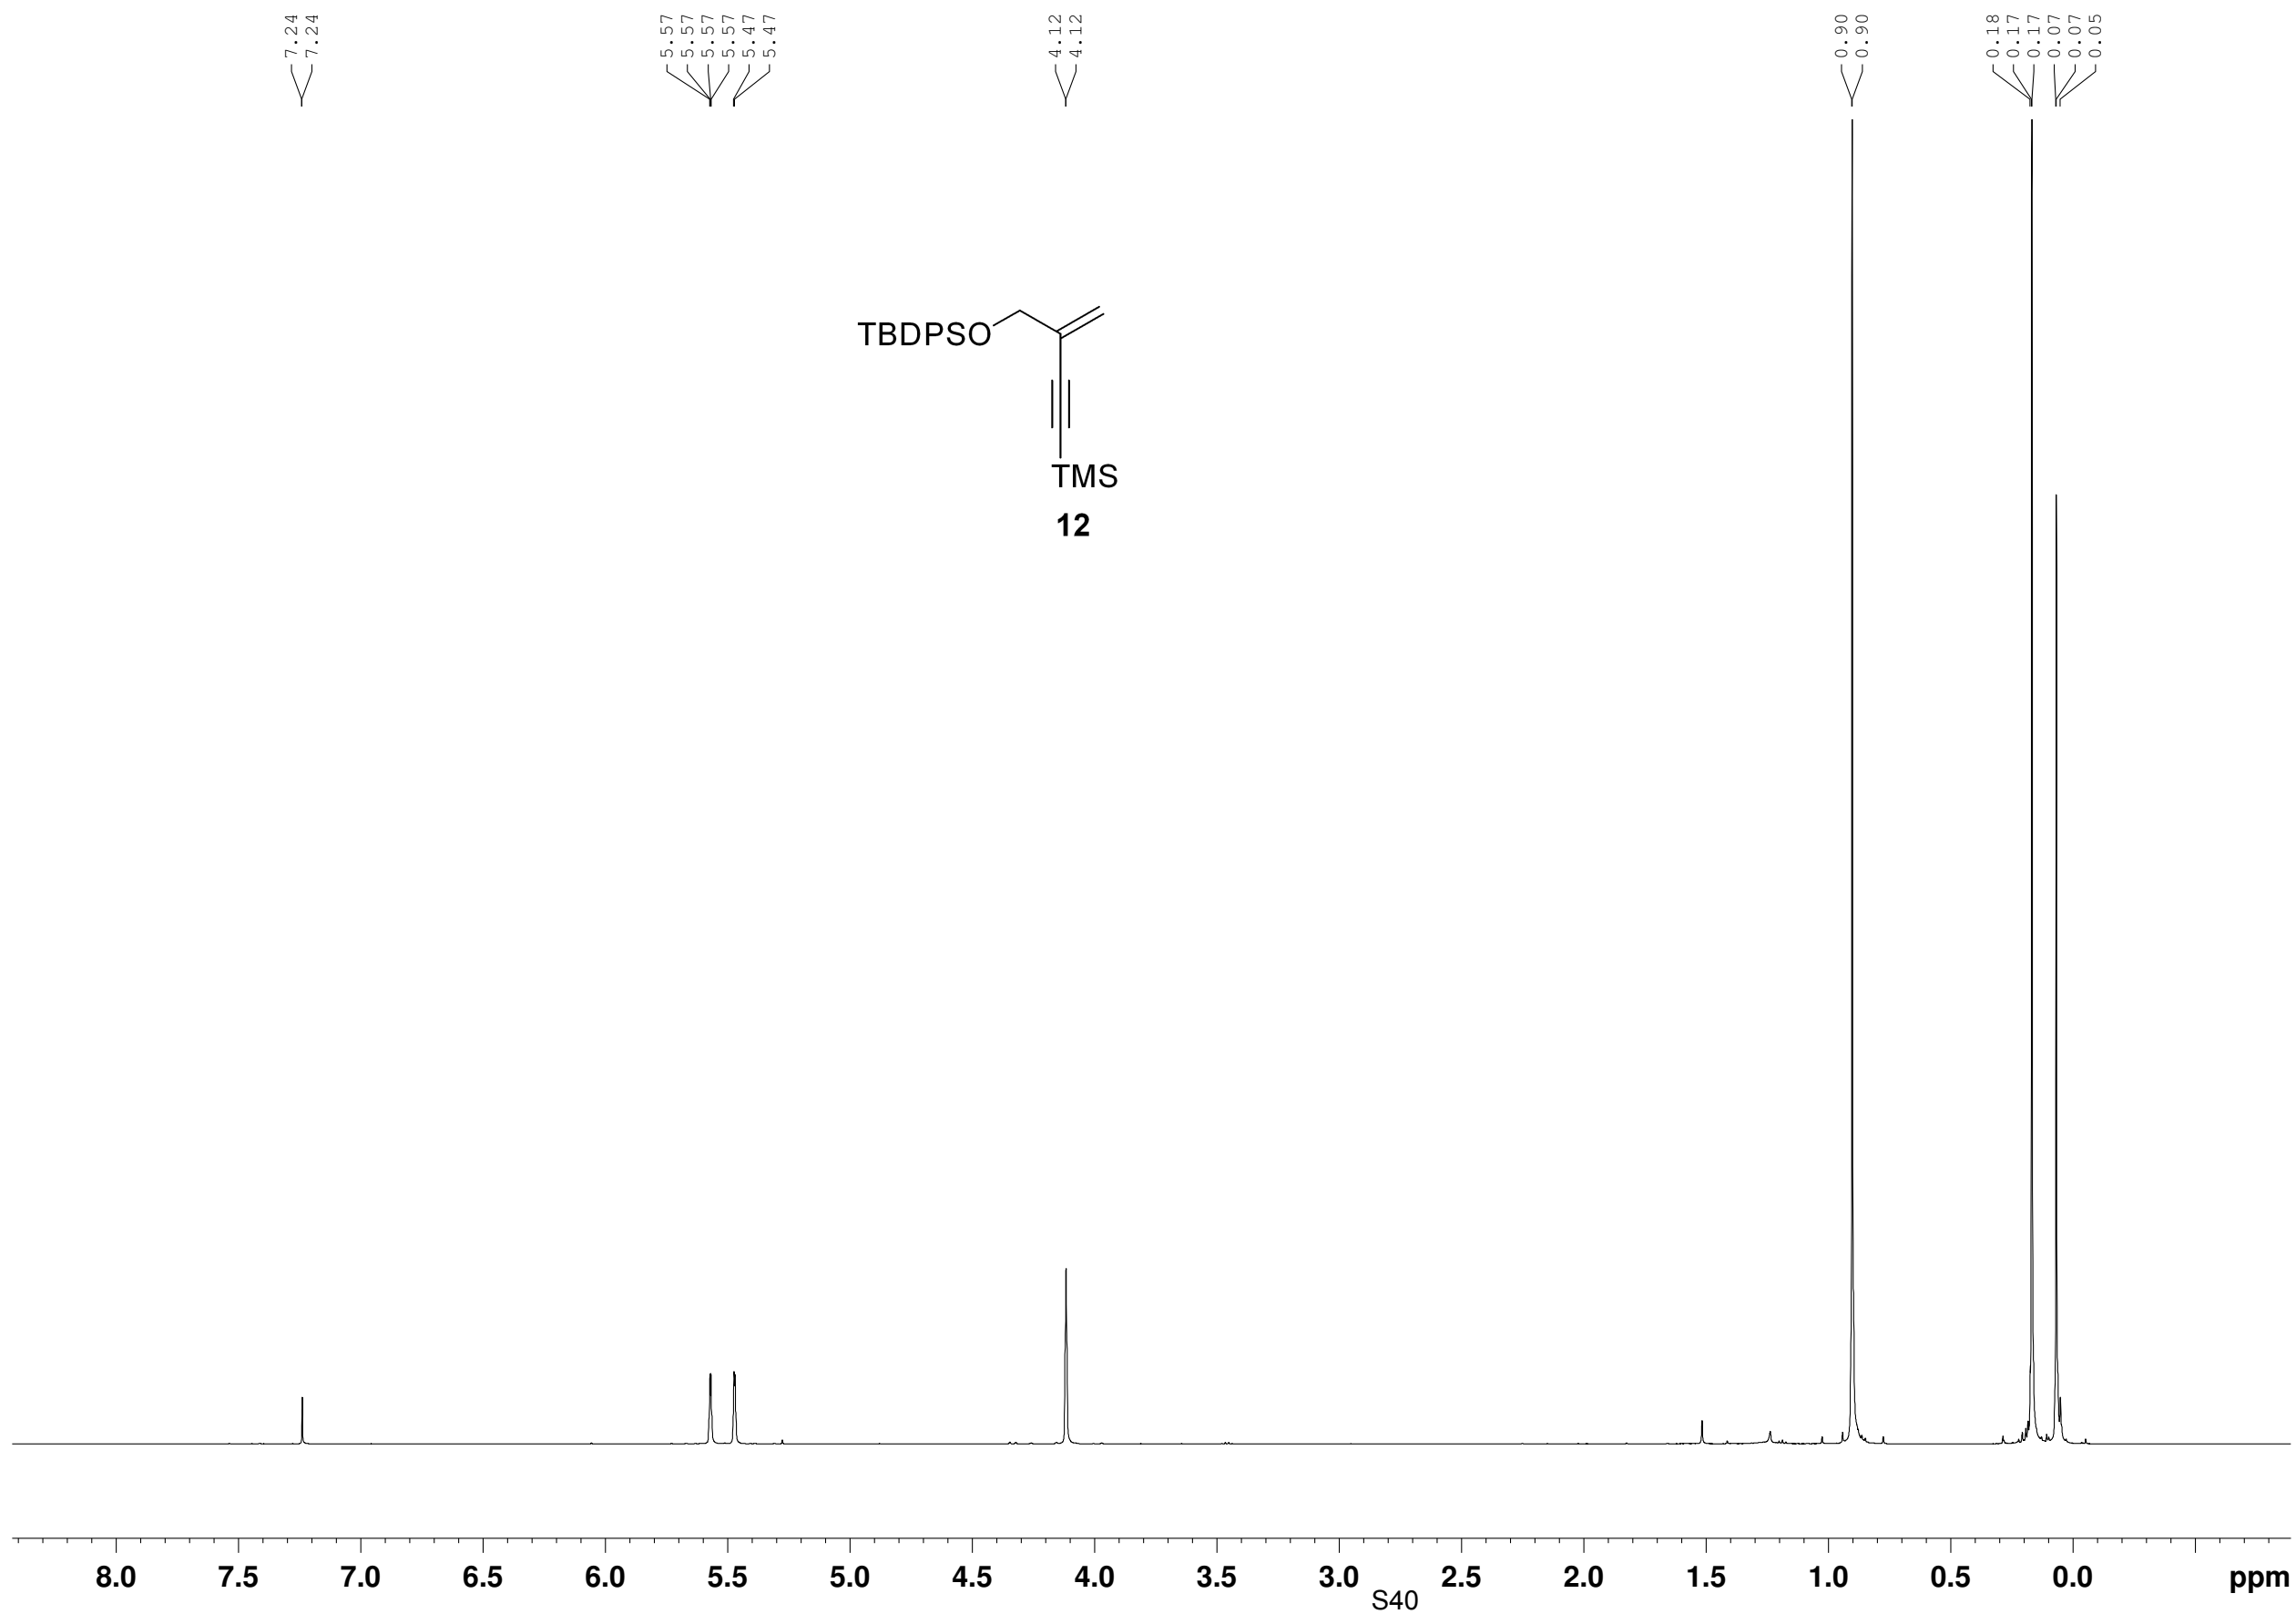

Current Data Parameters  
 NAME Rs-3-240  
 EXPNO 1  
 PROCNO 1

F2 - Acquisition Parameters  
 Date\_ 20090408  
 Time 18.03  
 INSTRUM spect  
 PROBHD 5 mm Multinucl  
 PULPROG zg30  
 TD 65536  
 SOLVENT CDC13  
 NS 16  
 DS 2  
 SWH 10330.578 Hz  
 FIDRES 0.157632 Hz  
 AQ 3.1719923 sec  
 RG 143.7  
 DW 48.400 usec  
 DE 6.00 usec  
 TE 300.2 K  
 D1 1.0000000 sec  
 MCREST 0.0000000 sec  
 MCWRK 0.0150000 sec

==== CHANNEL f1 =====  
 NUC1 1H  
 P1 14.80 usec  
 PL1 -1.00 dB  
 SFO1 500.0230878 MHz

F2 - Processing parameters  
 SI 32768  
 SF 500.0200213 MHz  
 WDW EM  
 SSB 0  
 LB 0.30 Hz  
 GB 0  
 PC 1.40

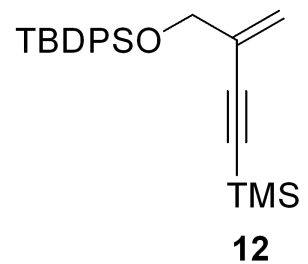

131.27  
 120.66  
 103.40  
 95.43  
 77.48  
 77.23  
 76.97  
 65.25  
 26.10  
 18.60  
 0.14

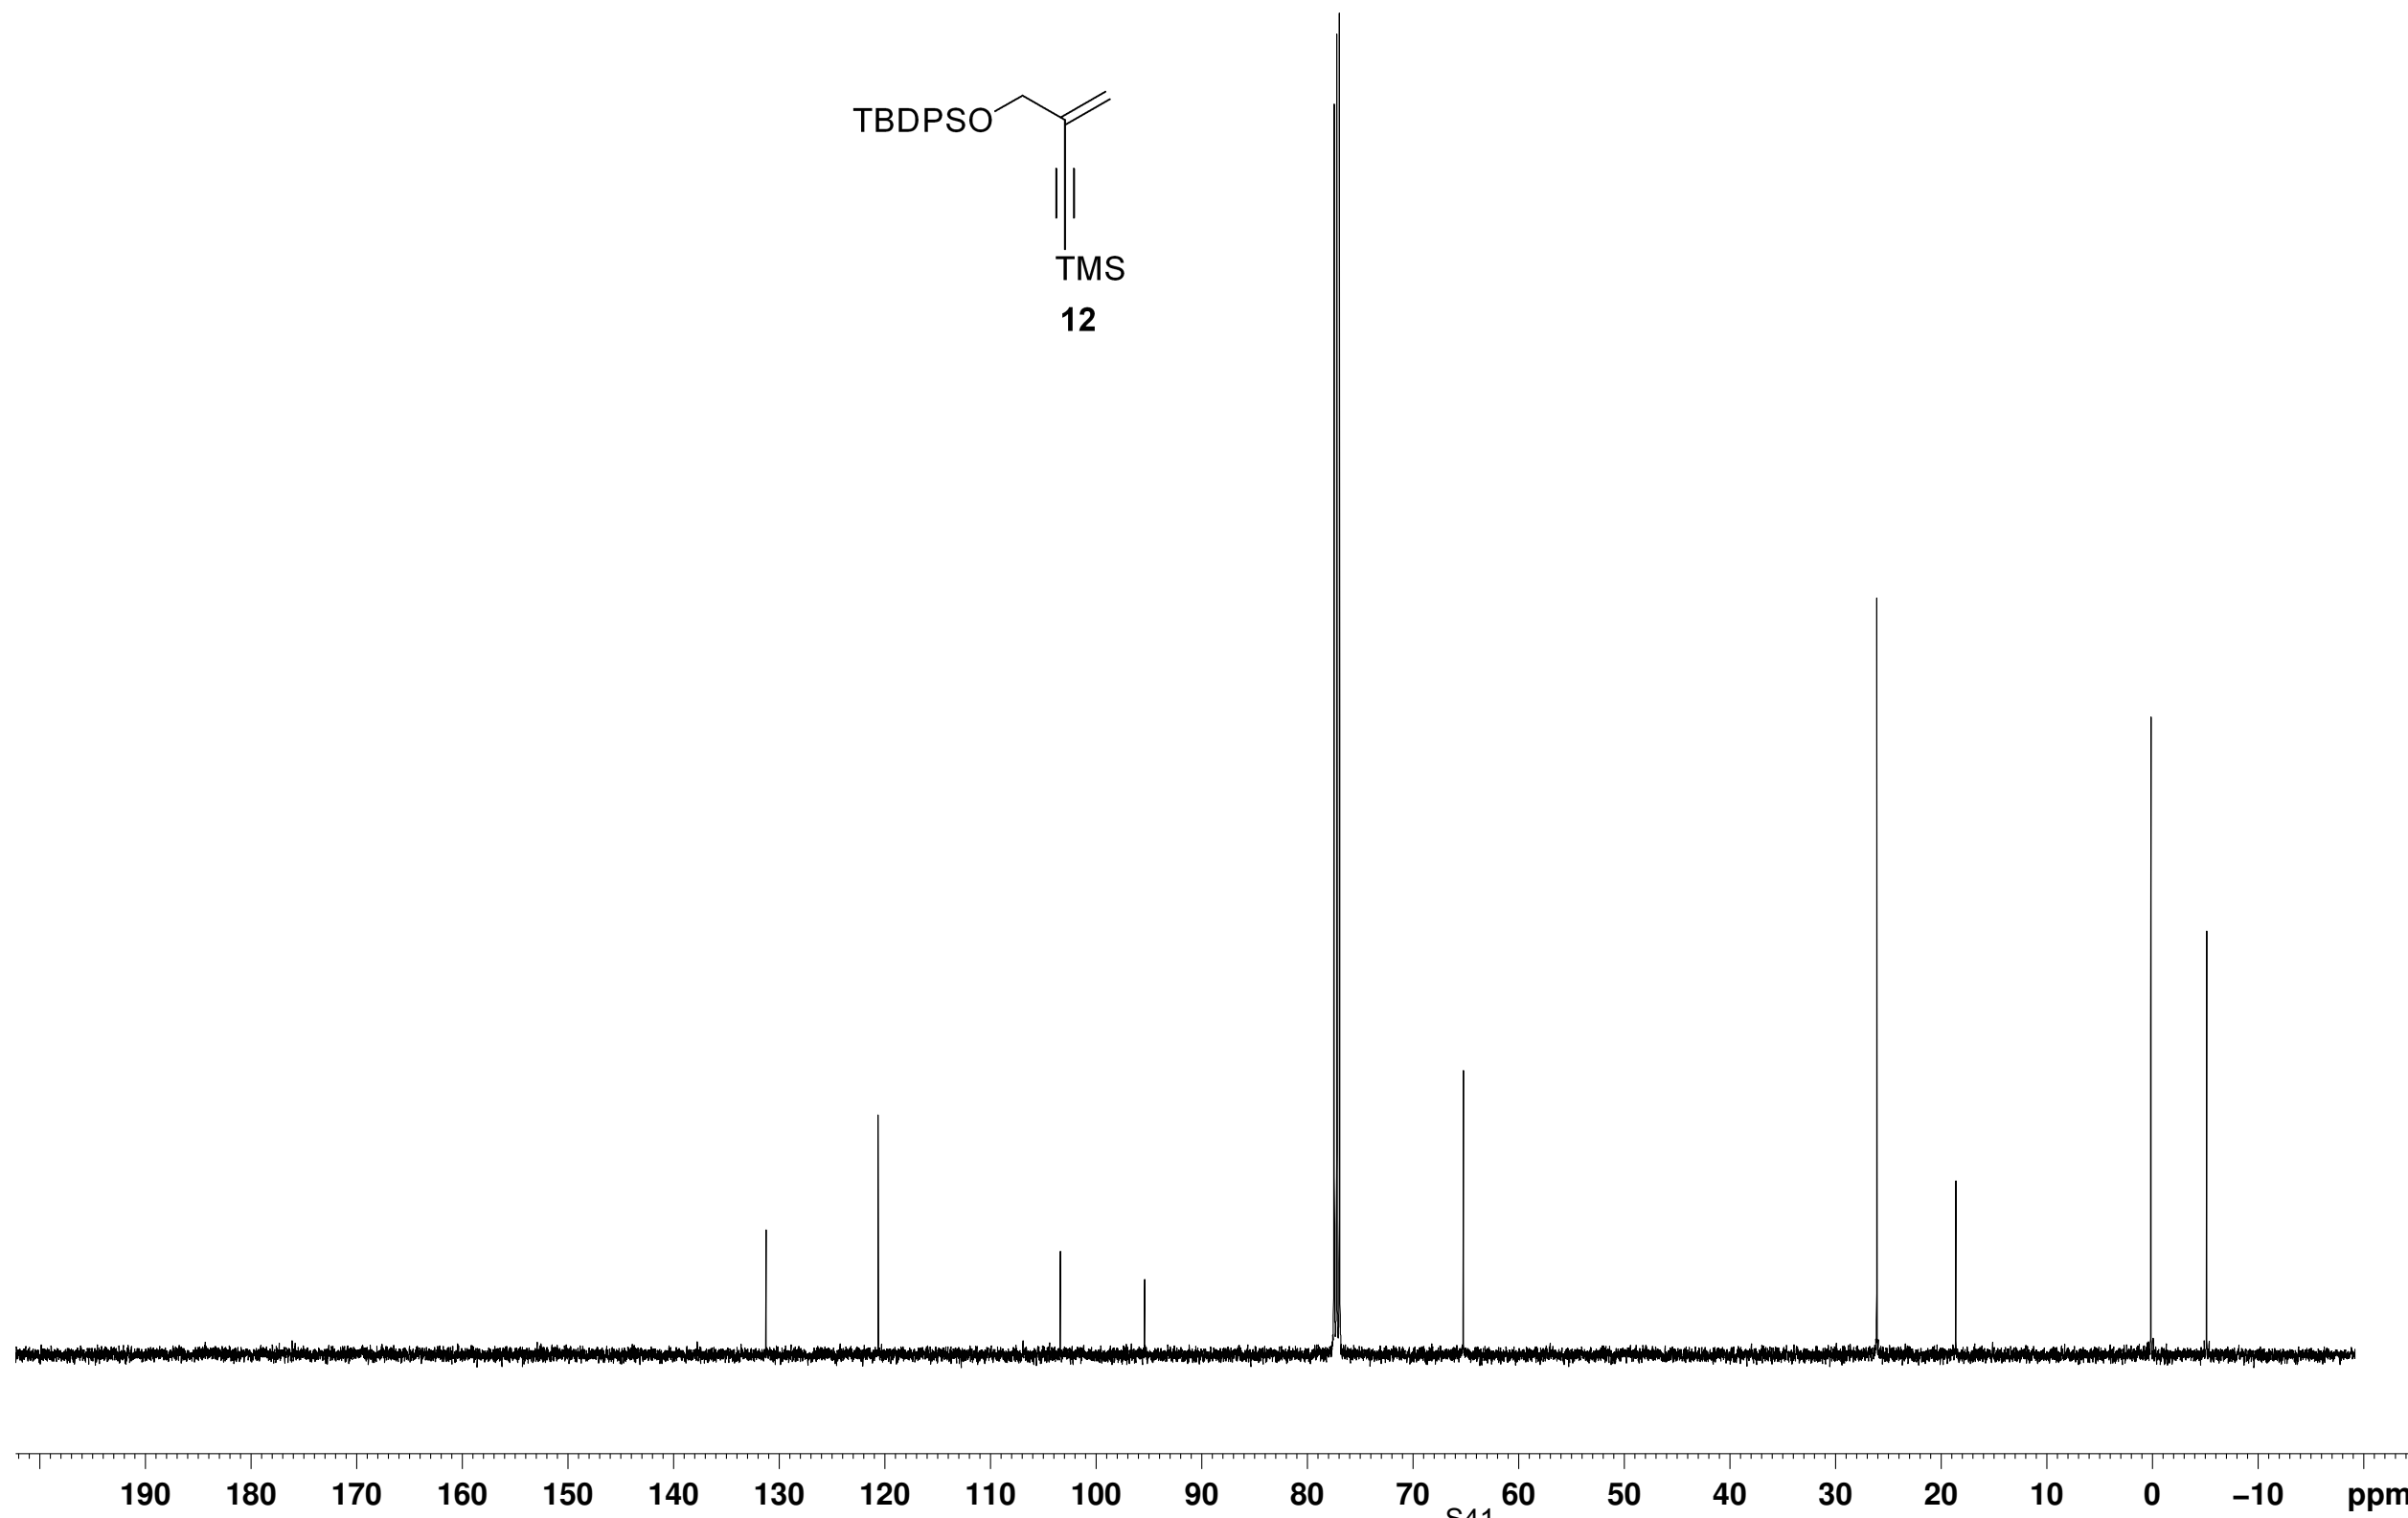

Current Data Parameters  
 NAME Rs-3-240  
 EXPNO 2  
 PROCNO 1

F2 - Acquisition Parameters  
 Date\_ 20090408  
 Time 18.09  
 INSTRUM spect  
 PROBHD 5 mm Multinucl  
 PULPROG zgpg30  
 TD 65536  
 SOLVENT CDCl3  
 NS 489  
 DS 4  
 SWH 30030.029 Hz  
 FIDRES 0.458222 Hz  
 AQ 1.0912244 sec  
 RG 6502  
 DW 16.650 usec  
 DE 12.00 usec  
 TE 300.2 K  
 D1 2.0000000 sec  
 d11 0.03000000 sec  
 DELTA 1.89999998 sec  
 MCREST 0.00000000 sec  
 MCWRK 0.01500000 sec

===== CHANNEL f1 =====  
 NUC1 13C  
 P1 12.00 usec  
 PL1 3.00 dB  
 SFO1 125.7427020 MHz

===== CHANNEL f2 =====  
 CPDPRG2 waltz16  
 NUC2 1H  
 PCPD2 100.00 usec  
 PL2 -1.00 dB  
 PL12 15.59 dB  
 PL13 22.50 dB  
 SFO2 500.0220001 MHz

F2 - Processing parameters  
 SI 32768  
 SF 125.7301005 MHz  
 WDW EM  
 SSB 0  
 LB 1.00 Hz  
 GB 0  
 PC 1.00

The Ohio State University  
Department of Chemistry  
NMR Facility  
400MHz - 0083

Current Data Parameters  
NAME Rs-3-247  
EXPNO 1  
PROCNO 1

F2 - Acquisition Parameters  
Date\_ 20090416  
Time 10.26  
INSTRUM spect  
PROBHD 5 mm QNP 1H/13  
PULPROG zg30  
TD 65536  
SOLVENT CDCl3  
NS 16  
DS 2  
SWH 8278.146 Hz  
FIDRES 0.126314 Hz  
AQ 3.9584243 sec  
RG 57  
DW 60.400 use  
DE 6.00 use  
TE 298.2 K  
D1 1.00000000 sec  
MCREST 0.00000000 sec  
MCWRK 0.01500000 sec

===== CHANNEL f1 =====  
NUC1 1H  
P1 13.00 use  
PL1 0.00 dB  
SFO1 400.1324710 MHz

F2 - Processing parameters  
SI 32768  
SF 400.1300164 MHz  
WDW EM  
SSB 0  
LB 0.30 Hz  
GB 0  
PC 1.00

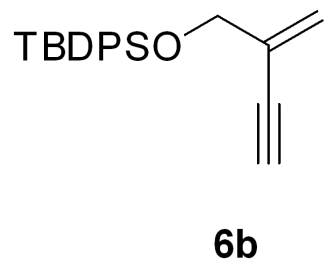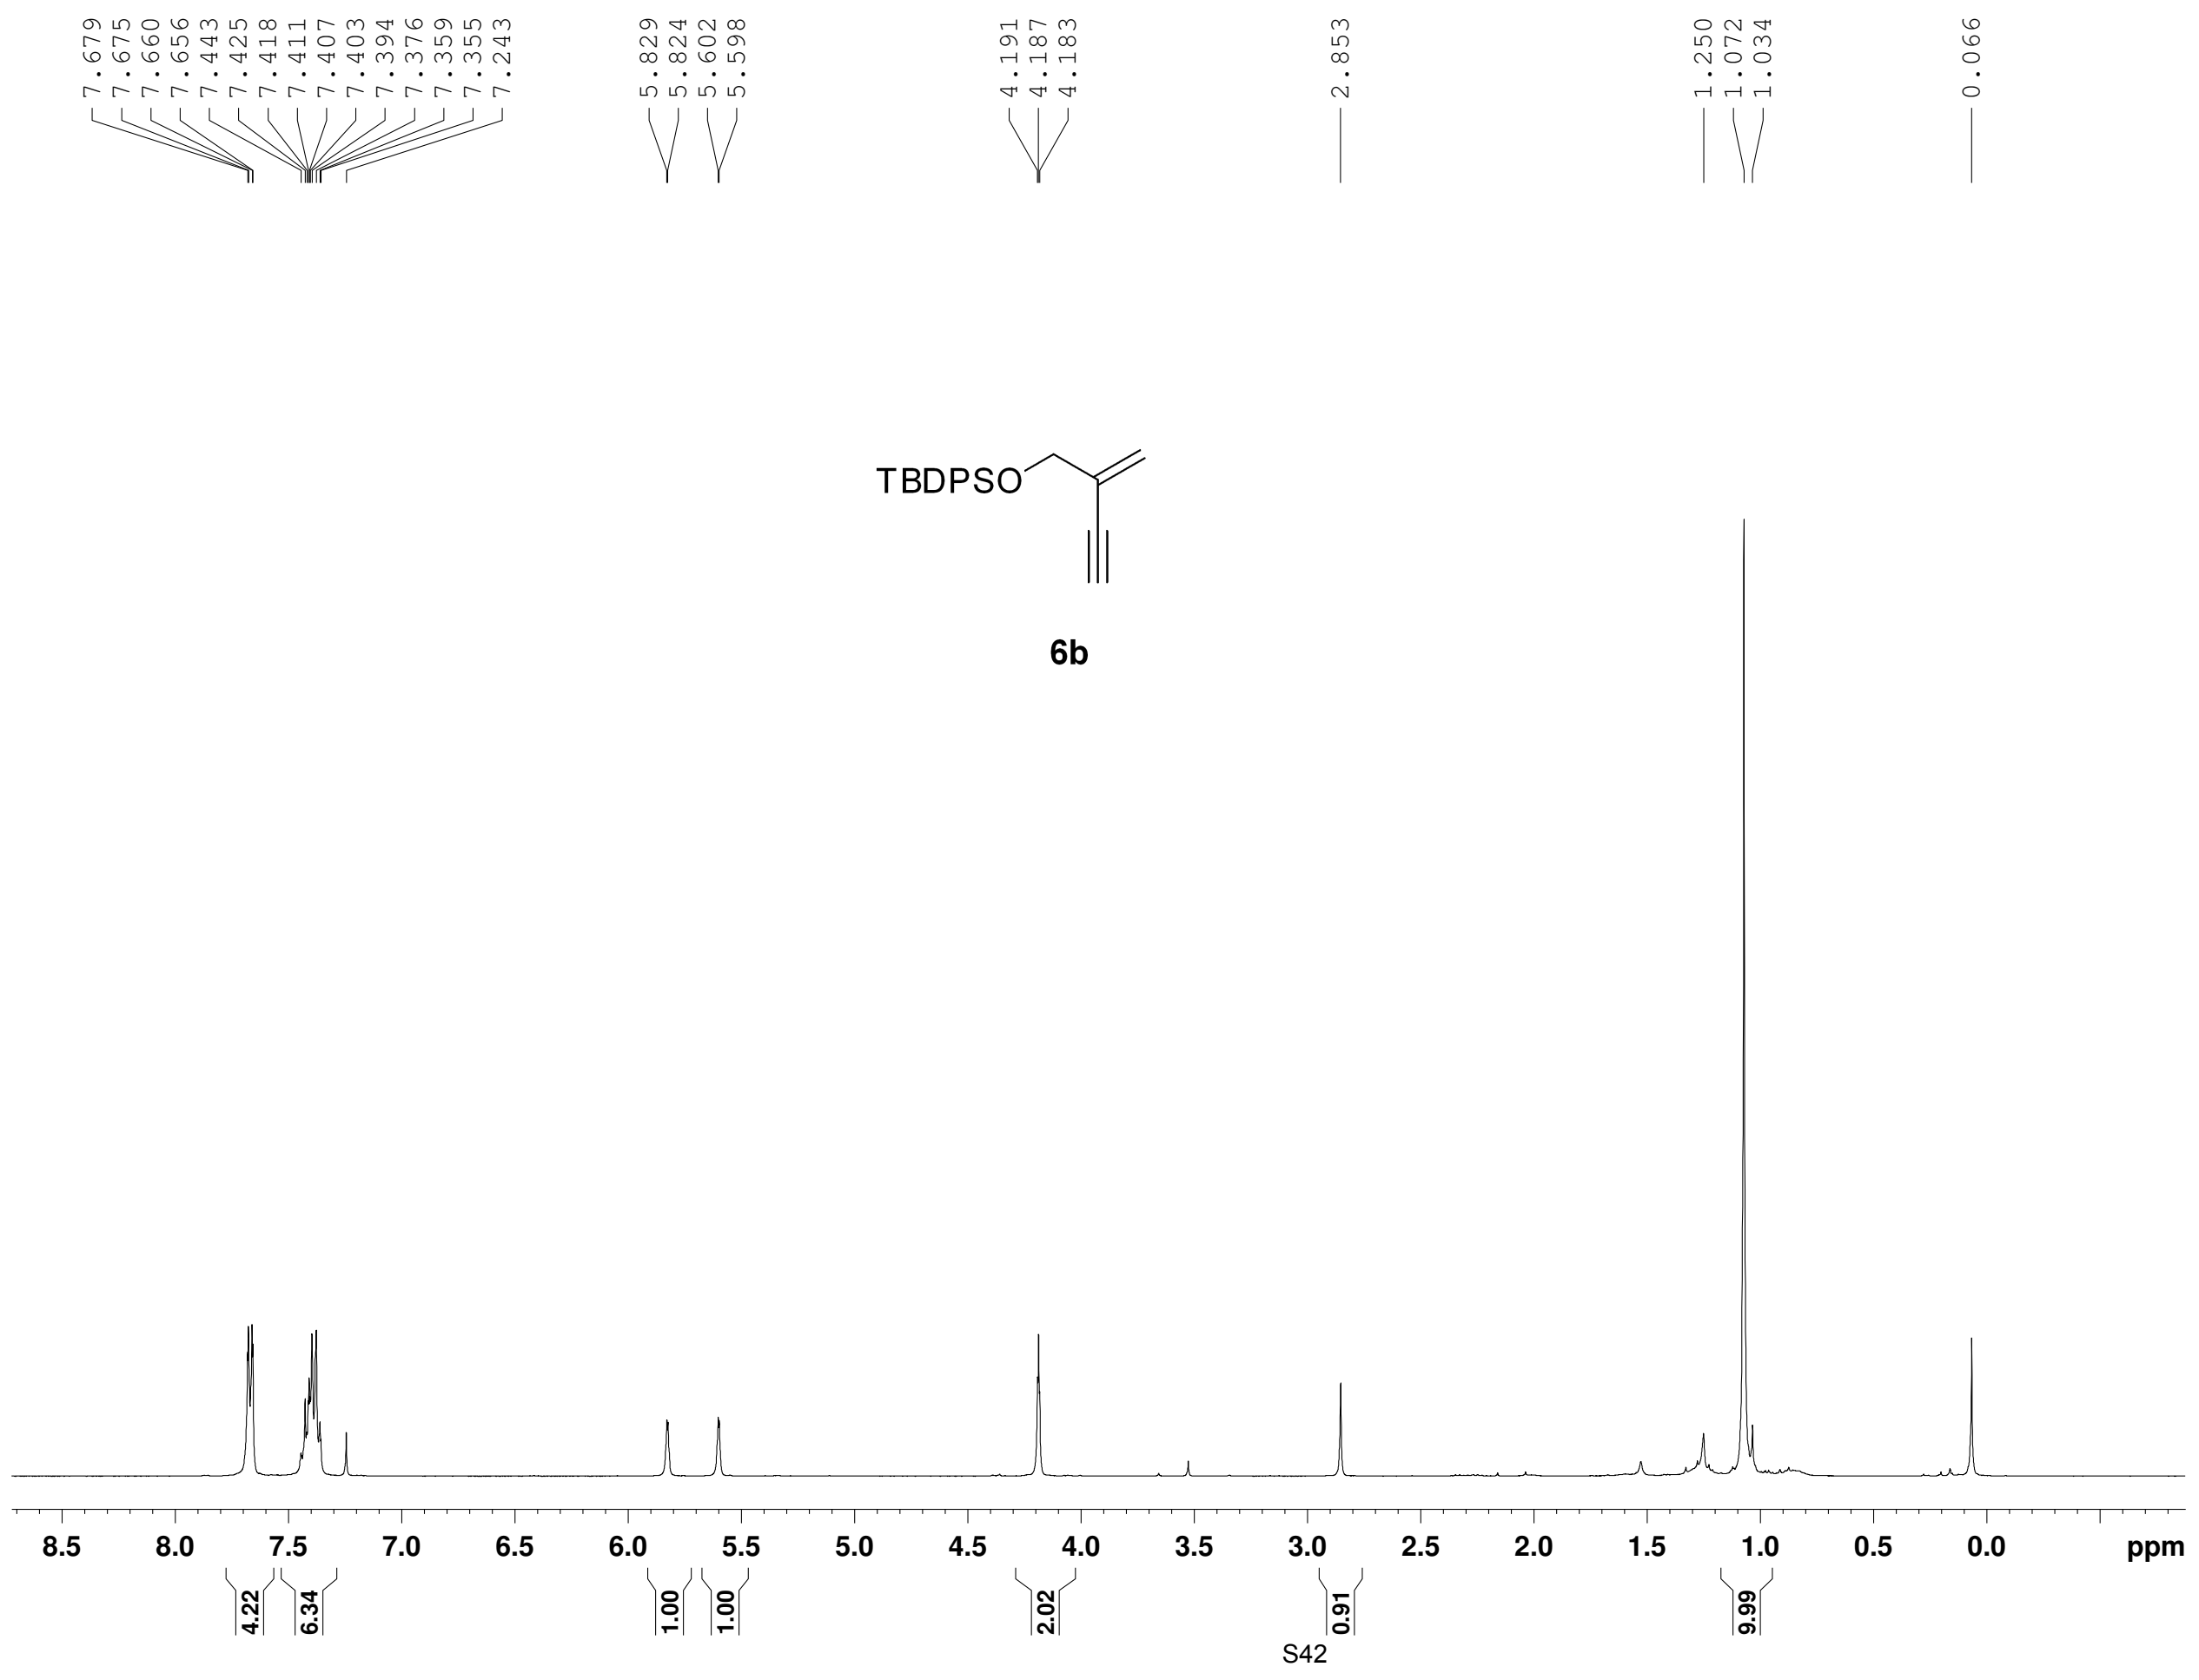

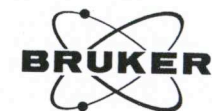

Current Data Parameters  
NAME Rs-3-247  
EXPNO 2  
PROCNO 1

F2 - Acquisition Parameters  
Date\_ 20090416  
Time 10.30  
INSTRUM spect  
PROBHD 5 mm QNP 1H/13  
PULPROG zgpg30  
TD 65536  
SOLVENT CDCl3  
NS 242  
DS 4  
SWH 23980.814 Hz  
FIDRES 0.365918 Hz  
AQ 1.3664756 sec  
RG 1149.4  
DW 20.850 usec  
DE 6.00 usec  
TE 298.2 K  
D1 2.0000000 sec  
d11 0.0300000 sec  
DELTA 1.8999999 sec  
MCREST 0.0000000 sec  
MCWRK 0.0150000 sec

===== CHANNEL f1 =====  
NUC1 13C  
P1 10.50 usec  
PL1 0.00 dB  
SFO1 100.6228298 MHz

===== CHANNEL f2 =====  
CPDPRG2 waltz16  
NUC2 1H  
PCPD2 80.00 usec  
PL2 -6.00 dB  
PL12 14.56 dB  
PL13 16.50 dB  
SFO2 400.1316005 MHz

F2 - Processing parameters  
SI 32768  
SF 100.6127483 MHz  
WDW EM  
SSB 0  
LB 1.00 Hz  
GB 0  
PC 1.00

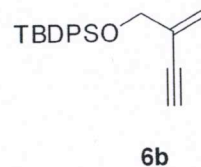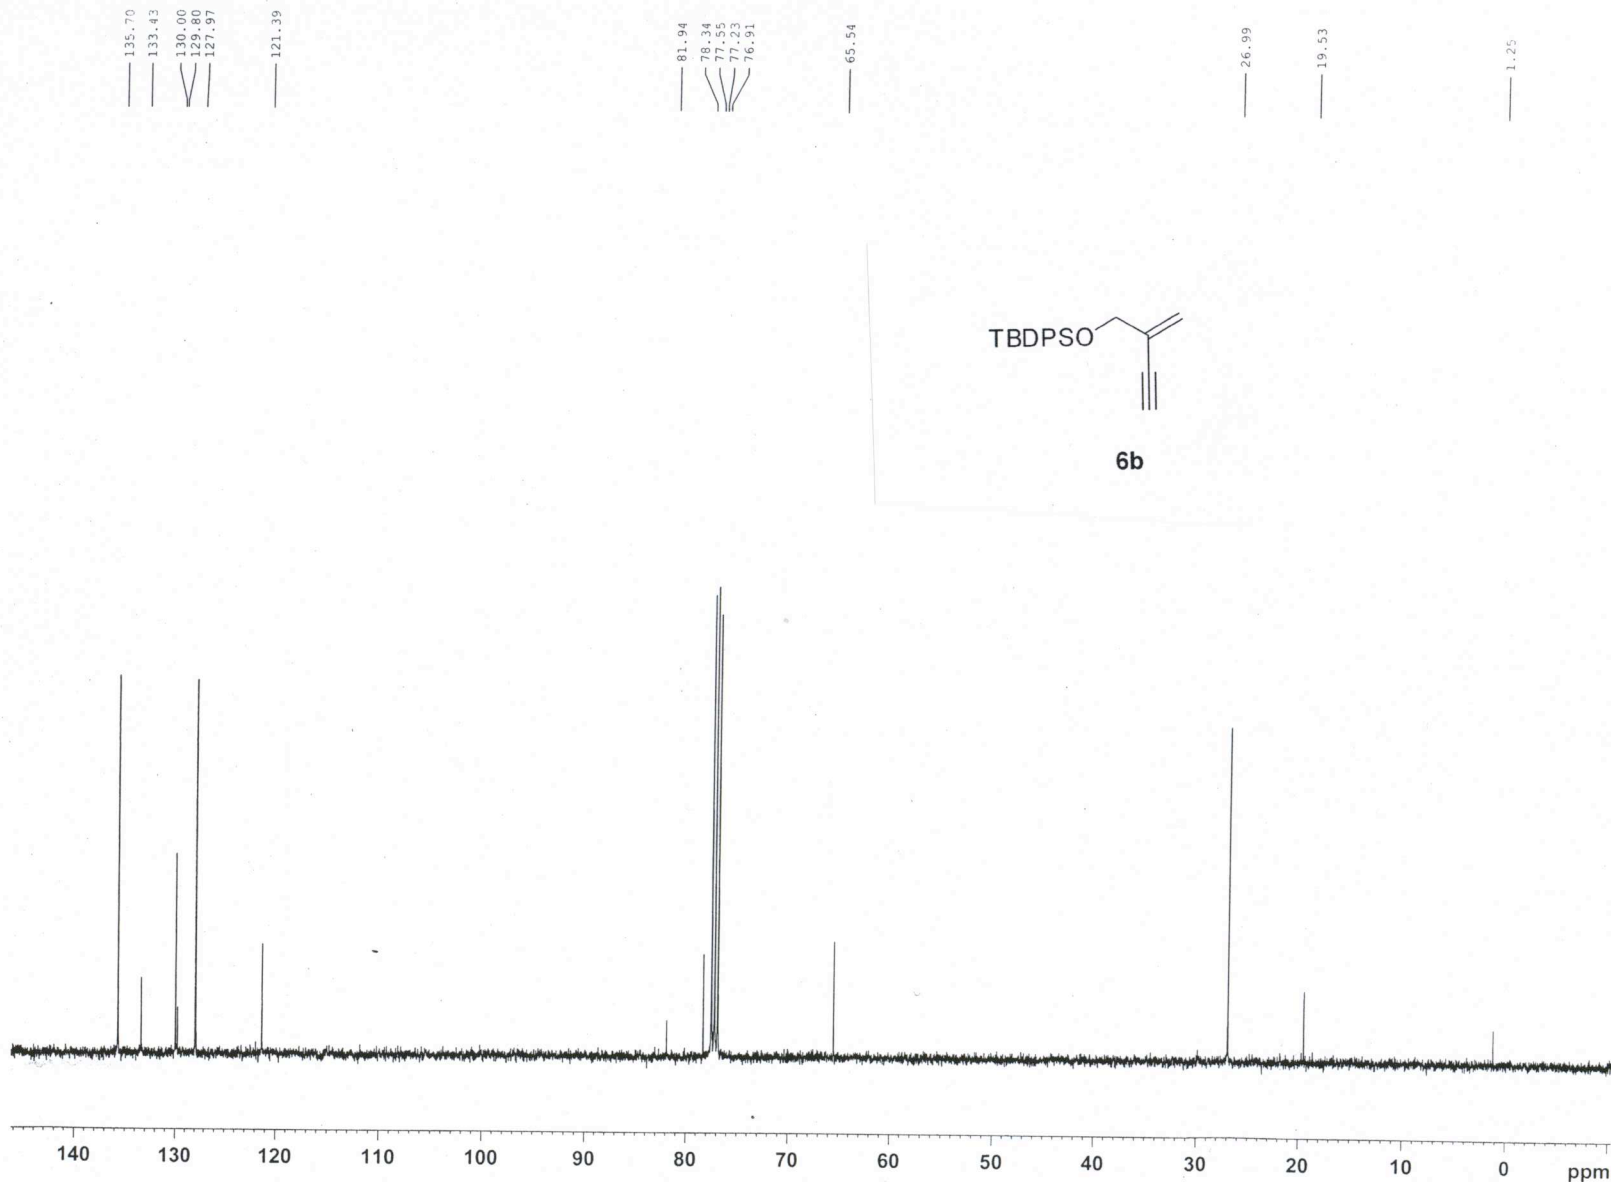

The Ohio State University  
Department of Chemistry  
NMR Facility  
400MHz - 0083

Current Data Parameters  
NAME Rs-3-251  
EXPNO 3  
PROCNO 1

F2 - Acquisition Parameters  
Date\_ 20090421  
Time 11.42  
INSTRUM spect  
PROBHD 5 mm QNP 1H/13  
PULPROG zg30  
TD 65536  
SOLVENT CDCl3  
NS 16  
DS 2  
SWH 8278.146 Hz  
FIDRES 0.126314 Hz  
AQ 3.9584243 sec  
RG 203.2  
DW 60.400 use  
DE 6.00 use  
TE 298.2 K  
D1 1.00000000 sec  
MCREST 0.00000000 sec  
MCWRK 0.01500000 sec

==== CHANNEL f1 =====  
NUC1 1H  
P1 13.00 use  
PL1 0.00 dB  
SFO1 400.1324710 MHz

F2 - Processing parameters  
SI 32768  
SF 400.1300351 MHz  
WDW EM  
SSB 0  
LB 0.30 Hz  
GB 0  
PC 1.00

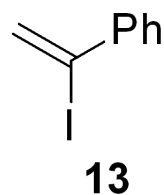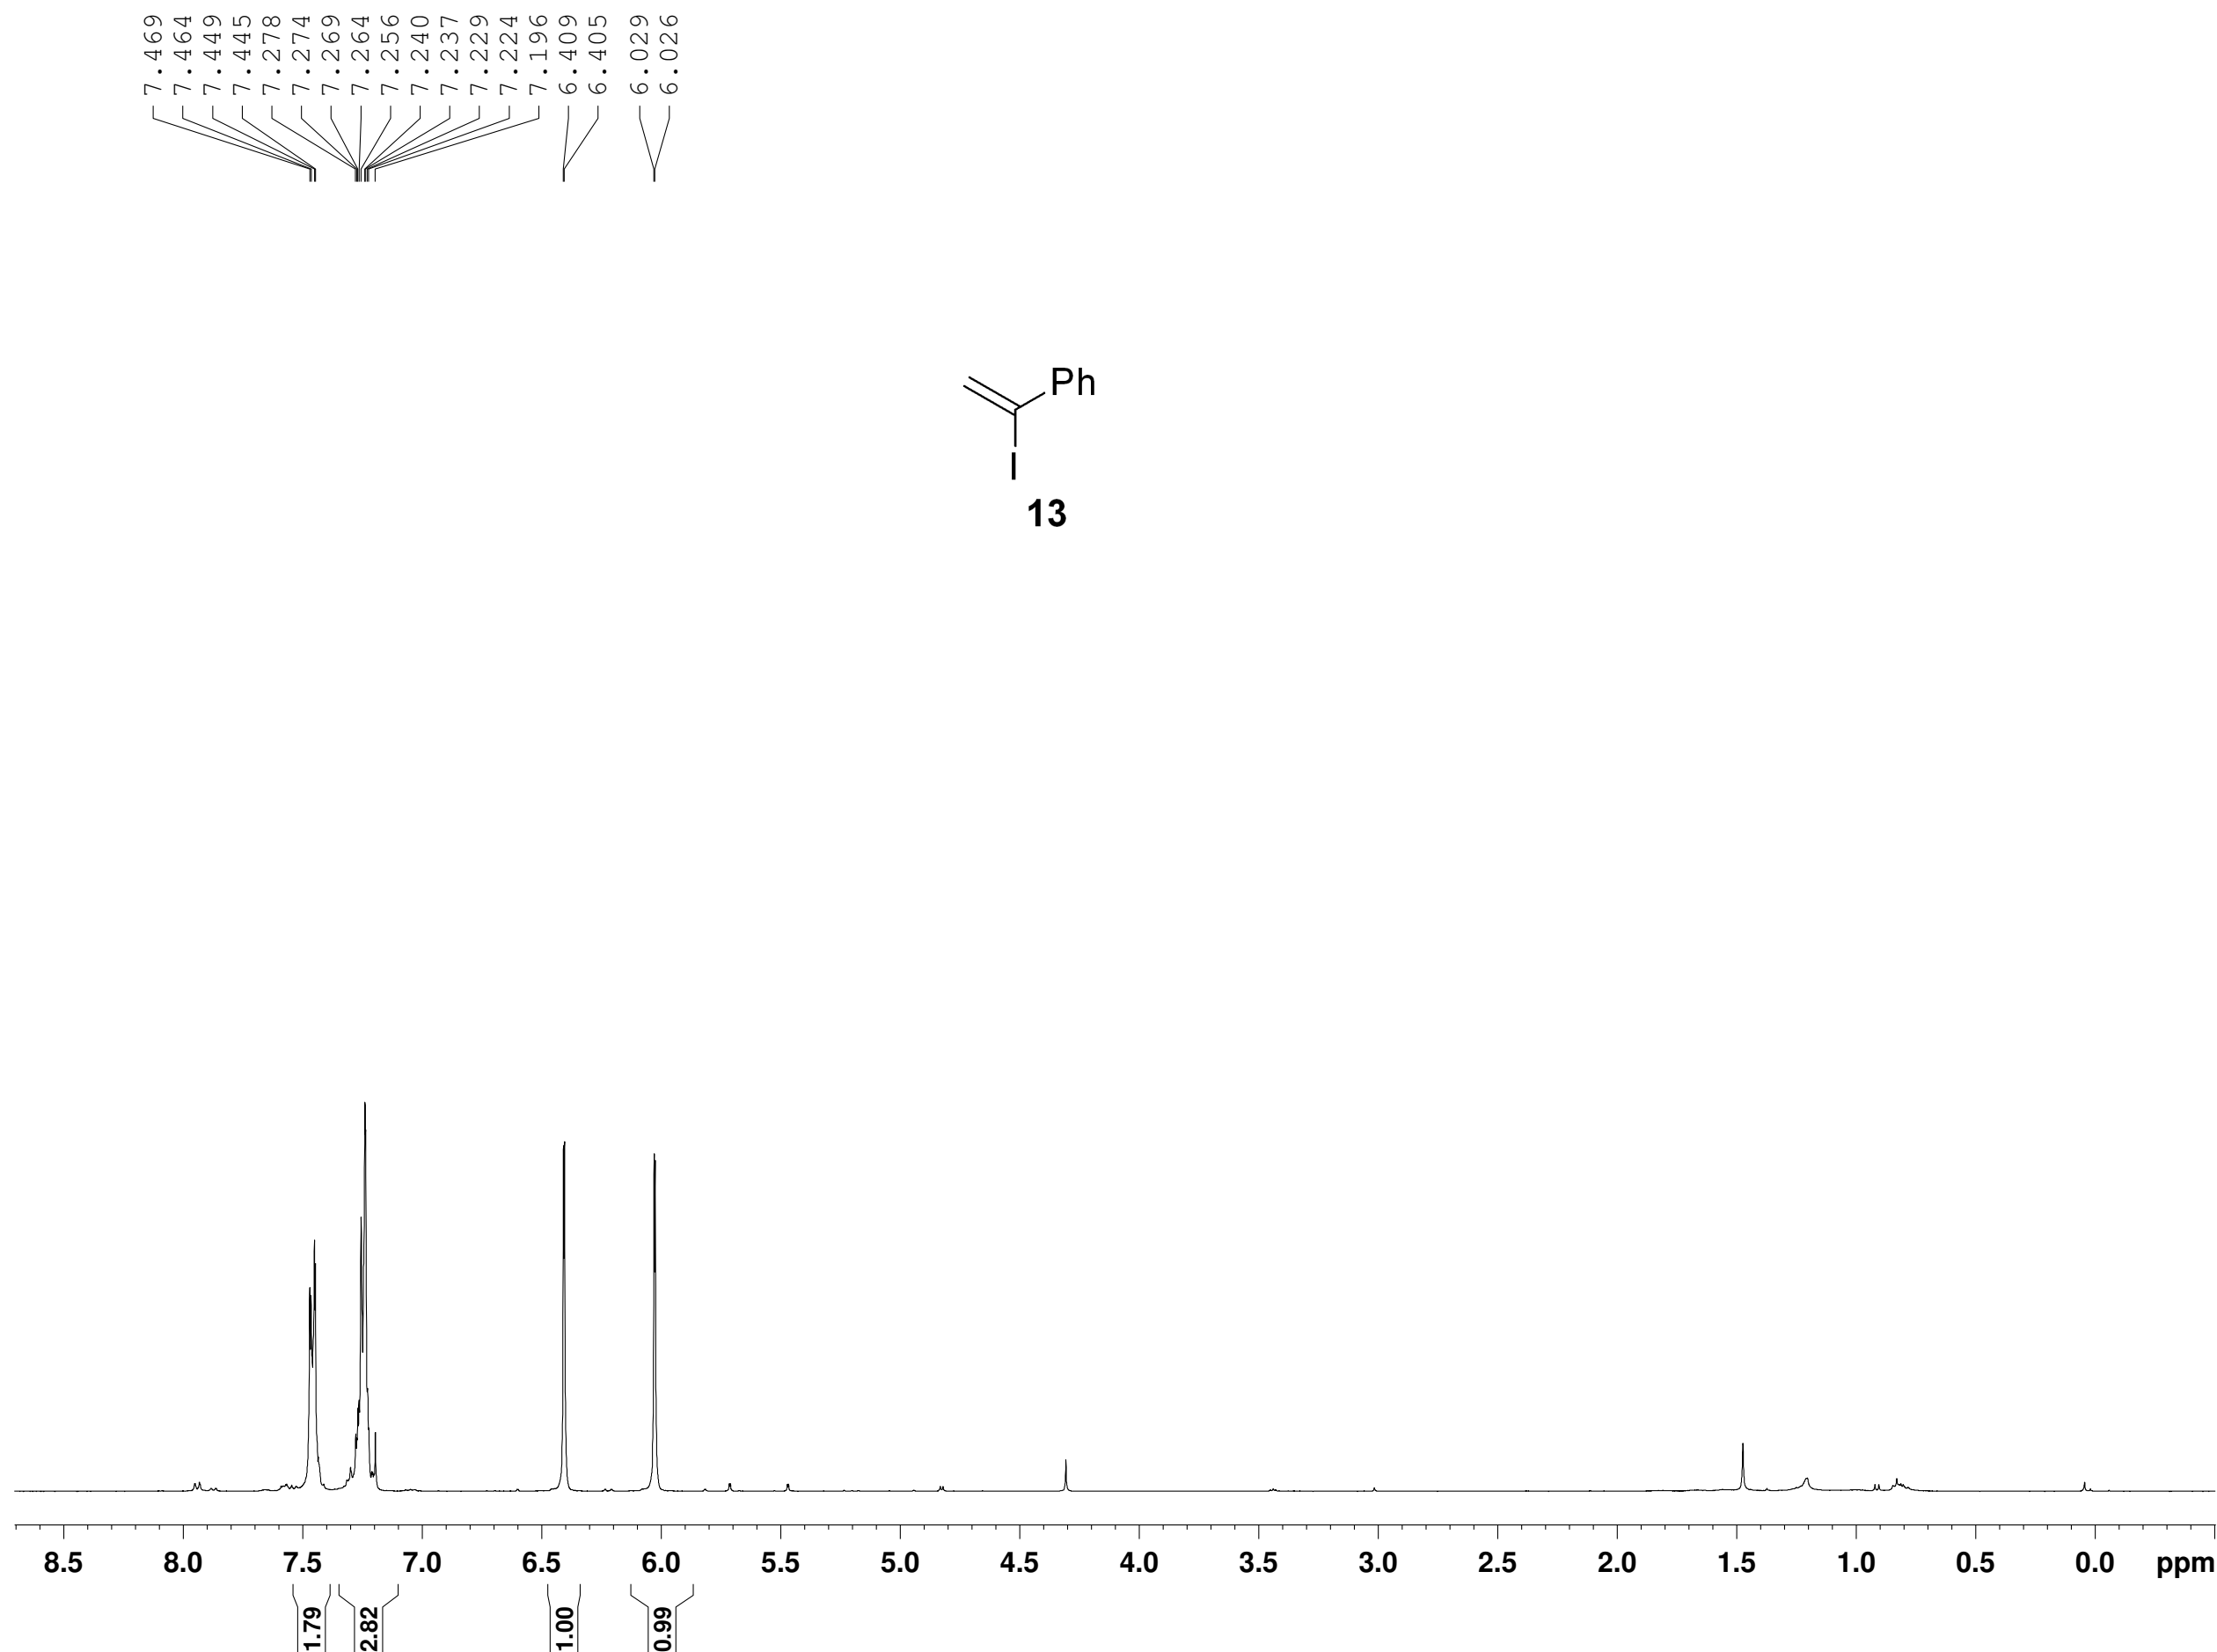

The Ohio State University  
Department of Chemistry  
NMR Facility  
400MHz - 0083

Current Data Parameters  
NAME Rs-3-251  
EXPNO 4  
PROCNO 1

F2 - Acquisition Parameters  
Date\_ 20090421  
Time 11.45  
INSTRUM spect  
PROBHD 5 mm QNP 1H/13  
PULPROG zgpg30  
TD 65536  
SOLVENT CDCl3  
NS 20  
DS 4  
SWH 23980.814 Hz  
FIDRES 0.365918 Hz  
AQ 1.3664756 sec  
RG 2580.3  
DW 20.850 use  
DE 6.00 use  
TE 298.2 K  
D1 2.00000000 sec  
d11 0.03000000 sec  
DELTA 1.89999998 sec  
MCREST 0.00000000 sec  
MCWRK 0.01500000 sec

==== CHANNEL f1 =====  
NUC1 13C  
P1 10.50 use  
PL1 0.00 dB  
SFO1 100.6228298 MHz

==== CHANNEL f2 =====  
CPDPRG2 waltz16  
NUC2 1H  
PCPD2 80.00 use  
PL2 -6.00 dB  
PL12 14.56 dB  
PL13 16.50 dB  
SFO2 400.1316005 MHz

F2 - Processing parameters  
SI 32768  
SF 100.6127413 MHz  
WDW EM  
SSB 0  
LB 1.00 Hz  
GB 0  
PC 1.40

129.1  
128.5  
128.2  
127.5

77.61  
77.30  
76.98

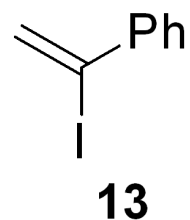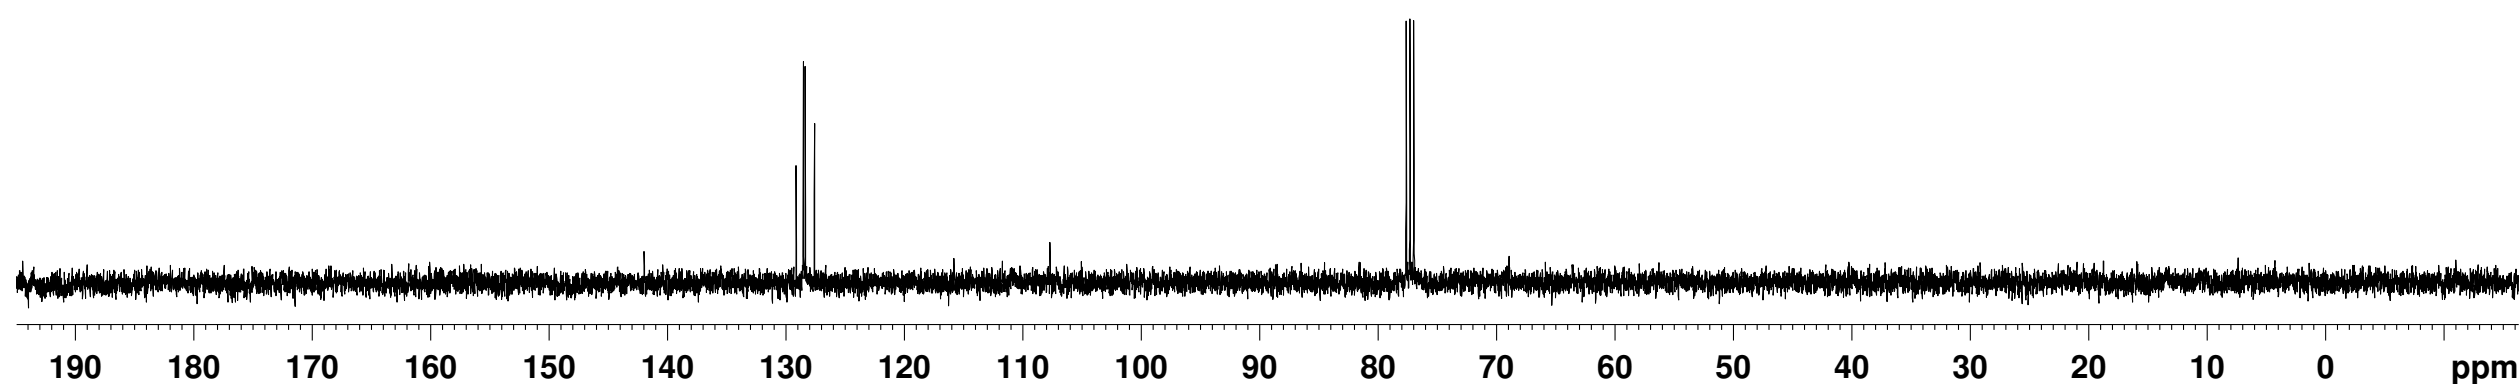

7.646  
7.642  
7.628  
7.625  
7.365  
7.361  
7.345  
7.329  
7.326  
7.313  
7.310  
7.293  
7.240

5.922  
5.702

0.248  
0.244  
0.235  
0.191  
0.184  
0.180  
0.171  
0.167

The Ohio State University  
Department of Chemistry  
NMR Facility  
400MHz - 0083

Current Data Parameters  
NAME Rs-3-253  
EXPNO 1  
PROCNO 1

F2 - Acquisition Parameters  
Date\_ 20090422  
Time 9.09  
INSTRUM spect  
PROBHD 5 mm QNP 1H/13  
PULPROG zg30  
TD 65536  
SOLVENT CDCl3  
NS 16  
DS 2  
SWH 8278.146 Hz  
FIDRES 0.126314 Hz  
AQ 3.9584243 sec  
RG 114  
DW 60.400 use  
DE 6.00 use  
TE 298.2 K  
D1 1.00000000 sec  
MCREST 0.00000000 sec  
MCWRK 0.01500000 sec

==== CHANNEL f1 =====  
NUC1 1H  
P1 13.00 use  
PL1 0.00 dB  
SFO1 400.1324710 MHz

F2 - Processing parameters  
SI 32768  
SF 400.1300171 MHz  
WDW EM  
SSB 0  
LB 0.30 Hz  
GB 0  
PC 1.00

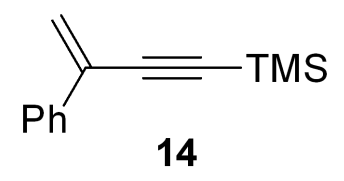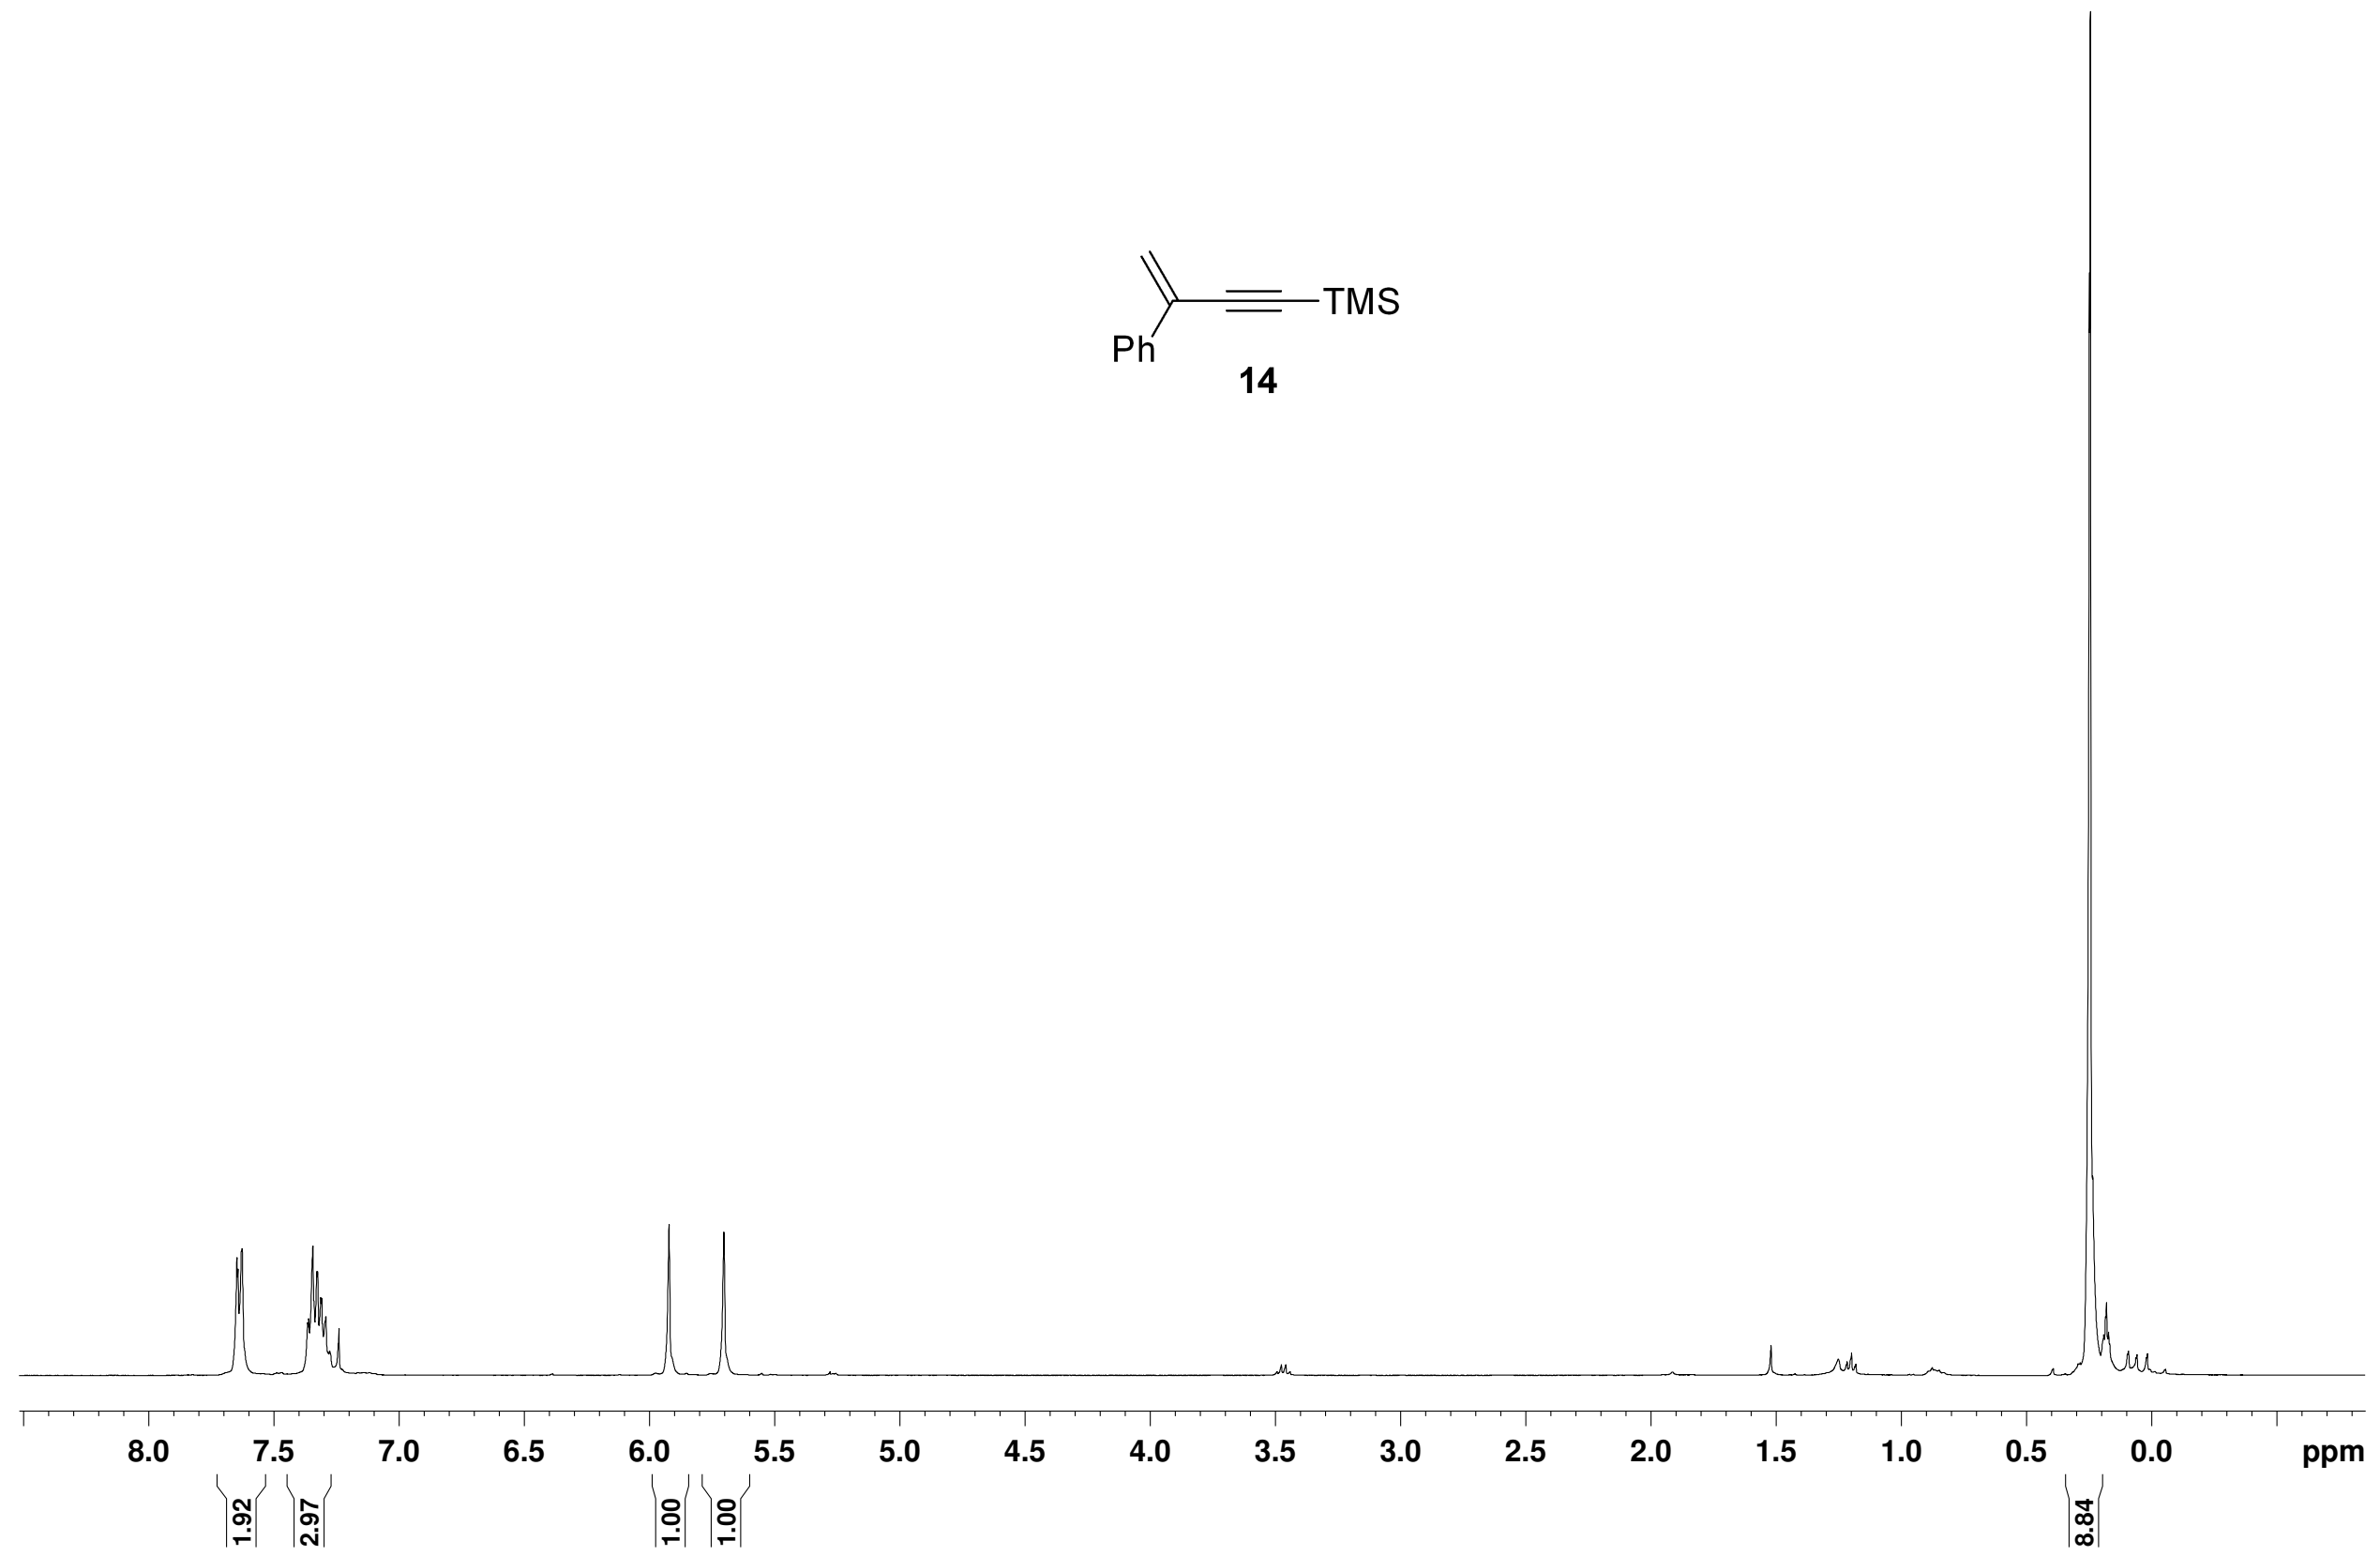

137.16

130.87

128.59

128.55

126.28

121.68

104.33

96.14

77.57

77.25

76.94

0.18

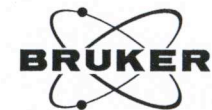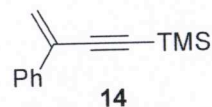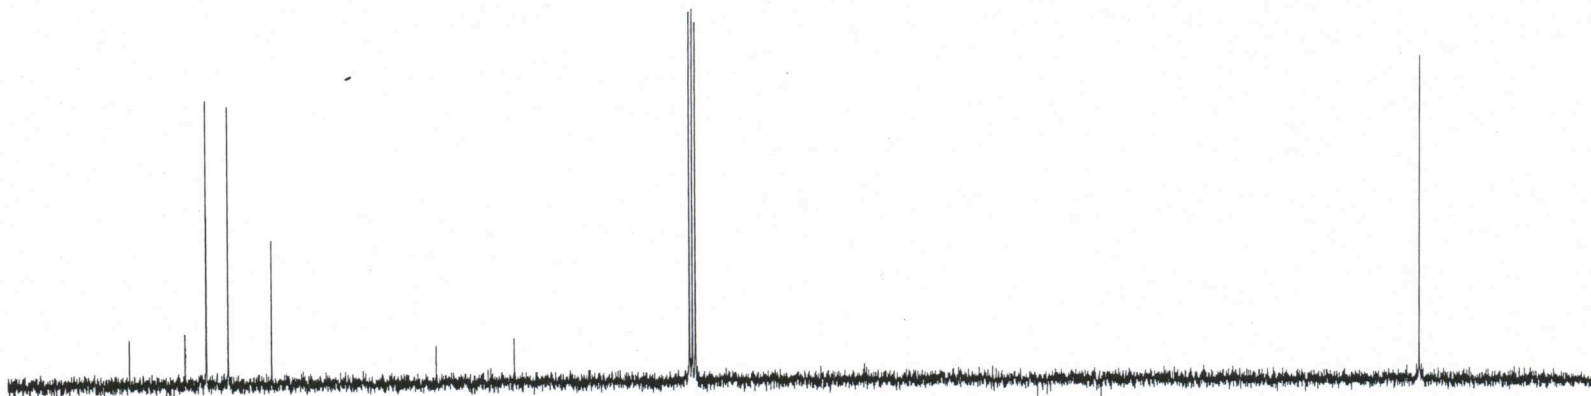

Current Data Parameters  
NAME Rs-3-253  
EXPNO 2  
PROCNO 1

F2 - Acquisition Parameters  
Date\_ 20090422  
Time 9.13  
INSTRUM spect  
PROBHD 5 mm QNP 1H/13  
PULPROG zgpg30  
TD 65536  
SOLVENT CDCl3  
NS 79  
DS 4  
SWH 23980.814 Hz  
FIDRES 0.365918 Hz  
AQ 1.3664756 sec  
RG 4096  
DW 20.850 usec  
DE 6.00 usec  
TE 298.2 K  
D1 2.00000000 sec  
d11 0.03000000 sec  
DELTA 1.89999998 sec  
MCREST 0.00000000 sec  
MCWRK 0.01500000 sec

==== CHANNEL f1 =====  
NUC1 13C  
P1 10.50 usec  
PL1 0.00 dB  
SFO1 100.6228298 MHz

==== CHANNEL f2 =====  
CPDPRG2 waltz16  
NUC2 1H  
PCPD2 80.00 usec  
PL2 -6.00 dB  
PL12. 14.56 dB  
PL13 16.50 dB  
SFO2 400.1316005 MHz

F2 - Processing parameters  
SI 32768  
SF 100.6127461 MHz  
WDW EM  
SSB 0  
LB 1.00 Hz  
GB 0  
PC 1.00



7.663  
7.659  
7.654  
7.642  
7.372  
7.368  
7.363  
7.352  
7.333  
7.323  
7.319  
7.309  
7.303  
7.294  
7.284  
7.240

5.979  
5.752

3.100

1.246

0.189  
0.171  
0.090  
0.085  
0.063  
0.040

The Ohio State University  
Department of Chemistry  
NMR Facility  
400MHz - 0083

Current Data Parameters  
NAME Rs-3-254  
EXPNO 1  
PROCNO 1

F2 - Acquisition Parameters  
Date\_ 20090422  
Time 14.13  
INSTRUM spect  
PROBHD 5 mm QNP 1H/13  
PULPROG zg30  
TD 65536  
SOLVENT CDCl3  
NS 16  
DS 2  
SWH 8278.146 Hz  
FIDRES 0.126314 Hz  
AQ 3.9584243 sec  
RG 181  
DW 60.400 use  
DE 6.00 use  
TE 298.2 K  
D1 1.00000000 sec  
MCREST 0.00000000 sec  
MCWRK 0.01500000 sec

==== CHANNEL f1 =====  
NUC1 1H  
P1 13.00 use  
PL1 0.00 dB  
SFO1 400.1324710 MHz

F2 - Processing parameters  
SI 32768  
SF 400.1300174 MHz  
WDW EM  
SSB 0  
LB 0.30 Hz  
GB 0  
PC 1.00

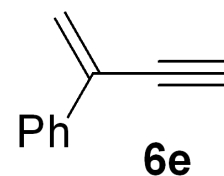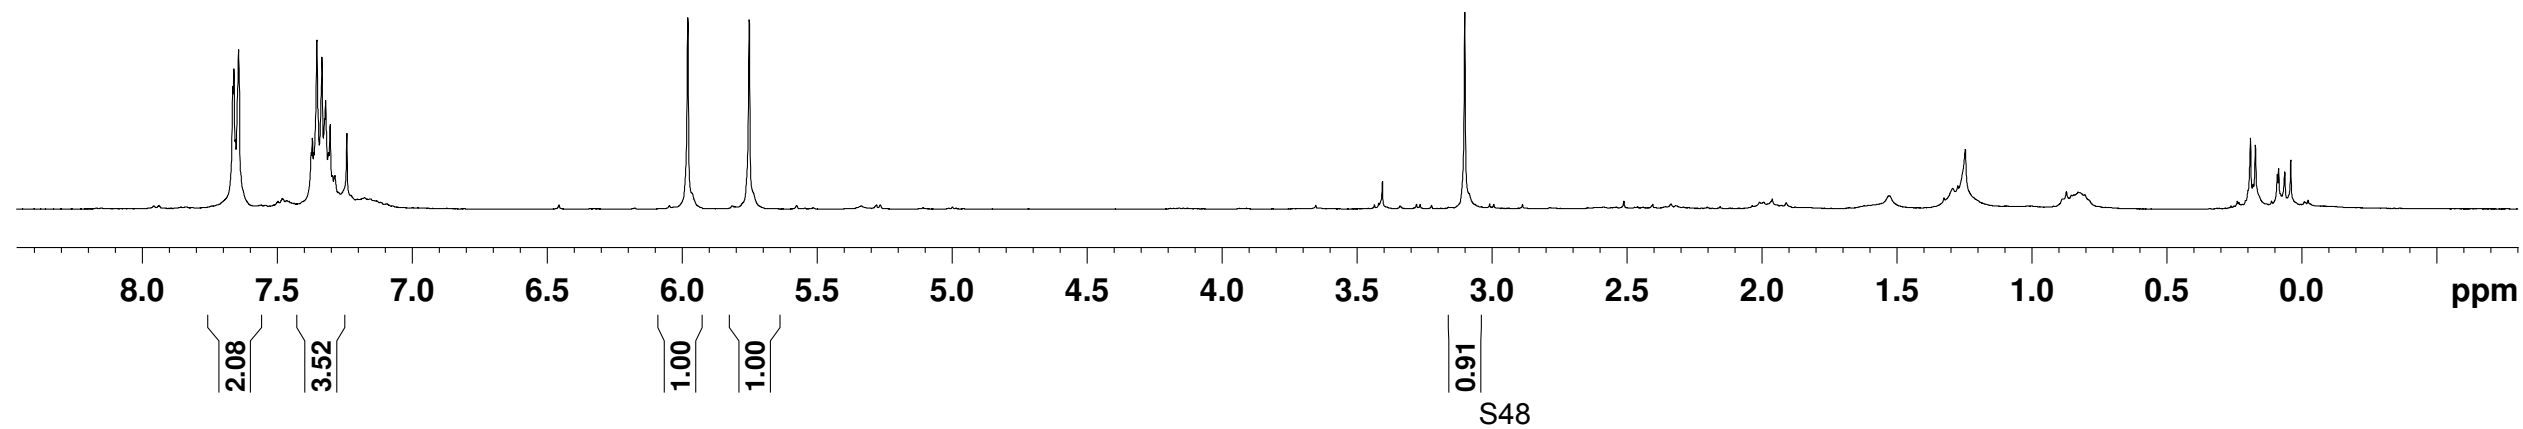

136.854  
 129.966  
 128.665  
 128.622  
 126.199  
 122.451

82.982  
 78.860  
 77.550  
 77.232  
 76.915

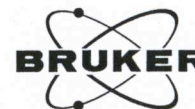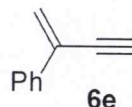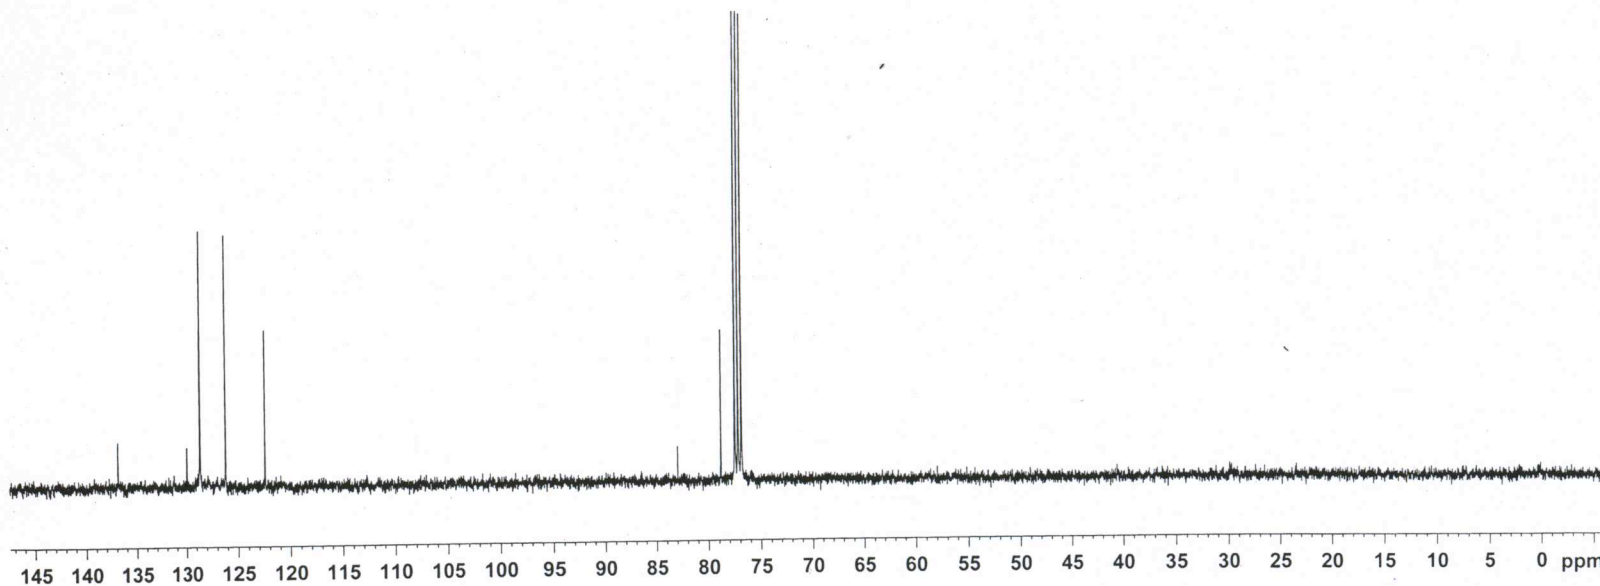

Current Data Parameters  
 NAME Rs-3-254  
 EXPNO 2  
 PROCNO 1

F2 - Acquisition Parameters  
 Date\_ 20090422  
 Time\_ 14.17  
 INSTRUM spect  
 PROBHD 5 mm QNP 1H/13  
 PULPROG zgpg30  
 TD 65536  
 SOLVENT CDC13  
 NS 245  
 DS 4  
 SWH 23980.814 Hz  
 FIDRES 0.365918 Hz  
 AQ 1.3664756 sec  
 RG 2896.3  
 DW 20.850 use  
 DE 6.00 use  
 TE 298.2 K  
 D1 2.00000000 sec  
 d11 0.03000000 sec  
 DELTA 1.89999998 sec  
 MCREST 0.00000000 sec  
 MCWRK 0.01500000 sec

===== CHANNEL f1 =====  
 NUC1 13C  
 P1 10.50 use  
 PL1 0.00 dB  
 SFO1 100.6228298 MHz

===== CHANNEL f2 =====  
 CPDPRG2 waltz16  
 NUC2 1H  
 PCPD2 80.00 use  
 PL2 -6.00 dB  
 PL12 14.56 dB  
 PL13 16.50 dB  
 SFO2 400.1316005 MHz

F2 - Processing parameters  
 SI 32768  
 SF 100.6127483 MHz  
 WDW EM  
 SSB 0  
 LB 1.00 Hz  
 GB 0  
 PC 1.00
